# Supplementary material for: Integrative Proteomic and Phosphoproteomic Analyses of Pattern- and Effector-Triggered Immunity in Tomato
Source: Front Plant Sci. 2021 Dec 3;12:768693. doi: 10.3389/fpls.2021.768693 (PMC8677958; doi:10.3389/fpls.2021.768693)
Supplement: Supplementary file 13 [file Table_10.XLSX]

## Sheet: Table S10
Supplementary Table S10. List of hits between our proteomic data and multiple RNAseq data.
Accession No.(a)	Protein name(b)	Abbreviation(c)	Number of amino acids	Molecular weight (kDa)	Calculated pI	Sequence	Protein abundance from the whole proteome(d)				Transcriptional level from previous RNAseq studies(e)
											Pombo et al., 2014				Rosli et al., 2013						Yang et al., 2015
							PTI/CK		ETI/CK		Pseudomonas syringae pv tomato DC3000 delta;avrPto delta;avrPtoB' vs 'Pseudomonas syringae pv tomato DC3000 delta;avrPto delta;avrPtoB delta;fliC'		Pseudomonas syringae pv tomato DC3000 delta;fliC' vs 'Pseudomonas syringae pv tomato DC3000 delta;avrPto delta;avrPtoB delta;fliC'		Pseudomonas syringae pv. tomato str. DC3000' vs 'control'		Pseudomonas fluorescens' vs 'control'		Pseudomonas putida KT2440' vs 'control'		Pseudomonas syringae pv. tomato str. DC3000' vs 'mock' in 'nightly red light regimen'		Pseudomonas syringae pv. tomato str. DC3000' vs 'mock' in 'nightly continuous dark (no light) regimen'
							Ratio	p value	Ratio	p value	Ratio	p value	Ratio	p value	Ratio	p value	Ratio	p value	Ratio	p value	Ratio	p value	Ratio	p value
	Signaling
	Protein kinase and phosphatase
Solyc06g005170.3.1	Mitogen-activated protein kinase 3	MPK3	373	42.8	5.76	MVDANMGAAQFPDFPKIVTHAGQYVQYDIFGNLFEITNKYQPPIMPIGRGAYGIVCSVFNAELNEMVAVKKIANAFDNYMDAKRTLREIKLLRHLDHENVIGLRDVIPPPLRREFSDVYIATELMDTDLHQIIRSNQGLSEDHCQYFMYQLLRGLKYIHSAHVIHRDLKPSNLLLNANCDLKICDFGLARPNVENENMTEYVVTRWYRAPELLLNSSDYTAAIDVWSVGCIFMELMNRKPLFAGKDHVHQIRLLTELLGTPTESDLSFLRNEDAKRYVRQLPQHPRQQLATVFPHVNPLAIDLVDKMLTLDPTRRITVEEALAHPYLAKLHDAADEPVCPIPFSFDFEQQGIGEEQIKDMIYQEALALNPEYA	1.3323	0.000294546	1.61504	2.51894e-05	#N/A	#N/A	#N/A	#N/A	#N/A	#N/A	#N/A	#N/A	2.46229	2.51248e-06	2.82843	3.56364e-06	6.06287	9.59293e-22
Solyc12g009020.2.1	MAP kinase kinase 1	MKK1	357	39.6	5.94	MKKGSFAPNLKLSLPPPDEVALSKFLTESGTFKDGDLLVNRDGVRIVSQSEVAAPSVIQPSDNQLCLADFEAVKVIGKGNGGIVRLVQHKWTGQFFALKVIQMNIDESMRKHIAQELRINQSSQCPYVVICYQSFFDNGAISLILEYMDGGSLADFLKKVKTIPERFLAVICKQVLKGLWYLHHEKHIIHRDLKPSNLLINHRGDVKITDFGVSAVLASTSGLANTFVGTYNYMSPERISGGAYDYKSDIWSLGLVLLECATGHFPYKPPEGDEGWVNVYELMETIVDQPEPCAPPDQFSPQFCSFISACVQKHQKDRLSANDLMSHPFITMYDDQDIDLGSYFTSAGPPLATLTEL	1.04087	0.216012	1.1001	0.0187751	1.99	0.0240836	2.77	6.97146e-06	#N/A	#N/A	#N/A	#N/A	#N/A	#N/A	3.03143	2.67405e-17	2.82843	1.62571e-07
Solyc04g016260.3.1	Calcium-transporting ATPase	ACA	1043	113.6	6.48	MANILEPDEFDLPGKNPSVEAQRRWRDAVSFVRNRRRRFRYGSNLEKRKEAKELMEKTREKIRVGFMAYMAALKFIDAGDHGRSSDQVNNVIGAELAKDLPEEAREAGFGINPDKLASIVGSYDIKTLKKLGGVEGLAGKLRVSSNEGVKSSDVSVRQNIYGSNKFTEKPFKSFWTFVWEALHDLTLIILIVCAVVSIGVGLATEGWPKGTYDGLGILLSIVLVVMVTAISDYRQSLQFRDLDKEKKKISIHVTRDGSRQKVSIYDLVVGDVVHLSIGDLVPGDGIFISGYSLLIDQSSLSGESVPVSISEKRPFLLSGTKVQDGSAKMLVTTVGMRTEWGKLMETLSEGGEDETPLQVKLNGVATIIGKIGLGFAVVTFLVLIVRFLVNKATHHEITE…	1.14343	0.0271443	1.13832	0.0011495	1.53	0.395216	3.98	4.11828e-08	#N/A	#N/A	2	2.28551e-05	3.03143	3.89185e-12	2.14355	4.40126e-05	3.24901	1.57424e-05
Solyc10g079130.2.1	Calcium-dependent protein kinase 32-like	CPK32	525	59.6	6.32	MGNCCAVPKTSETEEKKRGKNKPNPFSVDYGHHGNGHKSYVLDNPTGTDIEATYELGRELGRGEFGVTYLSTDKVSGEVYACKSISKKKLRTRVDIEDVRREVEIMKHLPKHPNIVTLKDTYEDDNAVHIVMELCEGGELFDRIVARGHYTERAAAAVTRTIVEVIQMCHKHGVMHRDLKPENFLFENKKETAPLKAIDFGLSVFFKPGERFNEIVGSPYYMAPEVLKRDYGPEVDVWSAGVILYILLCGVPPFWAETEQGVAQAIIRSVVNFKRDPWPKVSDNAKDLVKKMLNPDPSQRLTAQEVLDHPWIQNAKKAPNVSLGETVKARLKQFSMMNKLKKRALRVIAEHLTVDEVAGIKEGFQLMDISNKGKIDVNELRVGLQKLGHQIPESDVQIL…	1.22503	0.00235625	1.45296	0.00169415	1.55	0.744788	2.49	0.000466259	#N/A	#N/A	2.63902	1.0456e-12	4.28709	8.2969e-25	3.4822	3.12389e-10	3.73213	3.18796e-09
Solyc03g113220.3.1	Hypersensitive-induced response protein	HIR	285	31.3	5.92	MGNLFCCVQVDQSTVAIKEQFGKYQDVLEPGCHCVPWFLGSQLAGHLSLRVQQLDVRCETKTKDNVFVNVVASIQYRAIADKANEAFYKLSNTKGQIQAYVFDVIRASVPKLILDDVFEQKNEIAKAVEEELEKAMSAYGYEIVQTLIVDIVPDEHVKRAMNEINAAARLRVAANEKAEAEKILQIKRAEGEAESKYLSGLGIARQRQAIVDGLRDSVLGFSVNVPGTTAKDVMDMVLVTQYFDTMKEIGASSKSSAVFIPHGPGAVKEVAQQIRDGLLQATVGH	1.03563	0.250738	1.1971	0.00861365	1.43	0.545663	3.48	5.75385e-09	#N/A	#N/A	#N/A	#N/A	#N/A	#N/A	3.24901	7.80247e-15	2	0.000897225
Solyc06g075160.3.1	SIT4 phosphatase-associated family protein	SIT4	842	93.3	4.67	MFWKLTHLSCSPVEEVLDKENFTLEELLDEEEIIQECKALNSRLINFLRDRAQVEQLLRYIVEVPSEDADSKWKFKFPFIACEIFTCEIDVILKTLVDDEELMDLLFSFLETDRPHCALLAGYFSKVVVCLMLRKTIPLMNYVQTHHDVFRQMVDLIGITSIMEVLVRLVGADIYPNTKDVMQWLADSNLLEMIVDKLSPSSSPEVHANAAETLCTITLNAPSPLATKLSSPSFIARIFSHALEDSHSKSALVHSLSVCISLLDPKRSIPSPMMYSYRCQHVYESSVCVNPETISAMLPNFSNLLKLLNVSSDDKVLPTTYGELRPPLGKHRLKIVEFISVLLKTGNEVAEDELISSGTIERVLDLFFEYAFNNALHHHVESIINSCLESRNSVLVDHL…	1.11191	0.0622431	1.15825	0.0222742	#N/A	#N/A	#N/A	#N/A	#N/A	#N/A	#N/A	#N/A	#N/A	#N/A	2	6.80983e-07	2	0.000221199
Solyc02g086520.3.1	Proline-rich receptor-like kinase, putative (DUF1421)	PERK	545	59.3	6.44	MNSSQYMDKQIMDLSNSQNSNNNSDFIDLVNPQADRHISGDDQKKEDIVPSYEFHPIRPIGSSSPKSNIDSSNVGVARAWNSADSKNNAESYIRNYGSLDTIGPTKVILEKDLGSVYSSQLSEIDHTVKKYADNLLHAVEGVSARLSQLETRNRQIDNSIDELKLSVGNNHGVTDGKLRQLENILREVQDGVQVIRDKQEIMDAQLQLMKSQAPKIEQQAETHSTTHTDSSQPTTAPLHSHQQFPPVALTQQPSTLAPPPPQQNLPYQVQLQNQFPHNPIPSHPQPEAYYPPAGQAPENLGHQYQSPVAQQHQPSPPPPHQQHQSTPQPIYSQPPPPAQPHLPHPSQPQPQPLVGHHREETPFVPSQTYPPPSIRQPPHSSSGAPPSQQLYGTPPNIFE…	0.907125	0.00747273	0.976463	0.393436	#N/A	#N/A	#N/A	#N/A	#N/A	#N/A	#N/A	#N/A	#N/A	#N/A	#N/A	#N/A	2.46229	0.000190032
	Other signaling pathway										#N/A	#N/A	#N/A	#N/A	#N/A	#N/A	#N/A	#N/A	#N/A	#N/A	#N/A	#N/A	#N/A	#N/A
Solyc11g056680.1.1	Leucine-rich repeat receptor-like protein	LRR-RLK	364	39.9	8.31	MGSFMYIAILLAAIISTVHSCPPSDRAALLSFRAALNESHLGIFNSWKGNDCCHEWYGVSCDPTTHRIADINLRGESEDPLFEKAHRTGYMTGTISPSICKLERLSSLTIADWKGITGSIPSCITSLPFLRIIDLVGNKLTGSIPSTIGRLSRLTVLNVAENQLTGYIPRSLTNLSSLMHLDLRNNGIYGNIPTNFGKLRMLSRALLSRNKLTGPIPYSISYIYRLSDLDLSLNKLSGTIPPSLGKMHVLATLNLDGNHISGTIPPSLMNSRINILNLSKNAMEGYIPDSFDEKSYFMVMDLSYNKLKGSIPKSISSATFIGHLDVSHNHLCGQIPEGSPFDHLEASSFTYNDCLCGKPLKPCR	0.931476	0.654058	0.821646	0.0190842	#N/A	#N/A	#N/A	#N/A	#N/A	#N/A	0.5	0.00224767	0.406126	1.63167e-06	0.0769465	4.27916e-14	0.108819	4.35014e-17
Solyc02g064940.1.1	Leucine-rich repeat family protein	LRR	464	51.4	8.57	MNVLVVLIFFISSFFHVNALTSSVKNGREALQVIIGGGGDVAPAYPPQETLCPPPPPPEPLCPTPIPPPPPKPNPPKPPPPPKKPNPPKPTPNDLLTSAISVIQRFKKTITSDPSGITKTWVGKDICKDSTKYVGFICNKNKVVAVNFNGRNFKGNPLSLKDFINGIPTLEIFHSNSNNFTGEIPNNISTQSIPNLFELDLSNNKYVGLFPRAVLGATRLTYLDLRFNQIEGPVDPQVFTLDLDILFLNNNQFSGKIPENFGRTAALYLTLANNKFIGEIPKSIGYAKGNLLEVLFFNNQLTGCLPYEIGMLKLASVFDASKNKLTGPIPQSFGCLVQMEVMDLSYNQLYGEVPETLCKISSLEELTLKYNYFTQIGPECRKLVEENVLNIGMNCIIDL…	0.861751	0.0437253	0.863902	0.0119432	#N/A	#N/A	#N/A	#N/A	#N/A	#N/A	#N/A	#N/A	#N/A	#N/A	0.0717936	4.72439e-19	0.03125	1.14292e-17
Solyc10g008950.3.1	Guanylate-binding family protein	GBP	1071	121.2	6.73	MRRLFGRGSAGESPQQSSPSPSPSPPQTSPPSSVNIAAGPARPIRFVYCDEKGKFQIDPEALAILQLVKEPVGIVSVCGRARQGKSFILNQLLGRSSGFQVAATHRPCTKGIWLWSSPLRRTALDGTEYNLLLLDTEGIDAYDQTGTYSTQIFSLAVLLSSMFVYNQMGGIDEAALDRLSLVTEMTRHIRVRASGGRASSSELGQFSPVFVWLLRDFYLDLVEDNRKITPRDYLELALRPVQGGGKDVAAKNEIRDSIRALFPDRECFPLVRPLSNENELQRLDQIPLENLRPEFKAGLDALTRFVFERTRPKQVGATIMTGPLFARITQSFLDALNNGAVPTITSSWQSVEEAECQRAYDSAAERYMSSFDRSKPPEEGALREAHEDASQKAMAEFNS…	0.946106	0.543105	0.88301	0.0388962	#N/A	#N/A	#N/A	#N/A	#N/A	#N/A	#N/A	#N/A	#N/A	#N/A	#N/A	#N/A	#N/A	#N/A
	ROS homeostasis and defense defense										#N/A	#N/A	#N/A	#N/A	#N/A	#N/A	#N/A	#N/A	#N/A	#N/A	#N/A	#N/A	#N/A	#N/A
	ROS homeostasis										#N/A	#N/A	#N/A	#N/A	#N/A	#N/A	#N/A	#N/A	#N/A	#N/A	#N/A	#N/A	#N/A	#N/A
Solyc03g117980.3.1	Respiratory burst oxidase homologue D	RBOHD	938	105.2	9.06	MQNSENHHPHHHHHHSDTEVIGNDRASYSGPLSGPLNKRGGKKSARFNIPESTDIGTSAGAGAKSNDDAYVEITLDVREDSVAVHSVKTAGGADVEDPELALLAKGLEKKSTLGASLVRNASSRIRQVSQELKRLASLNKRPIPTGRFDRNKSAAAHALKGLKFISKTDGGAGWAAVEKRFDEITASTTGLLPRAKFGECIGMNKESKEFAGELYDALARRRNITTDSINKAQLKEFWDQVADQSFDTRLQTFFDMVDKDADGRITEEEVREIIGLSASANRLSTIQKQSDEYAAMIMEELDPNNLGYIMIENLEMLLLQAPNQTVQRGGESRNLSQMLSQKLKHTQEPNPLVRWYKSFKYFLLDNWQRVWVLLLWIGIMAGLFTWKYIQYKQKAAYGV…	1.05267	0.286452	1.29466	0.00412004	#N/A	#N/A	#N/A	#N/A	#N/A	#N/A	2.2974	3.79541e-12	3.73213	3.71388e-26	6.9644	5.84803e-39	13.9288	2.96102e-26
Solyc04g071890.4.1	Peroxidase 12	POD12	369	40.4	6.55	MPINLTILVTIIVQINYLAIAMVSTTLSSFLLVLVLSFFVSEAQRPALTKGLSWSFYQSSCPQLESIIRNRLQKQIKDDVGQAAGLLRLHFHDCFVQGCDGSVLLDGSAGGPSEQTAIPNLTLRKRSFKIIDDLRKRIQDECGQVVSCSDIVAIAARDSVVLTGGPNYDVPLGRKDGVNFATEQATIDNLVAPSANTTTVLSLLATKGLDATDAVALSGAHTIGISHCPSFTDRLYPNQDSTMDKTFANNLKGSCPTADSNNTVNMDIRSPNVFDNKYYVDLMNRQGLFTSDQDLYTDRRTRGIVTSFAVNQSLFYEKFVIGMIKMGQMNVLTGGQGEIRNRCDRRNKAKKVDIATVVEELEETFSALF	1.12396	0.0254677	1.04712	0.068548	5.34	3.37434e-08	2.88	0.00847745	#N/A	#N/A	#N/A	#N/A	#N/A	#N/A	#N/A	#N/A	#N/A	#N/A
Solyc04g082460.4.1	Catalase	CAT	492	56.8	7.27	MDPYKYRPSSAANSPFMTTNSGAPVYNNNSSLTVGTRGPILLEDYHLLEKIANFDRERIPERVVHARGASAKGFFEVTHDISHLTCADFLRAPGVQTPVIVRFSTVIHERGSPETLRDPRGFAVKFYTREGNFDLVGNNFPVFFVRDGMKFPDMVHALKPNPKSHIQENWRILDFFSHHPESLHMFSFLFDDLGIPQDYRHMDGFGVNTYMLINKAGKAQYVKFHWKPTCGVKCLLDEEAIKVGGSNHSHATKDLYDSIAAGNYPEWKLFIQTIDPDHEDRFDFDPLDVTKIWPEDILPLQPVGRLVLNRNIDNFFAENEQLAFCPAIIVPGVYYSDDKLLQTRVFSYADTQRHRLGPNYLQLPVNAPKCAHHNNHHEGLMNFMHRDEEVNYLPSRLDP…	1.15568	0.00384413	1.1026	0.0343691	#N/A	#N/A	#N/A	#N/A	#N/A	#N/A	#N/A	#N/A	#N/A	#N/A	#N/A	#N/A	#N/A	#N/A
Solyc08g080940.3.1	Glutathione peroxidase like encoding 1	GPX	239	26.7	9.06	MLCSTARVLLIPKQNLSILRRFSSILRQTQFNSVFNLPVSSFSKPIRTVLPNSLVTSKGFELWGLRSDHTMASQSSNPQSVYDFTVKDAKGKDVDLSIYKGKVLIIVNVASQCGLTNSNYTDMTELYKKYKDQGLEILAFPCNQFGGQEPGNIEDIQQMVCTRFKAEYPIFDKVDVNGDNAAPLYRFLKSSKGGFFGDGIKWNFSKFLIDKEGHVVDRYSPTTSPASMEKDIKKLLGVA	1.02962	0.647486	1.29582	0.0232099	2.78	0.0364127	15.48	6.07177e-06	#N/A	#N/A	3.03143	3.85339e-10	4.59479	2.09315e-17	4	4.35175e-24	3.03143	4.95758e-09
	Cell redox homeostasis										#N/A	#N/A	#N/A	#N/A	#N/A	#N/A	#N/A	#N/A	#N/A	#N/A	#N/A	#N/A	#N/A	#N/A
Solyc04g080850.3.1	Thioredoxin h	TrxH	123	13.6	6.32	MATSSEEGQVIGCHKVEEWKVQLQKGVETKKLVVVDFTASWCGPCRFIAPILADIAKKMPHVMFLKVDVDELKKVAEEWNVEAMPTFVFIKEGKEVDRVVGANKDGLLQTIEKHGAAPAVVTA	1.08461	0.451598	1.37163	0.0453433	1.19	1	3.77	0.000537008	#N/A	#N/A	#N/A	#N/A	#N/A	#N/A	#N/A	#N/A	#N/A	#N/A
Solyc04g064930.3.1	Thioredoxin-dependent peroxiredoxin	Prx	254	28.3	8.9	MVVIPTVTGLSTGAHLLSVPRTIATASRASPSSLPSLCYLKKSYYSPQRRSILPARKLVIRAARTESKGMSLGFRAPNFELTEPLTDKVWNLDDFEAYPALLVMFICNHCPFVIHLKKDIVKLSNFYMKKGLAVVAISSNSVVTHPQDGPEFMAEDAKFFKYPFPYLYDESQEVARDFVAVCTPEFFLFKKDGRRPFELVYHGQFDDSRPSNNMPVTGRDLSLAIDCVLSGQPVSSTQKPSIGCSIKWNPGGKQ	1.06094	0.527213	1.12431	0.0211757	#N/A	#N/A	#N/A	#N/A	#N/A	#N/A	0.435275	3.81557e-08	0.329877	1.45298e-10	0.0358968	5.10104e-108	0.0669858	7.11273e-16
Solyc05g005460.3.1	Nucleoredoxin 2	Nrx2	601	68.5	4.89	MAGENCHDVINLLGSSDRDFLIRNNGDKVKLDTLKEKKIGFYFSASWCGPCKHFTPNLVEAYNALLPKGDFEVVFLTADMDDESFKEYFSKMPWLAVPFSDSETRKRLNELFAVRGIPHLVILDASGKVVTNSGVEIIVEHGVEGYPFTQERLNELKEQEETAKREQSLKSILESQSRNYVIAADGRKVPVAELEGKIIGLYMSMASFEECESFTGKLIEMYDKLKSQGENFEIVMIPLDDEDDDESFKKEFSRMPWFSLPLKDKTCKKLARYFELSTLPTLVIIGTDGKTLHSNVAEAVEEHGILAYPFSHEKFAELEQIQKAKLEAQTLESILVTRDRDFVIGKDGEKILVSDLVGKTILLYFSAHWCPPCRAFTPQLKEAYETIKSKNGPLEVIFL…	1.1194	0.0234201	1.09609	0.0200776	2.2	0.430249	4.93	2.32731e-07	#N/A	#N/A	#N/A	#N/A	#N/A	#N/A	0.133972	1.77138e-39	0.0883883	6.04659e-26
Solyc02g093140.4.1	Cystathionine beta-synthase (CBS) domain-containing protein CBSX1, chloroplastic	CBSX1	234	25.5	8.73	MASISPSGSCLHRTPAAFHRQLPCLLLSLPGHILAASTKFYLPLRLSDSRDTFRLASANTLTANSVPPRNGVYTVGDFMTRKEELHVVKPTTSVDEALEALVEHRITGFPVIDDNWKLVGLVSDYDLLALDSVSGTGTADAGIFPEVDSNWKTFNEVQKLLGKTKGKVVGDLMTPAPLVVRESTNLEDAARLLLKTKYRRLPVVDGKGKLVGIITRGNVVRAALQIKRATEMED	1.11195	0.030281	0.985532	0.60402	#N/A	#N/A	#N/A	#N/A	#N/A	#N/A	#N/A	#N/A	#N/A	#N/A	#N/A	#N/A	#N/A	#N/A
	Stress defense										#N/A	#N/A	#N/A	#N/A	#N/A	#N/A	#N/A	#N/A	#N/A	#N/A	#N/A	#N/A	#N/A	#N/A
Solyc06g009020.2.1	Glutathione S-transferase	GST	213	23.7	6.43	MAIKVHGPMMSPAVMRVVATLKEKDLDFELVPVNMQAGDHKKEPFISLNPFGQVPAFEDGDLKLFESRAITQYIAHTYADKGNQLLPNDPKKMAVMSVWMEVEAQKFDPIGSKLGFEIVIKPMLGMVTDDAVVAENEEKLGKLLDVYESRLKESKYLGGESFTLADLHHAPSLHYLSGSKVKSLFDARPHVSAWVADILARPAWSKTIELSKQ	0.987862	0.839008	1.64291	0.00577155	4.11	0.123569	29.39	1.04431e-14	#N/A	#N/A	#N/A	#N/A	#N/A	#N/A	#N/A	#N/A	#N/A	#N/A
Solyc07g041720.1.1	Germin-like protein	GLP	211	22	6.77	MYFQALFLFSLVIISSSQAAVLDFCVGDLSLPDGPGGYACKKPSKVTADDFVFSGLAATGKIIPLIKAAVTPAFAPQFPGVNGLGISMARLDLAISGVIPMHTHPGASEVLYVVQGEICAGFISSSDNKVFFKTLKQGDIMVFPQGLLHFQINSGKTSALAIISFSSPTPGLQITDFALFANDLPTELVAATTFLDAALIKKLKGVLGGTN	0.816069	0.0146389	0.729412	0.0103056	#N/A	#N/A	#N/A	#N/A	#N/A	#N/A	0.435275	1.05793e-08	0.217638	7.2431e-34	0.0136024	1.32793e-76	0.0384733	2.10867e-33
Solyc03g123410.1.1	Germin-like protein.1	GLP1	208	21.6	6.29	MFKLLFLLAILLLSSDAAVQDFCVADLKAPESPSGYSCKSVTNVTVDDFVFSGLSAAGNTASIIKAAVTPAFAAQFPGLNGLGLSAARLDLAPSGVIPFHTHPGASEILLVVQGSITAGFVSSANSVYLKTLKKGDLMVFPQGLLHFQVSDAGYTSVGYVFFSSSNPGLQITDFALFANDLPTKLVAATTFLDEATIKKLKGVLGGTN	0.891267	0.0529518	0.739445	0.00217298	#N/A	#N/A	#N/A	#N/A	0.435275	0.00051228	0.189465	1.8668e-16	0.0824692	1.38667e-27	0.0145786	1.47394e-95	0.0358968	9.35042e-06
Solyc02g065170.3.1	L-ascorbate oxidase-like protein	ASO	539	60.2	9.25	MGKLALFHLLCGILIFWAVSVVKAEDPYKYFTWTATYGMASPLGTPQQVILINGQFPGPRLDLVTNDNIVLNLINKLDEPLLLTWNGIKQRKNSWQDGVLGTNCPIPPNRNYIYKFQPKDQIGSYTYFPSTQLHRAAGGFGVLNVYARSVIPVPYAKPAGDFSLLIGDWYKTSHKVLRQILDSGKSLPFPDGLLINGQKQSTFTGDQGKTYMFRISNVGLKTTINFRIQGHKMKLVEVEGSHVIQNLYDSFDVHVGQSLSILVTLDQSPKDYYIVASTRFTTTVLTSTSVLHYTNSQTPVSGPVPAAPVNQFQWSLMQARTIRWNLTSNAARPNPQGSFHYGKITPSRTILLANSAPLINGKQRYAVNGISYINPDTPLKLADHFNIPGVFTLDSIRSA…	1.13377	0.011482	0.927472	0.183734	#N/A	#N/A	#N/A	#N/A	#N/A	#N/A	0.307786	2.1134e-07	0.203063	9.07161e-10	0.0220971	4.49811e-66	0.0412346	7.72465e-34
Solyc08g023660.3.1	Kirola	Kirola	148	17.1	7.02	MGLKGKLISQIETKCSGHLLHEHFKSNPHKTSAMAPDKITNFTLHEGQLGKTNSVVSWNYILGGKERHAKQVLHIDDEEKSITFNFKEGYMNELYKSMTLTLTLIAEKNFITWTLVYEKLNENTPEPLDFIEFLIYLIKDLETHHVGK	0.87571	0.110516	0.742271	0.00133126	#N/A	#N/A	#N/A	#N/A	#N/A	#N/A	#N/A	#N/A	#N/A	#N/A	#N/A	#N/A	0.5	0.0139881
Solyc09g007630.3.1	P58IPK	P58IPK	492	54.7	6.49	MMEPLMKIWSFDLVAWRGFLFSALILNFIFACQLFFLQPLVSALDAKPGDAAALFERVAQNVKVKKYSEALNDLNSAIEADPTLSEAYWHRASLLRQLCRYEESEKSYKKFLEMKPRDSAAEKELSQMHQAKSALDSATNLLDTDDIKKALEYIDKVVLVFSPACSKAKLLKVKLLLADKDYSGVISEAGFILKEDEDNLEALLLRGRAYYYLADHDVSLRHYQKGLRSDPEHGELKKAYFGLKNLLKKTKSADDNVSKGKFRLAVEEYKAALALDPNHSAHNVNLHLGLCKVLVKLGRGKDAISSCSEALELDGELIDALVQRGEAKLLTEDWEGAVADLKEAAEKSPQDRNIREVLMRAERSLKLSKRKDWYKILGVSKTSSVSEIKKAYKKLALQW…	1.28671	0.022216	1.04185	0.215906	1.89	0.812607	5.67	6.37857e-05	#N/A	#N/A	3.73213	2.58316e-24	4.59479	3.26062e-26	3.4822	1.95394e-09	3.4822	1.03196e-05
Solyc12g100200.2.1	Selenoprotein O	SelO	618	69.5	6.21	MLSSLSHTSSSTTAFFLSSSAKFLRPRFSSCPFQFPIHQKRHRSLFSHSTAASMDSAATVDSVADDLKKQNLKGVEIKLKLNLEELNWDNSFVRELPGDPRSDSIPREVLHACYTKVLPSVPVNNPQLVAWSESVAELLELDPREFERPDFPLIFSGASPLVGAIPYAQNYGGHQFGMWAGQLGDGRAITLGEILNSKSQRWELQLKGAGKTPYSRFADGLAVLRSSIREFLCSEAMHGLGIPTTRALCLVTTGKDVMRDMFYDGNPKDEPGAIVCRVAQSFLRFGSYQLHASRGKKDFELVRALADYAIRYHFPHLENMTRSESISANTDVDLTSNKYAAWAVEVAERTASMIARWQDVGFTHGVMNTDNMSVLGLTIDYGPFGFLDSFDPSYTPNTT…	0.984733	0.755045	1.1204	0.0288333	#N/A	#N/A	#N/A	#N/A	#N/A	#N/A	#N/A	#N/A	#N/A	#N/A	0.329877	8.57119e-16	0.435275	3.79922e-06
	Gene expression & protein fate										#N/A	#N/A	#N/A	#N/A	#N/A	#N/A	#N/A	#N/A	#N/A	#N/A	#N/A	#N/A	#N/A	#N/A
	Transcription regulation										#N/A	#N/A	#N/A	#N/A	#N/A	#N/A	#N/A	#N/A	#N/A	#N/A	#N/A	#N/A	#N/A	#N/A
Solyc09g010400.3.1	Histone H2A	H2A1	145	15.4	10.54	MEKKGAGGRKGGGPKKKAVTRSVKAGLQFPVGRIGRYLKKGRYSERVGSGAPVYLAAVLEYLAAEVLELAGNAARDNKKNRIIPRHVLLAVRNDEELGKLLSGVTIAHGGVLPNINPILLPKKSDKVGKEPAKSPSKATKSPRKA	0.877698	0.175923	0.720024	0.00347847	#N/A	#N/A	#N/A	#N/A	#N/A	#N/A	#N/A	#N/A	#N/A	#N/A	#N/A	#N/A	#N/A	#N/A
Solyc11g073250.2.1	Histone H2A	H2A2	148	15.6	10.87	MESTGKVKKGAAGRRGGGPKKKPVSRSVKAGLQFPVGRIGRFLKKGRYAQRVGSGAPVYLAAVLEYLAAEVLELAGNAARDNKKNRIIPRHLLLAVRNDEELGKLLAGVTIAHGGVLPNINPILLPKKTGGEKAPKSPSKATKSPKKA	0.885271	0.249869	0.773023	0.024044	#N/A	#N/A	#N/A	#N/A	#N/A	#N/A	#N/A	#N/A	#N/A	#N/A	#N/A	#N/A	#N/A	#N/A
Solyc01g099410.3.1	Histone H2A	H2A3	146	15.3	10.55	MDATKTTKGAGGRKGGPRKKSVTKSIKAGLQFPVGRIGRYLKKGRYAQRVGSGAPIYLAAVLEYLAAEVLELAGNAARDNKKSRIIPRHVLLAVRNDEELGKLLAGVTIASGGVLPNINPVLLPKKSAVAEEKSPKAKAGKSPKKA	0.966732	0.678874	0.848663	0.0125296	#N/A	#N/A	#N/A	#N/A	#N/A	#N/A	#N/A	#N/A	#N/A	#N/A	#N/A	#N/A	#N/A	#N/A
Solyc03g071620.2.1	Histone H2B	H2B	145	15.9	9.98	MAPKAEKKPAEKKPAAEKAPAEKKPKAGKKLPKDGAAAAADKKKKRVKKSVETYKIYIFKVLKQVHPDIGISSKAMGIMNSFINDIFEKLAQESSRLARYNKKPTITSREIQTAVRLVLPGELAKHAVSEGALCCCFGRSSQLLW	0.958759	0.793086	0.87166	0.0399966	#N/A	#N/A	#N/A	#N/A	#N/A	#N/A	#N/A	#N/A	#N/A	#N/A	#N/A	#N/A	#N/A	#N/A
Solyc09g083380.5.1	Histone H1	H1	192	20.2	11.05	MVSATASAKKTSAPKKPRSHPPYVEMISEAITTLKERTGSSQVAIAKFIEEKQKGLPPNFRKLLLVQLKKLVASGKLTKIKSSFKVSPVVKPAAVVKPKKAPATKKKSTSSTATAAAKPKVTAPKKKVVVKKAKPAAAAAPAKKAKKPATAPAKAKKTPVKKAAVAKVKKTPAKKVVKKPKTIKSPAKKAKK	1.03354	0.84122	0.805956	0.0144108	#N/A	#N/A	#N/A	#N/A	#N/A	#N/A	#N/A	#N/A	#N/A	#N/A	#N/A	#N/A	#N/A	#N/A
Solyc05g047520.4.1	Helicase	DHX	936	105.2	7.05	MESSPAAVKRKEPEVNSDEKEEVSVACLERNESILVSAHTSAGKTAVAEYAIAMSFRDKQRVIYTSPLKALSNQKYRELSHEFSDVGLMTGDVTLSPNASCLVMTTEILRGMLYRGSEVLKEVAWVIFDEIHYMKDRERGVVWEESIIFLPPAIKMVFLSATMSNATQFAEWICNIHKQPCHVVYTDFRPTPLQHYMFPMGGSGLYLVIDENEQFREVNFLKMQDSFAKKKVGDGSNNANARVRGRIAKGGSTSGGVSDICKIVKMIMERKFQPVIVFSFSRRECEQHAMSMPKLDFNTEEEKEVVKEVFHNAVDCLSEEDRNLPAIELMLPLLQRGIAVHHSGLLPVIKELVELLFQEGLIKALFATETFAMGLNMPAKTVVFTSVKKWDGDSHRYIG…	0.998999	0.992306	0.895597	0.00849853	#N/A	#N/A	#N/A	#N/A	#N/A	#N/A	#N/A	#N/A	#N/A	#N/A	#N/A	#N/A	#N/A	#N/A
Solyc03g117040.3.1	XH/XS domain-containing protein	FDM	634	73.6	6.29	MSSSSGEESDLSDSEIFEFKEKPYEELRTGKLKVKGPNGSLRCPFCAGKKKQDYKYKDLLQHATGVGKGSANRSAKQKANHLALAKYLETDLVNEAEPIPKRAVTPEHSEAEKDKLFFWPWTGIFVNVSKETANGRSPDDKEYWLKKFSMYMPLEVKLFCDNQARVSEAIVRFNSNWTGFKGAMEFEKSFEASHCSKQEWKSLRKCPGPNLYGWVAREDDYKAEGALGEYLRETGELKTISDLMKEETQGRKKVVANLANEIDMKNENLDELQTKFNLNTLSLRQMLAEKDMLHRSFFEESRKMQRLAREHVQKVLMEQEMLSIELESKKKKLDSWVRELNKREALTEREKQKLDEEKKQNDVRNSALQMASVEQRKADENVLRLVEEQKREKEEALKK…	0.819662	0.147945	0.795084	0.0115488	#N/A	#N/A	#N/A	#N/A	#N/A	#N/A	#N/A	#N/A	#N/A	#N/A	0.406126	5.14919e-09	0.267943	1.51131e-09
Solyc06g068140.3.1	Methyl-CpG-binding domain-containing protein .1	MBD	353	38.4	4.96	MASPMEKGSHDDEIVSVELPAPPSWKKLFTPKQGGTPKKSEVVFIAPTGEEVKNRKQLEQYLKAHPGSPGISEFDWSTGETPRRSARISEKVKAMRPPSLLESPKKKRRTSSGTKKDSKEKAAAKAEMGSAETKGMESSKEENENLEKKAGEAEAEMQDKGKKEAEAVVEDERIEDAKLPPAEKPDSESEEFHSADDGNQDKSENAEAEMEDKKKKEVEAVEKDKCLKGAELPSGDEREPESEEVHSADVGRHKSENAGIEEKQVSEEKLESQNKLEELAAEGTNVTVGGSAGQAEHAVDGVSKDAHSNDGEDGPKEEEKKTEGTELAMENNNINQPGLVHPQQHQSPAPISC	0.954545	0.771916	0.824351	0.000416168	#N/A	#N/A	#N/A	#N/A	#N/A	#N/A	#N/A	#N/A	#N/A	#N/A	0.435275	3.99297e-09	#N/A	#N/A
Solyc10g051373.1.1	RNA-binding protein	RBP1	163	16.5	9.14	MSAEVEYRCFVGGLAWATNDRTLGEAFSQYGNVVDSKIINDRETGRSRGFGFVTFTDEKSMRNAIEAMNGQNLDGRNITVNEAQSRGSGGGGGFGGGRRGGGGFGGGGGGYNGGGGYGRREGGNGGGYGGGRDRGYGGGGDRYGGGGDRYSRGGGASEGSWRN	1.02032	0.780882	0.851064	0.00834711	#N/A	#N/A	#N/A	#N/A	#N/A	#N/A	#N/A	#N/A	#N/A	#N/A	#N/A	#N/A	#N/A	#N/A
Solyc05g006070.4.1	RNA-binding (RRM/RBD/RNP motifs) family protein	RBP2	408	46.2	5.44	MLSLGSYPRQPHCCASTISQCLPLFCKIPQPQLFFTSNTVTHLRIRSLIEQKRTGVCVFARKDEEKRGNSVVEMEEIEDFDDDYDDDDDDFLGDEEEVDGDDDDDDEVIIPLRNMKKWLENKPRGFGVDKEYDTSVEDKLMEEIEQSRKAQLANINKLKNNPVKANTKQVQQDKVVQDGLCVRLVNLPKKMNVDKDLRVAFKGVSGIVNIVPVVTGNKKTRNPVCKGMAYINFKSKDEAQRFVQMFSGRSISFGKVQKQIKCEMINPGSPKSTTTQSVHKIKHVPEKDIPDLSRDQDDDFDTDFLSDSEKNISTDYNVAEVEDLSAYTNGYEENSSAESTSGDEQDVGEESEFAEQKKVEAKEKKKRPKQKKEQVPKLNIPGSARKLKIKEKAVLTGVL…	0.883105	0.00993471	0.909893	0.0111487	#N/A	#N/A	#N/A	#N/A	#N/A	#N/A	#N/A	#N/A	#N/A	#N/A	#N/A	#N/A	#N/A	#N/A
Solyc03g119130.3.1	HMG-Y-related protein A	HMGA	518	54.6	9.86	MDPSMDLPMDIEQPTYNPPQLVNHDLNPPPQDPTLAPDFSFPEPDYAELITAAITALKEKEGSSRVAIAKYIDRVHPNLPPNHSALLTHHLKRLKNSGYLAMVKHSYLLATPGSAPPPPEAAAVDSNGGDATPSKRKPGRPPKSKPDAQYQDPFQGAQIQAQQQQQAEFQPQFVPQPQFQQFQPDPLLQNQILFQSQQQPQGFAAPHEAENYTNLGAQSVFVSLGLADGPVGVQNPGGSVPSPAGTPAPASNNKRRSGRPRKDGSTVVRSLETKSPEQSGTKRRPGRSAKTGTVNASSPASAAASSKPRGRPKKGSTPGRRGRPRKNVSVSVNADAANIPSGNPNIPVGGSDLTAQTPTPKRRGRPAKSNNQGGPAAASVGVTDVPIAAAFDSEGFPNT…	0.949179	0.525176	0.864583	0.00874719	#N/A	#N/A	#N/A	#N/A	#N/A	#N/A	#N/A	#N/A	#N/A	#N/A	#N/A	#N/A	#N/A	#N/A
Solyc06g030570.3.1	Dual-specificity RNA methyltransferase RlmN	RlmN	408	45.3	9.31	MAMGLLQSGCSVSFARALRSRTFTTISSTVTVPSLKKASQMETRFLLGLSEEQLQQLSLDFGQKSFRGKQLYHLLYKRKVKEIQEFSQLPLEFRNDLEEAGWRVGRSPIHKAVTAADGTTKLLIKLEDNRLVETVGIPVKDNDGSSRLTACVSSQVGCPLRCSFCATGKGGFSRNLKSHEIVEQVLAIEELFKQRVTNVVFMGMGEPMLNMKEVLEAYRCLNKDILIGQRMITISTVGVPNTIKKLASYKLQSTLALSLHAPNQSLREKIVPSAKSYPLNAIMKDCRDYFLETRRRVSFEYTLLAGVNDSVKHAIELAELLHEWGRGHHVNLIPFNPIDGSEYKRPSKKSVIAFVSALESRKVTASVRQTRGLDASAACGQLRNEFQKSPLLSGSIDQE…	0.95487	0.407592	0.864935	0.0126699	#N/A	#N/A	#N/A	#N/A	#N/A	#N/A	#N/A	#N/A	#N/A	#N/A	0.267943	2.8944e-17	0.353553	1.25118e-07
Solyc03g083430.3.1	Splicing factor SF3a60 homolog	SF3a60	509	59.7	5.19	MSSTLLEVTRASHEEVERFERLIVKDLQTEPATNKDRLHQSHRVRNMIEQIIDTTHKLVDIYEDKDGARKDEIAALGGQTATGTNVFSAFYDRLKEIREYHRRHPAARAIIDTGDEYEQLLKEEPQIEFSGEEGSGRYLDLHELFNEYINSKFGEPIEYTAYLNVFSEPQKIPRKAKTTRRYLEYLQKLLEYLVYFFERTEPLQDLDRIFSKVTSEFEEEWTLGKVEGWENNGQENGSAPENYTVIDLDYYSTAEELMVVGPEKLKEALGALGLKTGGTIQQRAERLFLTKNISLEKLDRKHFAKGSWKPEQNSVVATSHVGDVKEIALLEAKIRRLCDLLDETIVRTRENVEKKQALTYEEMEAEREEDDVQAESESDDEDQQIYNPLKLPMGWDGKP…	1.0921	0.398314	0.901698	0.0145642	#N/A	#N/A	#N/A	#N/A	#N/A	#N/A	#N/A	#N/A	#N/A	#N/A	#N/A	#N/A	#N/A	#N/A
Solyc03g063200.3.1	Zinc finger transcription factor 25	ZF-TF25	280	29.9	9.39	MEIRKRNRNESGFNGNAGFKKAKPEMDSLSSGIGSKSKPCTKFFSTVGCSFGENCHFLHYVPGGYNVVAKMMNIAPSPASPIPSGNTPAVKTKICSKFNTAEGCKFGDKCRFAHGEWEIGKPIVPSPRAMGVGPIPDRFGGRRESPVASFGTSATAKISVDAFHVGPIIGKGGVNSKHICWQTGAKLAIREHEMDKNLRNIELEGTFEQISQASAMVRELISNLGSVGGPGRTAAVQGGRAPPMNNYKTKLCENFAKGSCTFGERCHFAHGDAELRKTGG	0.96856	0.541665	0.833173	0.00986699	#N/A	#N/A	#N/A	#N/A	#N/A	#N/A	#N/A	#N/A	#N/A	#N/A	#N/A	#N/A	#N/A	#N/A
Solyc01g014850.4.1	Zinc finger transcription factor 7	ZF-TF7	232	25.7	9.25	MFQMHGRYGSRPETNPTGLGAAASFGSSATAKISVDASLAGRIIGKGGVNSKHICRVTGAKFSIRDNESDPNLRNIELEGTIDQIEQASRMVRELIQSVTTSAAPPMKNSSSSVTSNYKKKFVRTSPRVHALLEKSATLHMEQKNCASQVREICCILLLGSIPPLWHCYLFYFGFVKTVDKVFLPLEYLGLEAFYLLRSLMCSISLLGSLFFMFAVPLIITYLLLSIWILKI	0.939922	0.479295	0.90084	8.40622e-06	#N/A	#N/A	#N/A	#N/A	#N/A	#N/A	#N/A	#N/A	#N/A	#N/A	#N/A	#N/A	#N/A	#N/A
Solyc09g059310.3.1	Nuclear transport factor 2 (NTF2) family protein with RNA binding (RRM-RBD-RNP motifs) domain-containing protein	NTF21	474	51.2	5.54	MAAAQPPVSAQVVGNAFVQQYYHILHHSPGLVFRFYQDISKLGRPEDDGSMSITSTMQAINDKILSLNYADFRAEIKSVDSQESFNGGVHVLVTGYLTGKDNLIRNFSQTFFLAPQDRGYFVLNDMFRYVEIANQQDAVQVPETDVLAPVTPEQIVVDPSPAQENHISDQSTPSAEEANGGEVYNPPQNDNVPDMVEEVPVAEVVDEVQGDSTMVAETNIIIEEVPKKSYASIVMHLKESAATFSPPPAPAPRKIVPKNVEHVRQLLAPAPADSPALSSDFVDNVNNQEGEADGHSIYIKGLPMSATTAMLEDEFKKFGPIKNGGIQVRSNRQQGFCFGFVEFEVETAVQKAIEASPILIGGRQAAVEEKKSTSSRGNTRGRYPSGRGNGVRNDGVRGR…	1.04653	0.23095	1.10057	0.0411133	#N/A	#N/A	#N/A	#N/A	#N/A	#N/A	#N/A	#N/A	#N/A	#N/A	#N/A	#N/A	#N/A	#N/A
Solyc09g011730.5.1	Nuclear transport factor 2 (NTF2) family protein	NTF22	357	40.9	7.71	MKKAQLLEAQFPFPPTKHMSNEFHVYLWLLPFPLTHFLFAFNIRKLSSFCSVYSYEISFSLQLITSFSFLYRNHLELTLFTMWSAPNLQAMSLRPRIIQPHFCNDGCTKFRQHMFLAWSSINRVEINHCFTSHLHMQCCAVLADTTKIVSDNFRGNRSFDSKARTFKPFGQASHSLLLGRCQVRSEDSEGTLSGESILQNEETLARDLRTAIKEENYAQAAKIRDRLRLLQENSNASVLAANARFYNAFKTGDLAAMQALWSRGENTCIVHPGVSGISGYDLVMGSWEFVWAEYDFPLEIEIRDVQVHVRGDLGYVTCVEMVKTKGSSWGKQFATNVFEKVDGQWFICIHHASYIDL	0.972184	0.683621	1.11613	0.0141295	#N/A	#N/A	#N/A	#N/A	#N/A	#N/A	#N/A	#N/A	#N/A	#N/A	#N/A	#N/A	#N/A	#N/A
Solyc01g111780.5.1	Transportin-1	TRN1	890	99.2	4.94	MAASGTWQPQEQGFKEICGLLEQQMSPTSDNCQIWQQLQHYSQFPDFNNYLAFIFAHAEGKSVDIRQAAGLLLKNNLRSAFQNMPLANQQYIKSELLPSLGAADRHIRSTAGTIISVLVQIDGVAGWPELLQALVSSLDSSDVNHVEGAMDALSKICEDVPQLLDSDISGLSERPITVFLPRFLLLFQSPHASLRKLSLSSVNQYIMLMPKILHLSMDKYLQGLFLLANDPAPEVRKLVCAAFVQLIEVRPAVLEPHLRNVLEYILQVNKDPDEEVALEACEFWSAYCDAQLPPENLREFLPRLIPVLLSNMVYADDDESLLEAEEDGSLPDRDQDIKPRFHSSRFHGSEDGEDDDEDIVNVWNLRKCSAAALDILSNVFGDDILPTLMPVVQAKLSCS…	1.07504	0.0195592	1.10846	0.01707	#N/A	#N/A	#N/A	#N/A	#N/A	#N/A	#N/A	#N/A	#N/A	#N/A	#N/A	#N/A	#N/A	#N/A
Solyc02g069260.3.1	Argonaute2a	AGO2a	1042	115.9	9.29	MDRGNYRRGGGHDNAGRGGGNRGRGQGRGGGRGEPQIGGGRGGTHIGGGSQMGQPPQQWGNQPRGSGQYQIRGGAPQNQPGQNYPVNQNPGRGGTWVNQPVQRGGGGGGSAWPRPQQQGSGVPNTTWPRPPPQQQGSGSGVANAWARPPPQRSQQHGGGNQQQVVDRSPPQSSDPVQVDLGSLKITDQSPSSRQESSKEKRVPIARPDTGKIAVKSIALLANHFPVRFNPQSTIMHYDVDIQQRADGNRPVKKLTNKSVLHMIREKLCADDPTRFPLDKTAYDGKKNIFSAVQLPTGCFAVNWSDGEDARLRSYDITIKLVAELKLCKLKEYLSGSLSHIPRDILQGMELVMKENPTRCRTSVGRCFYSNEHLPDHDFRFGVAAYRGFQQSLKPTKGGL…	1.0122	0.58792	1.13484	0.0110376	1.63	0.64284	5.38	1.29025e-11	#N/A	#N/A	2.63902	4.19469e-09	4.28709	2.98395e-18	3.4822	1.0442e-05	2.14355	0.000236696
Solyc09g089720.4.1	2-oxoglutarate (2OG) and Fe(II)-dependent oxygenase superfamily protein	2OGX	699	78.3	6.11	MEISSTDDFQTIIQRSYDKMSELKAFDGTKAGIKGLVDAGITKVPRIFMLPPKHRPESSDTCETQFIFPVIDLEGIAKDPSIKRLWTKFDMRQRHGVSSKWLIMTFQYLSWKKCCKEHESFLSKILSPSVPAANWRDTLFCLMAPNPPSPEEVPTACSETLMEFSDHIMKLGKSMFELLSEGLGLNTSHLNDIGCAEGLVVLGHYYPECPQPELTMGTSKHSDNSFITVLLQDHIGGLQVLHQNHWVDVPPTPGPVPSSNLYGPITELLSKDNPPKYRATTVNDYSAYYRKKGSKSLRNSIVYNIVTKKMVVSSTDEFQATVQKSYDKMSELKAFDDTKAGVKGLVDAGITKVPQIFILPPNNRTESLDTSEKQFIFPVIDFEGIDEDPIKRKEIVGKV…	1.08726	0.0152213	1.34367	7.31087e-05	#N/A	#N/A	#N/A	#N/A	#N/A	#N/A	#N/A	#N/A	#N/A	#N/A	#N/A	#N/A	#N/A	#N/A
	Protein synthesis										#N/A	#N/A	#N/A	#N/A	#N/A	#N/A	#N/A	#N/A	#N/A	#N/A	#N/A	#N/A	#N/A	#N/A
Solyc12g099960.1.1	Ribosomal protein-like protein	RPL	156	17.3	9.66	MAKPSQPIRNEKEEIKETDTTASTNNNESSKKKVTRKLPSARELVSHYESQGVDSQEASYKVIEDLQGALFRVISTSRNDKNRNNNRNVSSETSRKLDVINARLLSLDMKVDSKPGYPQTLAIGMASGGLLQVLPRVAESVVQIWNSVRNATNSKQ	0.972848	0.611524	0.900662	0.0294947	#N/A	#N/A	#N/A	#N/A	#N/A	#N/A	0.406126	6.40067e-05	0.287175	8.4323e-06	0.217638	2.43344e-07	0.108819	5.51693e-12
Solyc07g061900.3.1	50S ribosomal protein L4	RPL4	288	32.1	7.4	MATSSSLSFFSSTIFFSNSNTLHSSKQQQQKQLIFKPKQQQFSIRSEAAAATIPILSFDGTEVGSTTLNLKSAPLDTARAVVHRGLTTDLRNQRRGTASTLTRAQVRGGGIKPYPQKKTGRARRGSNRTPLRPGGGVVFGPKPKDWSVKINKKEKRLAISTALSSATQNAIVVEEFDDKFEKPKTKEFIDLMRRWGLDPKEKSLFLMTEVSDNVILSSRNISTLKMLTPRTLNLFDILDSEKLVFTKSAVEFLNERYGNDDDDDDDWEVVDEEEEDGGEVEESAESSE	1.22648	0.105939	0.683055	0.00743047	#N/A	#N/A	#N/A	#N/A	#N/A	#N/A	0.406126	0.000385622	0.233258	8.59129e-09	0.0334929	1.03678e-114	0.0544094	2.65551e-17
Solyc04g008460.4.1	Ribosomal protein L15	RPL15	204	24.2	11.49	MGAYTYVSELWRKKQSDVMRFLQRVRCWEYRQLPSIVRVTRPTRPDKARRLGYKAKQGYVVYRVRVKRGGRKRPVSKGIVYGKPTNQGVTQLKFQRSKRSVAEERAGRKLGGLRVLNSYWINEDSTYKYFEVILVDQAHAGIRNDPRINWICNPVHKHRELRGLTSAGKKYRGLRGRGHLHHKARPSRRATWKRNQTLSLRRYR	1.15326	0.242766	0.883976	0.0123418	#N/A	#N/A	#N/A	#N/A	#N/A	#N/A	#N/A	#N/A	#N/A	#N/A	#N/A	#N/A	#N/A	#N/A
Solyc09g075430.3.1	Ribosomal protein L19	RPL191	218	25.2	11.5	MVSLKLQKRLAASVLKCGRGKVWLDPNEGNEISMANSRQNIRKLVKDGFIIRKPTKIHSRSRARRMKEAKRKGRHSGYGKRKGTREARLPTKVLWMRRLRVLRRLLRKYRESKKIDKHMYHDMYMKVKGNVFKNKRVLMENIHKTKAEKAREKTLSDQFEARRAKNKASRERKFARREERLAQGPGEKPVQPAAPAPAPAATAPPAKTAQGGSKKSKK	1.15074	0.291954	0.799938	0.00948125	#N/A	#N/A	#N/A	#N/A	#N/A	#N/A	#N/A	#N/A	#N/A	#N/A	#N/A	#N/A	#N/A	#N/A
Solyc06g009210.5.1	Ribosomal protein L19	RPL192	213	24.7	11.5	MVSLKLQKRLAASVLKCGRGKVWLDPNEGNEISMANSRQNIRKLVKDGFIIRKPTKIHSRSRARRMKEAKRKGRHSGYGKRKGTREARLPTKVLWMRRLRVLRRLLRKYRESKKIDKHMYHDMYMKVKGNVFKNKRVLMENIHKTKAEKAREKTLSDQFEARRAKNKASRERKFARREERLAQGPGGEKPVQPAAPAAAAPAQPAQGSKKSKK	0.998048	0.982554	0.842876	0.00287872	#N/A	#N/A	#N/A	#N/A	#N/A	#N/A	#N/A	#N/A	#N/A	#N/A	#N/A	#N/A	#N/A	#N/A
Solyc02g087930.3.1	60S ribosomal protein L34	RPL34	120	13.8	11.6	MVQRLTYRKRHSYATKSNQHRIVKTPGGKLIYQTTKKRASGPKCPVTGKRIQGIPHLRPAEYKRSRLPRNRRTVNRAYGGVLSGSAVRERIIRAFLVEEQKIVKKVLKIQKAKEKLASKS	0.97636	0.762165	0.907707	0.00031391	#N/A	#N/A	#N/A	#N/A	#N/A	#N/A	#N/A	#N/A	#N/A	#N/A	#N/A	#N/A	#N/A	#N/A
Solyc03g112850.3.1	60S ribosomal protein L44	RPL44	105	12	10.27	MVNVPKTKKTYCKSKECKKHTLHKVTQYKKGKDSLAAQGKRRYDRKQSGYGGQTKPVFHKKAKTTKKIVLRLQCQGCKHVSQHPIKRCKHFEIGGDKKGKGTSLF	1.02231	0.589381	0.902167	0.0488837	#N/A	#N/A	#N/A	#N/A	#N/A	#N/A	#N/A	#N/A	#N/A	#N/A	#N/A	#N/A	#N/A	#N/A
Solyc06g064470.5.1	60S ribosomal protein L7a	RPL7A	258	29.3	10.3	MAPKKGVAVAAKKKPEKSKVVNPLFEKRPKQFGIGGALPPKKDVTRNVRWPRNVTLQRKKRILKMRLKVPPALNQFTKTLDKNLATTLFKMLLKYRPEDKAAKKERLVKRAQAEAEGKTPETKKPIIVKYGLKHITYLIEQNKAQLVVIAHDVDPIELVVWLPALCRKMEIPYCIVKGKARLGSIVHKKTASALCLTTVKNEDKMEFSRVLEAIKANFNDKYEENRKKWGGGIMGSKSQARTKAKERVLAKEAAQRLN	0.976797	0.806408	0.908497	0.00243647	#N/A	#N/A	#N/A	#N/A	#N/A	#N/A	#N/A	#N/A	#N/A	#N/A	#N/A	#N/A	#N/A	#N/A
Solyc06g071720.1.1	60S ribosomal protein L27a	RPL27A	148	16.4	10.59	MTTRFKKNRKKRGHVSAGHGRIGKHRKHPGGRGNAGGMHHHRILFDKYHPGYFGKVGMRYFHKLRNKFYCPTVNIDTLWSLLPQEVKDKAAANKGTAPLIDVTQFGYFKVLGKGVLPTGQPVVVKAKLVSKNAEKKIKENGGAVVLTA	0.906002	0.0383141	0.955859	0.0815778	#N/A	#N/A	#N/A	#N/A	#N/A	#N/A	#N/A	#N/A	#N/A	#N/A	#N/A	#N/A	#N/A	#N/A
Solyc09g005720.3.1	60S ribosomal protein L23a	RPL23A	153	17.2	10.26	MAPKADSTKKSDPKAQAVKAAKAVKSGSTFKKKSQKIRTKVTFHRPRTLKKDRSPKYPRVSAPGRNKLDQYAILKYPLTTESAMKKIEDNNTLVFIVDIKADKKKIKAAVKKMYDIQTKKINTLIRPDGTKKAYVRLTPDYDALDVANKIGII	0.974392	0.613379	0.881686	0.021167	#N/A	#N/A	#N/A	#N/A	#N/A	#N/A	#N/A	#N/A	#N/A	#N/A	#N/A	#N/A	#N/A	#N/A
Solyc09g082520.3.1	40S ribosomal protein S3a	RPS3A	260	29.6	9.83	MAVGKNKRISKGKKGGKKKAADPYAKKDWYDIKAPSVFGVRNVGKTLVTRTQGTKIASEGLKHRVFEVSLADLQNDEDHSFRKIRLRAEDVQGRNVLTNFHGMDFTTDKLRSLVKKWQSLIEAHVDVKTTDSYTLRMFCIGFTKKRPNQQKRTCYAQSSQIRQIRRKMREIMVNQAQSCDLKDLALKFIPESIGREIEKATSSIYPLQNVFIRKVKILKAPKFDLGRLMEVHGDYSEDVGVKVDRPAEDIATEPTEVVGA	0.910875	0.0426691	0.874196	0.0115552	#N/A	#N/A	#N/A	#N/A	#N/A	#N/A	#N/A	#N/A	#N/A	#N/A	#N/A	#N/A	#N/A	#N/A
Solyc12g096300.2.1	40S ribosomal protein S6	RPS6	249	28.3	10.64	MKFNIANPTTGCQKKLEIDDDQKLRAFFDKRISQEVSGDALGEEFKGYVFKIMGGCDKQGFPMKQGVLTPGRVRLLLHRGTPCFRGYGRRNGERRRKSVRGCIVSPDLSVLNLVIVKKGENDLPGLTDTEKPRMRGPKRASKIRKLFNLGKDDDVRKYVNTYRRTFTNKKGKEVSKAPKIQRLVTPLTLQRKRARIADKKKRIAKAKSEAADYQKLLASRLKEQRERRSESLAKKRSRLSAASKPSIAA	0.962111	0.69611	0.869495	0.0152401	#N/A	#N/A	#N/A	#N/A	#N/A	#N/A	#N/A	#N/A	#N/A	#N/A	#N/A	#N/A	#N/A	#N/A
Solyc06g069090.3.1	40S ribosomal protein S7	RPS7	191	22.1	9.8	MYTSKQKIHKDKDAEPSEFEVTVAQAFFDLENTNQELKSELKDLYINSATQIDVSGNRKAVVIHVPYRLRKAFRKVHVRLVRELEKKFSGKDVIFIATRRIVRPPKRGSAAQRPRTRTLTSVHDAILEDLVVPAEIVGKRTRYRVDGSKIMKVYLDPKERNNTEYKLETFSAVYRKLSGKDVVFEYPITEA	0.977549	0.704143	0.805218	0.00557354	#N/A	#N/A	#N/A	#N/A	#N/A	#N/A	#N/A	#N/A	#N/A	#N/A	#N/A	#N/A	#N/A	#N/A
Solyc00g500075.1.1	30S ribosomal protein S11, chloroplastic	RPS11	138	14.9	12.28	MAKAIPKISSRRNGRISSRKGARRIPKGVIHVQASFNNTIVTVTDVRGRVVSWSSAGTSGFKGTRRGTPFAAQTAAANAIRTVVDQGMQRAEVMIKGPGLGRDAALRAIRRSGILLTFVRDVTPMPHNGCRPPKKRRV	0.981091	0.630671	0.8354	0.00720767	#N/A	#N/A	#N/A	#N/A	#N/A	#N/A	#N/A	#N/A	#N/A	#N/A	#N/A	#N/A	#N/A	#N/A
Solyc00g500055.1.1	30S ribosomal protein S14, chloroplastic	RPS14	125	14.5	10.8	MDTNRNSTIMARKSLIQREKKRQKLEQKYHSIRRSSKKEISKVPSLSDKWEIYGKLQSLPRNSAPTRLHRRCFLTGRPRANYRDFGLSGHILREMVHACLLPGATRSSCSYLWRGVEQFGSSQGS	1.06603	0.227522	0.84297	0.0102246	#N/A	#N/A	#N/A	#N/A	#N/A	#N/A	#N/A	#N/A	#N/A	#N/A	#N/A	#N/A	#N/A	#N/A
Solyc05g009220.3.1	Glutamine--tRNA ligase	GlnRS	790	90.2	6.7	MVKEDSNVLDLFLKIGLDEKTAKNTLANNKVTTNLTAVIHEAAVTDGCDRAVGNLLYTVATKFPANALNHRPTLLQYIVSTKIKTPAQLEAAFAFLASTASENLKVHDFEEACGVGVEVSKDDIERAVSEVFEEKKTNILEQRYRINVGELFGHVRKKLPWADPKVVKEVVDLELYKLLGERTAADNEKPVKKKKEKPAKTEAKAKVEETSAPKQSEEELNPYLIFPTPEENFKVHTEVYFSDRPVLRACNSKELLEKHLKVTGGKVLTRFPPEPNGFLHIGHAKAMFVDFGLAKERGGGCYLRFDDTNPEAEKKEYIDHIKEIVGWMGWEPFKITYTSDYFQDLYELAVELIRRGHAYVDHQTADEVKEYREKKMNSPWRDRPIEESLRLFDEMKKGM…	1.08949	0.246601	0.9	0.0469268	#N/A	#N/A	#N/A	#N/A	#N/A	#N/A	#N/A	#N/A	#N/A	#N/A	#N/A	#N/A	#N/A	#N/A
Solyc02g070650.2.1	60S ribosomal protein L18a	RPL18A	178	21.4	10.24	MVTYKFHQYQVVGRALPTETDEHPKIYRMKLWATNEVRAKSKFWYFLRKLKKVKKSNGQMLAINEIFEKNPTTIKNYGIWLRYQSRTGYHNMYKEYRDTTLNGGVEQMYTEMASRHRVRHHCIQIIKTATIPAKLCKRESTKQFHDSKIKFPLVFKKVRPPSRKLKTTYKATKPNLFM	1.09881	0.128267	1.10097	0.0064361	#N/A	#N/A	#N/A	#N/A	#N/A	#N/A	#N/A	#N/A	#N/A	#N/A	#N/A	#N/A	#N/A	#N/A
Solyc05g005800.5.1	Threonine--tRNA ligase, cytoplasmic	ThrRS	725	83.4	7.8	MLLASPLCWRLFTQSIRRPPPPCKHFSILRRCFSSTPPMGKTAKSCEANSSASIPKDETYLENVIPKRIALFESIQNQQRLQRLALSPDPIKIELVDGTIKEGKKWNTTPLDIAKEISKSLAANALIAKVNGVLWDLSRPLEGDCKLEIFKFETDEGRDTFWHSSAHILGESLERTFGCKLCIGPCTTRGEGFYYDAFYGDLGLNEDHFQRIKEEATKAVSEKQPFERIEVSRQQALDMFSDNRFKVEIIKDLPEDKTITVYRCGPLVDLCRGPHIPNTSFVKALACTKASSAYWRGDKDRESLQRVYGISFPDQKQLKVYLDMLAEAKKYDHRELTKKQELFFFHPLSPGSCFFLPHGARICNKLLEFIKSQYWKRGYKEVWSPNMYNMQLWETSGHA…	1.09036	0.086703	1.11562	0.00727524	#N/A	#N/A	#N/A	#N/A	#N/A	#N/A	#N/A	#N/A	#N/A	#N/A	#N/A	#N/A	#N/A	#N/A
Solyc05g056250.3.1	Aspartate--tRNA ligase, cytoplasmic	AspRS	544	60.9	6.49	MESEKPQNPSPMEPQEEGSNKISKKEAAKLERQRRRQEAAAAAAATAVSTVSIEESDPLSGNYGDVELNDLQSKAVTGRKWTEVGSIAPEMKDRVVLVRGRVQTIRPVGKKIAFVVVRERGFTVQCVLTVKPELVSSQMVKYATSLSKESIIDVEGVVTIPEKPITGATQQQVEVQISKLYCVNRAVPTLPINIEDAARSEVEIEQALEKGEQLVRVNQDTRLNFRILDMRTPANQGIFRIQCQIENIFRQFLLSEGFVGIHTPKLIGGSSEGGSAVFRLDYKGQPACLAQSPQLHKQMAICGDFGRVFEVGPVFRAEDSFTHRHLCEFTGLDVEMEIKEHYSEVMDIVDRLFVAMFDSLNEKCKKELEAVGKQYPFEPLKYLRKTLRLTFAEGIQMLK…	1.05361	0.0304601	1.11668	0.0118954	#N/A	#N/A	#N/A	#N/A	#N/A	#N/A	#N/A	#N/A	#N/A	#N/A	#N/A	#N/A	#N/A	#N/A
Solyc05g054310.4.1	Elongation factor	eEF	477	52.2	8.4	MSRKGLMEQDLSKLDVTKLHPLSPEVIARQATINIGTIGHVAHGKSTVVKAISGVQTVRFKNELERNITIKLGYANAKIYKCEEERCPRPACYKAYGSGKEDNPMCDVPGFENCKMKLLRHVSFVDCPGHDILMATMLNGAAIMDGALLLIAANESCPQPQTSEHLAAVEIMRLQHIIILQNKVDLVQENVAINQHEAIQKFIQGTVADGAPVVPISAQLKYNIDVVCEYIVKKIPIPERNFISPPNMIVIRSFDVNKPGFEVDDIRGGVAGGSILKVSFSISAINDMMQGVLKVNQLIEIRPGIVVKDESGNIKCTPIYSRIVSLFAEQNELQFAVPGGLIGVGTTMDPTLTRADRLVGQVLGEVGSLPEVYVELEVNFFLLRRLLGVRTKDSERQGR…	1.14018	0.0151013	0.988897	0.659612	#N/A	#N/A	#N/A	#N/A	#N/A	#N/A	#N/A	#N/A	#N/A	#N/A	#N/A	#N/A	#N/A	#N/A
Solyc01g098000.3.1	Elongation factor 1-delta	eEF1d	241	26.1	4.68	MAVAFQNVNSESGLKKLDDFLLTRSYISGYQASKDDITVYSYLAKPPSAEYVNALRWYKHIDALLRISGVSGVGAGVIVEGSAPITGAVATPPADDSKASAADDDDDDDDVDLFGEETEEEKKAAEERAAALKASGKKKESGKSSVLMDVKPWDDETDMKKLEEAVRSVTMEGLTFGASKLVPVGYGIKKLQIMLTIVDDLVSVDDLIENYLTVEPINEYVQSCDIVAFNKICKISAVLKF	1.1416	0.0169757	1.0253	0.267798	#N/A	#N/A	#N/A	#N/A	#N/A	#N/A	#N/A	#N/A	#N/A	#N/A	#N/A	#N/A	#N/A	#N/A
	Protein folding and transporting										#N/A	#N/A	#N/A	#N/A	#N/A	#N/A	#N/A	#N/A	#N/A	#N/A	#N/A	#N/A	#N/A	#N/A
Solyc11g065740.2.1	Chaperonin-like RbcX	RbcX	213	24.4	9.1	MVGAFSVVGSPMVDSHSSPCLCLDALPTCNLGIGDSLVRKQKQLPRLGTMELSTSFVDLRFSAKCVKGNYKNLKKQTKGRKNLRIVNDLGGQYEESFSDIKTQILNYFTYKAVRTVLNQLNEMNPPQYHWFNDYVTANKPSDGKRFIRNLAKEKQELAEKVMATRLSLYAKWIKKCDHEEIYNRISDQNVEVMRERLMETVIWPSDDTNTGMK	0.891269	0.00838562	0.944174	0.0435037	#N/A	#N/A	#N/A	#N/A	#N/A	#N/A	0.406126	6.46154e-07	0.287175	3.57193e-12	#N/A	#N/A	#N/A	#N/A
Solyc04g081570.3.1	Heat shock protein 90	Hsp90	812	93.3	5	MRKWKIPFVLFLLCLIYLVPDQGRKIQANAEADSDAPVDPPKVEEKFGAVPNGLSTDSDVAKREAESMSRKTLRASAEKFEFQAEVSRLMDILINSLYSNKDIFLRELISNASDALDKIRFLALTDKEVLGEGDNTKLEIQIKLDKEKKILSIRDRGVGMTKEDLRKNLGTIAKSGTSAFVEKMQTSGDLNLIGQFGVGFYSVYLVADYVEVISKHNDDKQYVWESKADGAFAISEDTWNEPLGRGTEIRLHLRDEAGEYLDELKLKELVKKYSEFINFPINLWASKEVEKEVPADEDESVDEEETSESTSSEEEGEEEDAEKAEDEKKPKTKTVKETTYEWELLNDMKAIWLRSPKEVTDEEYNKFYHSLAKDFSEDKPMAWSHFNAEGDVEFKAVLF…	1.04943	0.572579	0.725211	0.013987	2.27	0.430228	5.04	1.29077e-07	#N/A	#N/A	3.03143	2.65342e-14	3.4822	3.1547e-19	3.73213	7.55827e-09	2.14355	0.00108691
Solyc12g015880.2.1	Heat shock protein 90-1	HSP90-1	699	80.1	5.05	MAEAETFAFQAEINQLLSLIINTFYSNKEIFLRELISNSSDALDKIRFQSLTDKSKLDAQPELFIHIVPDKTNNTLTIIDSGVGMTKADLVNNLGTIARSGTKEFMEAIAAGADVSMIGQFGVGFYSAYLVAERVVVTTKHNDDEQYVWESQAGGSFTVTRDTSGENLGRGTKMTLFLKEDQLEYLEERRLKDLIKKHSEFISYPISLWVEKTIEKEISDDEDEEEKKDEEGKVEEVDEEKEKEEKKKKKIKEVSNEWSLVNKQKPIWMRKPEEITKEEYAAFYKSLTNDWEEHLAVKHFSVEGQLEFKAVLFIPKRAPFDLFDTKKKPNNIKLYVRRVFIMDNCEELIPEYLSFVKGIVDSEDLPLNISREMLQQNKILKVIRKNLVKKCIELFFEIA…	1.03959	0.350581	1.13404	0.00315661	1.23	1	6.66	1.0673e-20	#N/A	#N/A	#N/A	#N/A	#N/A	#N/A	2.46229	7.91448e-06	2.46229	0.000691263
Solyc06g076020.3.1	Heat shock protein 70 kD	Hsp70	648	71	5.16	MAGKGEGPAIGIDLGTTYSCVGVWQHDRVEIIANDQGNRTTPSYVGFTDTERLIGDAAKNQVAMNPINTVFDAKRLIGRRFSDASVQEDMKLWPFKVIPGPGDKPMIVVTYKGEEKEFAAEEISSMVLTKMKEIAEAFLGSTVKNAVVTVPAYFNDSQRQATKDAGVISGLNVMRIINEPTAAAIAYGLDKKATSAGEKNVLIFDLGGGTFDVSLLTIEEGIFEVKATAGDTHLGGEDFDNRMVNHFVQEFKRKHKKDITGNPRALRRLRTACERAKRTLSSTAQTTIEIDSLYEGVDFYSTITRARFEELNMDLFRKCMEPVEKCLRDAKMDKSTVHDVVLVGGSTRIPKVQQLLQDFFNGKELCKSINPDEAVAYGAAVQAAILSGEGNEKVQDLLL…	1.04197	0.180254	2.01534	4.68874e-05	5.53	0.653029	59.55	2.2099e-09	#N/A	#N/A	3.24901	1.81049e-06	6.49802	2.7042e-13	27.8576	7.93393e-27	42.2243	2.98502e-51
	Protein degradation										#N/A	#N/A	#N/A	#N/A	#N/A	#N/A	#N/A	#N/A	#N/A	#N/A	#N/A	#N/A	#N/A	#N/A
Solyc01g095200.3.1	Proteinase inhibitor 2	PI2	263	29.7	7.99	MAEHVENSDPKGESLLEKIADKFHGDDSSSSSESDTETKKPAVKSEVEPETETLKNKVWRLFGREKPVHKVFGGGKPADVFLWRNKKISATVIGGATAIWVLFELLEYHLLTLICHILIITLAVLFLWSNATTFINKKPPHIPEVHLPEGPILQVASALRIEINRALDLLREIASGRELKKFLAVIAGLWILSIVGSWCNFLTLFYISFVLLHTVPVIYEKYEDKVDPLAEKAMHEIKKQYAVFDEKVLSKIPRGPLKDKKKD	0.94305	0.710924	0.698337	0.0149672	#N/A	#N/A	#N/A	#N/A	#N/A	#N/A	#N/A	#N/A	#N/A	#N/A	#N/A	#N/A	#N/A	#N/A
Solyc02g092670.1.1	Subtilisin-like protease	SBT	754	79.9	6.34	MSTYTLLVVVLVCLCHMSVAMVEKKTYIIHMAKSQMPAIFDDHTHWYDASLKSVSESAEMIYVYKNVVHGFAARLTARQAESLETQPGILSVLPELIYQLHTTRTPLFLGLDRSVNIFPESDAMSDVIVGVLDTGVWPERKSFDDTGFGPVPDSWKGECESSNNFSSAMCNRKLVGARYFSRGYETTLGPIDESKESKSPRDDDGHGTHTASTAAGSVVQGASLFGYASGTARGMAYRARVAMYKVCWLGGCFNSDILAGMDKAIDDKVDVLSLSLGGSTPDYYKDSIAIGAFAAMEKGILVSCSAGNAGPNQFSLANQAPWITTVGAGTIDRDFPAYVSLGNGKNFSGVSLYAGDSLLNKMLPLVYAGNASNVTSGNLCMMGTLIPEKVKGKIVLCDR…	0.868816	0.00405504	1.00543	0.86353	#N/A	#N/A	#N/A	#N/A	#N/A	#N/A	#N/A	#N/A	#N/A	#N/A	#N/A	#N/A	#N/A	#N/A
Solyc10g080520.3.1	E3 ubiquitin-protein ligase CHFR	CHFR	410	45.6	6.35	MMQLLINHMTKINNRLKRASLKKNLEKLLRCHLNDGQESKPKQDSGESATVSPKCPFGYDGQESKPKQDSGESATVSPKCPFGYDGQKSKPKQDSGESATMSPKCPFGYDSQAFKLGPFSCMICQALLYESSRCVPCSHVFCKACLSRFKDCPLCGADIEKIEADMNLQNVVDRFIEGHARIKRSNNEQEDIVEKKTVIYEDASLERGAFLVQQAMRAFRANNIDSAKSRFTMCADDIREQLQRMGNTSELCSQLGAVLGMLGDCSRATGDAVSAVAYFEESVNFLLKVPKDDVEITHTLSVSLNKIGDLKYYAGDLQTARSHYFRALDVRRNAIKQQSVPSQVVDVAISLAKVADIDRNLGDEDTAVEGFQEGIKLLQSLELKPEEVSLEQRRQSVLE…	0.99778	0.959923	0.856962	0.0009479	#N/A	#N/A	#N/A	#N/A	#N/A	#N/A	#N/A	#N/A	#N/A	#N/A	#N/A	#N/A	#N/A	#N/A
Solyc01g111530.3.1	E3 ubiquitin-protein ligase UPL3	UPL3	1860	199.8	6.05	METRSRKRAEATSSAPSSSSSGPTTRAAKRARVTKVSTSTSTVNSTPVAPTASISTRSRITTRSQDSLASSTPMDSTNESSGSASRNRRGKNPSHGSDRDNLDKGKEKEHEVRVRDKERDRDAERILGLNIDSGGPGEDDDNDSEGGVGILHQNLNSASSALQGLLRKLGAGLDDLLPSSGVGSASSSHQSGRLKKILAGLRADGEEGKQVEALTQLCEMLSIGTEDSLSTFSVDSFVPVLVGLLNHENNPDIMLLAARALTHLVDVLPSSCAAVVHYGAVSCFVARLLTIEYMDLAEQSLQALKKISQEHPTACLRAGALMAVLSYLDFFSTGVQRVALATAANMCKKLPSDASDFVMEAVPLLTNLLQYHDAKVLEHASICLTRIAEAFASYPEKLD…	0.947335	0.321892	0.879255	0.00560532	#N/A	#N/A	#N/A	#N/A	#N/A	#N/A	#N/A	#N/A	#N/A	#N/A	#N/A	#N/A	2	0.00190159
Solyc02g082800.3.1	Ubiquitin domain-containing protein DSK2b	DSK2b	553	58.6	4.97	MGGGDTSAAAAKEDNENNATGDQKVIINVRCSNGSKFTVQVALDSSVGSFKSTLAQHSDIPAEQQRLIYKGRILKDEQTLTSYGLEADHTVHLVRGFAPAAAVNTASAVNTGNPNANQNAPSDAAPNVGGPFSGSGLGASLFPGLGSGGGLLGAGLPDFEQVQQQLTQNPNMMRDMLNMPLVQNLMNNPEIIRNMIMNNPQMREIMDRNPELAHVLNDPATLRQTMEAARNPELMREMMRNTDRAMSNIESSPEGFNMLRRMYENVQEPLLNATTMGGDARSDVGSNPFAALLGAQGTGQGRNQSTNPPTTGSEATANTPAPNTNPLPNPWASAGTGAGQTNTTARSNTAGETRAPPPAGLGGLALPDLEGMLGGMPDAASLNQMMQNPAVSQMMQSLL…	0.907331	0.00333921	0.878134	0.00530925	#N/A	#N/A	#N/A	#N/A	#N/A	#N/A	#N/A	#N/A	#N/A	#N/A	#N/A	#N/A	2	0.00745945
Solyc11g066250.2.1	Carboxypeptidase	CP1	499	56.3	5.22	MSSSSSLFPLLFVAIFLVLCSQIALSLSPNFFLQSHNDIISPKKLQLTMGEKLIRQLNLFPKHDINIVSSKDNNYENKLFEKKLDLSYLGDSGATVQDLGHHAGYFPLINTKSARMFYFFFESRSNKNDPVVIWLTGGPGCSSELALFYENGPFKISKNMSLVWNDFGWDKVSNLIYVDQPTGTGFSYTSDESDIRHNETGVSNDLYDFLQAFFNAHPEYVNNDFYITGESYAGHYIPAFASRVHQGNIKKEGIHINLKGFAIGNGLTNPEIQYKAYTDYSLDMKLINQTDYDYINQLYPTCQQEIKLCASGSEDACMKGFNDCNLIFNSIMDIAGDINYYDIRKTCNGSLCYDFSRMETYLNDDQVKEALGVPTSIDFVSCSSSVYQAMRMDWMKNLE…	0.969939	0.399152	0.858282	0.00118464	#N/A	#N/A	#N/A	#N/A	0.406126	0.000104697	0.307786	1.2055e-08	0.125	5.75035e-15	0.217638	2.66117e-09	0.466516	0.00247892
Solyc04g015340.3.1	Carboxypeptidase	CP2	456	52.1	6.11	MENSLCYVMFLSFLFVGSCYSFYNVEQENDRITYLPGQPENVQFSQYSGYVTVNQQAGRALFYWLIESPSTRNPEKRPLVLWLNGGPGCSSVAYGAAEEIGPFHINADGKTLYLNPYSWNNLANLLFLESPAGVGFSYTNTTSDLYDAGDQRTAEDTYQFVIKWFERFPQYKHREFYIAGESYAGHYVPQLSQLVYQRNKGIKNPIINFKGFMVGNAVTDDYHDYVGTFEYWWTHGLISDSTYKLLQITCDTGSSEHPSTDCTKALLLADHEQGNIDPYSIYTRPCASTNALHRNLRGHYPWMSRAYDPCTERYSDVYFNLPEVQKAFHANVTKIAYPWKTCSDIVGDYWDDSPLSMLPIYHELIAAGLRIWVFSGDTDSVVPLTATRYSIDALKLPTI…	0.933705	0.014368	0.887856	0.00135286	#N/A	#N/A	#N/A	#N/A	#N/A	#N/A	#N/A	#N/A	0.466516	4.23428e-09	0.466516	8.25423e-05	#N/A	#N/A
Solyc08g067100.2.1	Eukaryotic aspartyl protease family protein	ASP1	501	53.7	9	MKGLFVKYPNTIIVSPMATRSVLFSSSFLLILLSFSLEKSNALEGRKTIESNFHTIQLTSILPSSSCKPSSKGKRGGASLEVINKHGPCSQLNKKGEKGPTLTEMLAHDQARVDSIQTRIAAQNFNLFRKTEKTSKKYRAKDSKTTLPAQPGIALSTGNYIVTVGIGTPKKDLTLIFDTGSDLTWTQCEPCFKTCFPQQQPIFNPSSSSTYSNISCSSTACSGLKSATGNSPVCSSSTCVYGIQYGDSSFSIGFFAKDRLTLSATDVFDGFMFGCGQDNKGLFGKTAGLIGLGRDPLSIVSQTSAKFGKYFSYCLPTRRGSNGHLSFGKNGAKSNLQFTPFASSQGTSFYFIDVLGISVGGKSLAISPMVFKNAGTIIDSGTVITRLPSTAYSNLRATF…	0.896215	0.00172975	0.851648	0.000715266	#N/A	#N/A	#N/A	#N/A	#N/A	#N/A	#N/A	#N/A	#N/A	#N/A	#N/A	#N/A	#N/A	#N/A
Solyc01g096450.5.1	Eukaryotic aspartyl protease family protein	ASP2	373	40.1	9.28	MQNKDTNRLQFLASLVAGKSFVPIASGRQILQTPTYIVKAKIGTPPQPLLVALDNSNDFSWFPCGGCVGCSSNVFSYDKSTTFSNVSCERASCNLVPRRDCDAATCSFNLTYGGSSIGGTLSSETLALATDPVPGFLFGCVKKISGSNTPPQGLLALGRGLLSFISQSESLYKSTFSYCLPSYKSPNFSGTLRLGPKGQPLRIKTTPLLRNPRRSSFYYVNLVGVKVGKRIVDIPPSAFAFDSNTGAGTIIDSGTVFTRLVDQAYTAVRNEFRRRMGRNATVTSLGGFDTCYTVPITIPTITFMFAGMNVTLPQDNFLIKSSSSSTTCLAMAASPTDPVNSVLNVIASWQQQNHRILFDVPNSRVGVARETCS	0.944998	0.670139	0.870055	0.00612011	#N/A	#N/A	#N/A	#N/A	#N/A	#N/A	#N/A	#N/A	#N/A	#N/A	#N/A	#N/A	#N/A	#N/A
Solyc02g090090.3.1	Ethylene responsive proteinase inhibitor 1	ERI	472	50.2	4.46	MAEEAVISVTSPTAEQNQNSVNATIESGVQGGTESTCNNNNNNAESSAVTSDVNREKSLEYADELVVKGSKASEDGDYGEAVECFSRALEIRVAHFGELAPECINAYYKYGCALLYKAQDEADPLVSLPKKDSGSQQDSNRDGSVKSVVSCESSISSTAEPGGSSNGKEKVEDDAAEENEDEGDEEESDDEDLAEGDEDETDLDLAWKLLDVARAIAEKHAGDTMEKVDVLSALAEVALEREDIETSLSDYLKALSILERLVEPDSRHIAALNFRICLCLEIGSKHQEAIPYCQKAILTCKSRLQRLTEEIKLLSESTERLATTDVDQIARQSSSISQSDSVSAKEAEVETLTELSAELEKKLEDLQQCMSNPSSILSDILGMVSAKARSLENADASVA…	0.860834	0.260232	0.869552	0.0047203	#N/A	#N/A	#N/A	#N/A	#N/A	#N/A	#N/A	#N/A	#N/A	#N/A	#N/A	#N/A	#N/A	#N/A
Solyc05g012480.4.1	Mitochondrial processing peptidase	MPP	356	39.6	5.71	MIFKGTEKRPIRALEEEIENMGGHLNAYTSREQTTYFAKVLGSDVPKAVDILGDILQNSLLEEDKIIRERSVILREMEEVEKQPEEVIFDQLHTTAFQYTPLGRTILGPAQNIEKMTRAHIQDYISTHYGAHRMVISAAGAVKHEEVVELVKKHFTKLSSNPITTSQLVSEEPAIFTGSEIRIIDDDLPLAQFAVAFSGASWTDPDSIALMVMQQMLGSWSKSSGGGKHMGSELVQRVAINELAESVMAFNTNYKDTGLFGVYAEAKPDCLSDLAYVIMNGICKLSYKVSDADVVRARNQLKSSLMLHIDGSGPTAEDIGRQLITYGRRIPYAELFSRIDSVDAGTIKRVANRFIF	1.07649	0.290125	1.14695	0.0152818	#N/A	#N/A	#N/A	#N/A	#N/A	#N/A	#N/A	#N/A	#N/A	#N/A	#N/A	#N/A	#N/A	#N/A
Solyc06g084520.3.1	Cul1	Cul1	740	86	7.21	MTTSQMKTIELEEGWNFMQKGITKLKKILEGHPDSFSSEEYMMLYTTIYNMCTQKPPHDYSQQLYEKYKEAFEEYINSTVLSSLREKHDEFMLRELVKRWANHKLMVRWLSRFFHYLDRYFIARRSLPALNEVGLTCFRDLVYQELKSKARDAVIALIDQEREGEQIDRALLKNVLGIFVEIGMGEMEFYENDFEDAMLKDTSAYYSRKASNWIVEDSCPDYMLKAEECLKKEKDRVSHYLHSSSETKLLEKVQNELLVVYTNQLLEKEHSGCRALLRDDKVEDLSRMYRLFHRIPKGLEPVANMFKQHVTAEGMVLVQQAEDSASNKAESSSGSQEQVFVRKVIELHDKYMAYVTDSFANNSLFHKALKEAFEVFCNKIVAGCSSAELLASYCDNILK…	1.06382	0.161427	1.13123	0.0217719	#N/A	#N/A	#N/A	#N/A	#N/A	#N/A	#N/A	#N/A	#N/A	#N/A	#N/A	#N/A	#N/A	#N/A
Solyc08g079660.3.1	Clp protease-related protein, chloroplastic	ClpP	239	26.4	8.76	MAVQAISTVAATSKSINQLNCRGTDSFLWTKNPLELKNLQCKWLGTPIKFSLQSKNFKQFLSKQCTIRANVSFVLPRGKSEPTVPIEKIPKWSAKAVKSFTMAELEARKLKYDTTGTEALILGMLIEGTNFASKYLMANSITLLKFREEAIKILGKGDVFHCSPKEPPLTEDAQKALDWAFDEKLKSGNGGEITTTHVLLGVWAQQGSPGYKVLAALGFNDEKAKELENIITDPGFVDD	1.08246	0.0735181	1.18328	0.012855	#N/A	#N/A	#N/A	#N/A	#N/A	#N/A	#N/A	#N/A	0.378929	1.32348e-07	0.329877	1.41933e-14	0.233258	2.62008e-12
Solyc04g007120.4.1	Ubiquitin receptor RAD23c	RAD23c	409	42.6	4.81	MKIFVKTLKGSHFEIEVKPEDTVADVKKNIETVQGSDVYPAAQQMLIHQGKVLKDGTTLEENKVAESNFIVIMLTKSKSSAGEGSATSTAATAKTPQSSTAAPSSTPASTAAQVPVASPAAAPSPAPAPAAAPAPALAPAPASVPVPAPALAPASAVVSGSDVYGQAASSLVAGNNLDGAIQQILDMGGGTWDRETVVRALRAAFNNPERAVEYLYSGIPEAAEVPPVGGSPPSVQAGNQPAQPQPAAQPAPVPAGGPNADPLNLFPQGLPSVGSNTAGANTLDFLRNSQQFQALRAMVQANPQILQPMLQELGKQNPHLMRLIQEHQADFLRLINEPVEGGEGNNVLGQLAAAMPQAISVTPEEREAIERLEQMGFDHDLVLEVFFACNKNEELAANY…	1.04647	0.174019	1.10587	0.0356152	#N/A	#N/A	#N/A	#N/A	#N/A	#N/A	#N/A	#N/A	#N/A	#N/A	#N/A	#N/A	#N/A	#N/A
Solyc09g091750.3.1	26S proteasome non-ATPase regulatory subunit.1	PSMD1	1004	108.9	5.38	MVTATMVSSAGGLLAMLNESHPQLKLHALSNLNTFVDYFWPEISTSVPVIESLYEDEEFDQRQLAALVASKVFYHLGEHNVSLSYALGAGPLFDVAEDSDYVHTVLAKALDEYASYKIKAAESSDEATKVDPRLEAIVERMLDKCIKDGKYQQAIGMAIECRRLDKVAEAIVRSDNVDATLAYCSNVSHNFVNRREYRSEVLRLLVEVYEKSPSPNYLSMCQWLMFLDKPEDVASILEKLLRSENKDDALLAFQIAFDLVENEHQAFLLRVRDRLSSPNLQPSDTVQSLPADSDRAATEDDEASEDVPLLEESRPLGGTLTAADPKEVIYAERLGKLKGILSGETSIQLTLQFLYSHNKSDLLILKTIKQSVEMRNSVCHSATIYANAIMHAGTTVDTF…	1.01982	0.669701	1.12566	3.10759e-05	#N/A	#N/A	#N/A	#N/A	#N/A	#N/A	#N/A	#N/A	2	9.68961e-07	2	0.000485098	2.82843	2.85388e-06
Solyc03g117950.3.1	ATP-dependent Clp protease ATP-binding subunit-like protein chloroplastic	ClpB	964	105.6	7.42	MELSCSSPLSVNSTISFNRYVSVYPHRRCQSVLSLFPYYPSSSSHVATTATASAPCSTSSSSSTLFGISLSHRPSSSVHRKIKRSMYIVSGVFERFTERSIKAVMFSQKEAKALGKDMVSTQHLLLGLIAEDRSPGGFLGSRITIDKAREAVRSIWLGDSEDDTTKLGSQDSSSATSATDVAFSSSTKRVFEAAVEYSRTMGYNYIAPEHIAIGLFTVDDGSAGRVLKRLGANVNRLAAEAVSRLQGELAKDGRDPISFKRSREKSFPGKITIDRSAEKAKEKNALEQFCVDLTARASEGLIDPVIGRETEVQRMIEILCRRTKNNPILLGQAGVGKTAIAEGLAINIAEGNIPAFLMKKRVMSLDIGLLISGAKERGELEARVTTLIKEVKESGHIIL…	1.05757	0.387662	1.34884	0.00372291	1.13	1	4	0.00116279	#N/A	#N/A	#N/A	#N/A	2.2974	6.78071e-09	2.46229	1.18068e-10	4	3.60311e-10
Solyc08g077440.3.1	Lon protease homolog	LonP	877	97.1	6.96	MAESVELPSRLAILPFRNKVLLPGAIIRIRCTSPSSVKLVEQELWQREEKGLIGILPVRDSAESATSGTAVSSGMGGETSDSHKLDSKNQQEVIHWHDRGVAARALHLSRGVEKPSGRVTYIVVLEGLCRFNVQELSTRGTYYTARITSLDMTKGEMELIEQDQEFVALSRQFKATAMELISILEQKQKTGGRTKVLLETVPVHKLADIFVASFEISFEEQLSMLDSVDVKVRLSKATELVDRHLQSIRVAEKITQKVEGQLSKSQKEFLLRQQMKAIKEELGDNDDEEDDLVALERKMQGAGMPASIWKHALRELRRLKKMQPQQPGYNSSRVYLELLADLPWEKASPELELDLKAAKERLDADHYGLLKVKQRIIEYLAVRKLKPDARGPVLCFVGP…	1.03371	0.585745	1.27702	0.000211774	1.51	0.385945	5.76	3.94742e-18	#N/A	#N/A	#N/A	#N/A	#N/A	#N/A	#N/A	#N/A	2.2974	3.72055e-05
Solyc03g098730.1.1	Kunitz-type protease inhibitor	KPI	246	26.9	8.05	MALTPFLVAIILSTSFLFLVKAQNISEPVLDISGNPLVKGSQYFIVPVSGRSNEGGLDVSSIRNTVDTLVVTQNAQSSVGKSLRFTPVDANENIVRLSTDLNVKFMNIIFSDNMSTVWTINTRLIPQRNLVSVGGVEGNPGRDTLGNWFKIDKYEEAYKFVYCPGVCETCRPFCGDIGILVEPNNKRVLFVGSDKPLKVTFENTTSVVTVTKAPPTPSASHPDRLSTMSFINLVMCIVIAYLTKLM	1.0894	0.133981	1.47508	0.000543666	3.99	0.0398357	10.55	2.14948e-05	2	0.0492294	4	4.3926e-08	8.57419	3.17421e-17	39.3966	1.41015e-90	42.2243	1.46729e-77
	Carbohydrate & energy metabolism										#N/A	#N/A	#N/A	#N/A	#N/A	#N/A	#N/A	#N/A	#N/A	#N/A	#N/A	#N/A	#N/A	#N/A
Solyc06g082150.4.1	6-phosphofructo-2-kinase/fructose-2, 6-bisphosphatase	FKFBP	749	83.4	7.71	MGTGSSKNTDSSSHGSEDREDHGGGQLYVSLKMENYKLKGELIPHVFGSVPLIGSWDSSKALPMERESTSMWELSFVVPPNHETLDFKFLLKPKYNHEPYIVEEGPNRVLIAGTLQGDGRSASFMLEKEDIIEYRVFVKADRVSPFDLAASWRAFQENRRLSTVRGVPDVSINSTPAMGAEHGSSASLELDLEHYVVPAPATSAPVYAANLTETPRSLTRKGVFSGTDGTIIPRPSSKDGHTSNDRSASIKQMEVIVPDPTRVPSGSGTVESKSMGAFSSLQKQDSYRGILVDRGVGSPRLAKSPSTTTFTLDLKPDSDAKNVMPAAAGAVAAGAVADQMLGPKEDMHLAIVLVGLPARGKTFTAAKLTRYLRWLGHDTKHFNVGKYRRLKHGSNQTAD…	0.812176	0.0158262	0.677587	0.00277661	#N/A	#N/A	#N/A	#N/A	#N/A	#N/A	#N/A	#N/A	#N/A	#N/A	#N/A	#N/A	#N/A	#N/A
Solyc05g006520.5.1	Pyruvate dehydrogenase E1 component subunit alpha	PDHA1	391	43.2	7.5	MALSTSRAINHIMKPLSAAVCATRRLSSDSTATITVETSLPFTSHNVDPPSRSVETSPMELMTFFKDMTEMRRMEIAADSLYKAKLIRGFCHLYDGQEAVAVGMEAAITKKDCIITAYRDHCIFLGRGGTLVESFAELMGRRDGCSRGKGGSMHFYKKESGFYGGHGIVGAQVPLGIGLAFAQKYKKEDYVTFAMYGDGAANQGQLFEALNMAALWDLPAILVCENNHYGMGTAEWRAAKSPAYYKRGDYVPGLRVDGMDVFAVKQACAFAKQHALKNGPIILEMDTYRYHGHSMSDPGSTYRTRDEISGVRQERDPVERIRSLILAHNIATEAELKDIEKENRKVVDEAIAKAKESPMPDPSELFTNVYVKGFGVEAYGADRKELRATLP	1.11134	0.0476227	1.04454	0.122294	#N/A	#N/A	#N/A	#N/A	#N/A	#N/A	#N/A	#N/A	#N/A	#N/A	#N/A	#N/A	#N/A	#N/A
Solyc01g080460.3.1	Pyruvate, phosphate dikinase	PPDK	965	105.8	6.37	MSSTMKGLLLKPNTNNMYMTKLLKHKYAEEQFLAKYSSFGIHMNCSKWSSKVIRCHQQEPNGFSNSPVTPIRKQTPPPQAILSPVSETTSTAKKRVYTFGKGRSEGNKGMKSLLGGKGANLAEMASIGLSVPPGLTISTEACQEYQIAKKLPQGLWEEILQGLEVVEKDMGAFLGNPSKPLLLSVRSGAAISMPGMMDTVLNLGLNDEVVTGLAAKSGERFAYDSYRRFLDMFGDVVMGISHSLFAEKLEKLKDAKGVKLDTELTASDLKQLVEQYKNVYVEAKGEKFPSDPKRQLELAIKAVFDSWDSPRANKYRSINQITGLKGTAVNIQCMVFGNMGNTSGTGVLFTRNPSTGEKKLYGEFLINAQGEDVVAGIRTPQDLETMKECMPEAYKELVE…	1.22959	0.223741	1.1476	0.011298	#N/A	#N/A	#N/A	#N/A	0.5	0.000162208	0.406126	5.38588e-09	0.233258	1.03984e-16	0.133972	1.72632e-27	0.189465	5.71723e-13
Solyc01g098950.3.1	Glyceraldehyde-3-phosphate dehydrogenase	GAPDH	278	30.7	7.17	MLCEIHTVIFSSNNISRSVVFWGFKSMGIVYDDCCRHTWSCTYMFKYDSVHGQWKNNELKVKDEKTLLFDEKPVTVFGIRDPEEIPWAEAGAEYIVESTGVFIDKDKVAAHLKGGAKKVVISAPSKDAPMFVVGVNEKEYKPDLNIDSNASCTTNCLAPLAKVIHDRFGIVEGLMTTVHSITATQKTVDGPSAKDWRGGRDASFNIIPSSTGAAKAVGKVLPSLNGKLTGMSFRVPTVDVSVVDRTVRLEKEATYDEIKAAIMLNSFTFEHLRCHLLS	0.814032	0.0427124	0.721893	0.00933932	#N/A	#N/A	#N/A	#N/A	#N/A	#N/A	#N/A	#N/A	#N/A	#N/A	#N/A	#N/A	#N/A	#N/A
Solyc06g076780.3.1	Glycosyl hydrolase family protein	GH1	598	65.5	5.26	MDCIYKDPNAAIEERVKDLLSKMTVEEKIGQMTQIERAVANPSAIRDRCIGSVLSGGGSRPFENAESGDWANMIDGFQKGAVESRLGIPIFYGTDAIHGNNNVWGATIFPHNIGLGATRDADLVRRIGEVTALETRACGSQYAFAPCIAVAKDPRWGRFYESYSEDTEVVRKMTSLVSGLQGQPPEGHPYGYPYVSGRNSVMASAKHFVGDGATENGTNEGNTIASHDDMFNIHLAPYIDCIAQGVCTVMASYSSWNGDKMHSHRYLLTEVLKEKLGFKGLLITDWEALERLTDPHDADYRQSVKLTINAGIDMVMVPFRYELFLEQLLSLVESGEIPMTRIDDAVERILRVKFVAGLFEHPFTDRSLIDLVGCKAHRELAREAVRKSLVLLKNGKDPK…	0.927583	0.120464	0.822337	0.0123046	#N/A	#N/A	#N/A	#N/A	#N/A	#N/A	#N/A	#N/A	#N/A	#N/A	#N/A	#N/A	#N/A	#N/A
Solyc05g009470.4.1	Glycoside hydrolase family .1	GH2	554	62.5	7.39	MKFSFSFPFLLVLTICIIGCVKLVHTAPTKIGNGYSLIAIEESPDGGLIGYLKVKKKNKIYGPDIPNLQLYVKHETDNRLRIHITDADKQRWEVPYNLLPRESPPSLKQTIGKSRKGQLPLLSNQKYSGNELMFSYTSDPFSFSVKRKSNGQTIFNSSSEDSDPYSNLVFKDQYLEISTKLPKDASLYGLGENTQPHGIKIYPNDPYTLYTTDQSSINLNMDLYGSHPMYMDLRNVNGEAYAHAVLLMNSNGMDVFYRGDSLTYKVIGGVLDFYFFSGPTPLAVVDQYTEFIGRPAPMPYWSFGFHQCRWGYHNLSVIEDVIANYKKAKIPLDVIWNDDDHMDGKKDFTLHPVNYPGPKLRAFLKKIHAEGMHYIVINDPGIGVNKSYGTYQRGLANDV…	0.894587	0.240322	0.842039	0.0108205	#N/A	#N/A	#N/A	#N/A	#N/A	#N/A	#N/A	#N/A	#N/A	#N/A	#N/A	#N/A	#N/A	#N/A
Solyc03g121540.3.1	Beta-galactosidase 3	BGAL3	838	92.9	8.25	MGCTLILMLNVLLVLLGSWVFSGTASVSYDHRAIIVNGQRRILISGSVHYPRSTPEMWPGIIQKAKEGGVDVIQTYVFWNGHEPQQGKYYFEGRYDLVKFIKLVHQAGLYVHLRVGPYACAEWNFGGFPVWLKYVPGISFRTDNGPFKAAMQKFTAKIVNMMKAERLYETQGGPIILSQIENEYGPMEWELGAPGKSYAQWAAKMAVGLDTGVPWVMCKQDDAPDPIINACNGFYCDYFSPNKAYKPKIWTEAWTAWFTGFGNPVPYRPAEDLAFSVAKFIQKGGSFINYYMYHGGTNFGRTAGGPFIATSYDYDAPLDEYGLLRQPKWGHLKDLHRAIKLCEPALVSGDPAVTALGHQQEAHVFRSKAGSCAAFLANYDQHSFATVSFANRHYNLPPW…	0.915109	0.135318	0.899905	0.0493657	#N/A	#N/A	#N/A	#N/A	#N/A	#N/A	0.466516	0.0138291	#N/A	#N/A	0.164938	2.98609e-23	0.378929	5.04873e-05
Solyc01g104950.5.1	Beta-D-xylosidase 4	BXL4	778	85.2	8.16	MKKNRAMDEIKKHQHSVLLCFFFILSHFFLQFKPVSAQTSAVFACDTANNPSLKSFPFCDVSLGVSDRVNDLVKRLTLQEKISMLVNTAGSVSRLGIPKYEWWSEALHGISYTGPGVKFNNIVPHATSFPQPILTSASFNETLFQTIGKVVSTEGRAMYNVGQAGLTYWSPNVNIYRDPRWGRGQETAGEDPTLSSRYGVAYVKGLQQRDDGKKDMLKVASCCKHYTAYDVDDWKGIQRYNFNAKVTQQDLDDTFNPPFKSCVLDGNVASVMCSYNQVNGKPTCGDYDLLAGVIRGQWKLNGYIVTDCDSLNEMYWAQHYTKTPEETAALSLNAGLDLNCGSWLGKYTQGAVNQGLVNESVIDRAVTNNFATLMRLGFFDGNPKNQLYGNLGPKDICTE…	0.981732	0.74232	0.854803	0.0269196	#N/A	#N/A	#N/A	#N/A	#N/A	#N/A	#N/A	#N/A	#N/A	#N/A	#N/A	#N/A	#N/A	#N/A
Solyc10g081120.3.1	Alpha-L-arabinofuranosidase	Afase	674	74.2	5.53	MESRHSIHHVLLLVLFGLSALCQCSATGVEANQTAVLLVNASEASARRIPDTLFGIFFEEINHAGAGGLWAELVNNRGFEGGGPNVPSNIDPWSIIGDESKVIVSTDRSSCFDRNKIAVQVQVLCDHTGANICPDGGVGIYNPGFWGMNIEQGKSYKLVLYVRSEESVNVSVALTGSNGLQKLAAANIVAADVSSWTKVEILLEATGTDPNSRLELRSSKKGVIWFDQVSLMPTDTYKGHGFRKDLFGMLKDLKPAFIRFPGGCFVEGDWLRNAFRWKETIGQWEERPGHFGDVWNYWTDDGLGHFEFLQLAEDLDSLPVWVFNNGVSHHDQVDTSSILPFVQEILDGLEFARGDPTSTWGSIRAKMGHPEPFDLRYVAIGNEDCGKTQYRGNYLKFYT…	0.907784	0.00241412	0.922788	0.000924755	#N/A	#N/A	#N/A	#N/A	#N/A	#N/A	#N/A	#N/A	#N/A	#N/A	#N/A	#N/A	#N/A	#N/A
Solyc06g007980.4.1	Sterol 3-beta-glucosyltransferase	SGT	543	58.8	5.73	MDQTSPEVSMAEPSTKFNKRSSSSSSGELSVTVVKEDDISTAGAGADVGSREEAVGGSASNGVTNSSGTSGMELTRVSTLPSENPQSPSDQPKLGRSKTEKPTHSSGFAQEAAKIFDDKISEQQKLKLLKRIATVKDDGTVEFEIPGDVETTEVLGTGSESVHTAVEDEPLDATELQYFPPMQIVVLIVGTRGDVQPFTAIGKRLQDFGHRVRLATHANFKEFVLSAGLEFYPLGGDPKVLAGYMVKNKGFLPSGPSEIPVQRNQMKEIIYSLLPACKEPDMDTGVPFKADAIIANPPAYGHVHVAEALQIPIHIFFTMPWTPTSEFPHPLSRVKQPAGYRLSYQIVDSLIWLGIRDMINDLRKKKLKLRPVTYLSGSQSSELDIPHAYIWSPHLVPKP…	0.908946	0.00836744	0.961477	0.0932159	#N/A	#N/A	#N/A	#N/A	#N/A	#N/A	#N/A	#N/A	#N/A	#N/A	#N/A	#N/A	#N/A	#N/A
Solyc01g067890.4.1	1-D-deoxyxylulose 5-phosphate synthase	DXS	719	77.6	6.8	MALCAYAFPGILNRTGVVSDSSKATPLFSGWIHGTDLQFLFQHKLTHEVKKRSRVVQASLSESGEYYTQRPPTPILDTVNYPIHMKNLSLKELKQLADELRSDTIFNVSKTGGHLGSSLGVVELTVALHYVFNAPQDRILWDVGHQSYPHKILTGRRDKMSTLRQTDGLAGFTKRSESEYDCFGTGHSSTTISAGLGMAVGRDLKGRNNNVIAVIGDGAMTAGQAYEAMNNAGYLDSDMIVILNDNRQVSLPTATLDGPVAPVGALSSALSRLQSNRPLRELREVAKGVTKQIGGPMHELAAKVDEYARGMISGSGSTLFEELGLYYIGPVDGHNIDDLIAILKEVRSTKTTGPVLIHVVTEKGRGYPYAERAADKYHGVAKFDPATGKQFKASAKTQS…	0.994849	0.840041	0.906954	0.00728591	#N/A	#N/A	#N/A	#N/A	#N/A	#N/A	#N/A	#N/A	#N/A	#N/A	#N/A	#N/A	#N/A	#N/A
Solyc09g031970.3.1	Alpha-1,4 glucan phosphorylase	GP	837	94.9	6.67	MEGEGEGAKSNDVSAAVISEPLTDIASNIKYHAQYTPHFSPFNFEPLQAYYAATADSVRDRLIKQWNDTYLHYHKLNPKQTYYLSMEYLQGRALTNAIGNLDIHNAYAHALNKLGQDLEEVVDQEKDAALGNGGLGRLASCFLDSMATLNLPAWGYGLRYRYGLFKQLITKAGQEEVPEDWLEKFSPWEIVRHDVVFPIRFFGHVEVLPSGSRKWVGGEVVQALAYDVPIPGYKTKNTNSLRLWEAKASSEDFNLFLFNDGQYDAAAQLHSRAQQICAVLYPGDATENGKLLRLKQQFFLCSASLQDIIARFKEREDGKGAHQWSEFPKKVAIQLNDTHPTLTIPELMRLLMDDEGLGWGESWNITTKTIAYTNHTVLPEALEKWSQAVMWKLLPRHME…	1.1303	0.0064701	0.989576	0.775969	#N/A	#N/A	#N/A	#N/A	#N/A	#N/A	0.5	0.000691772	0.329877	2.79998e-07	0.143587	5.35048e-46	0.233258	7.89597e-12
Solyc04g074380.4.1	Glycosyltransferase	GTase1	482	54.1	5.62	MGSIGNHNKPHAVCIPYPAQGHINPMLKLAKILNYKGFHITFVNNEYNHRRLLKSRGPDSLKGLPSFQFETIPDGLPPCDADSTQDIPALCESTTKTCLGPFKELLAKLNDTCSSNVPPVSCIISDGCMSFTLAAAQELGIPEVFFWTPSACGFLGYMHYHELAKKGYFPLKDASDLTNGYLETALDWIPGMKDIRLRDLPSFLRSTNPDDFLFNYLIQETNRSKSVSAIVVNTFDPLEKEVLESLQTLLPPVYAIGPLHFLVKHIEDKNLERLGSNLWKEDPKSVEWLDSKKPNSVVYVNFGSITVMTANQLIEFAWGLANSEMEFLWIIRPDIVSGEEAILPPEFVEETKERGMLTSWCPQEQVLSHPAIGGFLTHSGWNSTLESIGNGVPMICWPF…	1.06441	0.017758	1.15587	0.00367785	#N/A	#N/A	#N/A	#N/A	#N/A	#N/A	#N/A	#N/A	#N/A	#N/A	#N/A	#N/A	#N/A	#N/A
Solyc01g095620.3.1	Glycosyltransferase	GTase2	476	52.5	5.99	MAQIPHIAILPSPGMGHLIPLVEFAKRIFLHHHFSVSLILPTDGPISNAQKIFLNSLPSSMDYHLLPPVNFDDLPEDVKIETRISLTVSRSLTSLRQVLESIIESKKTVALVVDLFGTDAFDVAIDLKISPYIFFPSTAMGLSLFLHLPNLDETVSCEYRDLPDPIQIPGCTPIHGKDLLDPVQDRNDESYKWLLHHAKRYGMAEGIIVNSFKELEGGAIGALQKDEPGKPTVYPVGPLIQMDSGSKVDGSECMTWLDEQPRGSVLYISYGSGGTLSHEQLIEVAAGLEMSEQRFLWVVRCPNDKIANATFFNVQDSTNPLEFLPKGFLERTKGFGLVLPNWAPQARILSHESTGGFLTHCGWNSTLESVVHGVPLIAWPLYAEQKMNAVMLSEDIKVA…	1.04867	0.0159825	1.26032	0.000233021	1.25	0.857628	4.22	0.000658683	#N/A	#N/A	#N/A	#N/A	#N/A	#N/A	#N/A	#N/A	#N/A	#N/A
Solyc10g085920.3.1	UDP-glucuronic acid decarboxylase.1	UXS1	416	46.3	8.65	MSISQNTPPSSPKTLKHPRSLPRSINYILKEQRLLFILVGILIGSTFFILQPSLSLLNPSSPIPKSYHGFDSVPAGIHHTSTVTTPYRIAGSVTGRVPVGIGRKRTRVVVTGGAGFVGSHLVDKLIKRGDDVIVIDNFFTGRKENVMHHFGNHRFELIRHDVVEPILLEVDQIYHLACPASPVHYKYNPTNVMGTLNMLGLAKRIGAKFLLTSTSEVYGDPLEHPQKETYWGNVNPIGVRSCYDEGKRTAETLTMDYHRGADVEVRIARIFNTYGPRMCLDDGRVVSNFVAQAIRKQPMTVYGDGKQTRSFQYVSDLVDGLMALMDGDHIGPFNLGNPGEFTMLELAEVVKEVIDPSATIEFKANTADDPHKRKPDISKAKELLNWEPKIPLRDGLPLM…	1.22326	0.0323382	1.03864	0.507285	#N/A	#N/A	#N/A	#N/A	#N/A	#N/A	#N/A	#N/A	#N/A	#N/A	#N/A	#N/A	#N/A	#N/A
Solyc09g075120.3.1	UDP-glucuronic acid decarboxylase 4	UXS4	440	49.3	8.92	MTSELIYRGPESVPVTDGYTPKPHKPWFTVIRPLRYLLREQRIVFLFAGIAIASLIFAFLPSSRSSGGSSYANTGIYDSYLPSESTESQVAHRMIYHNRVGFGSINSGGKIPLGLKRKVLRIVVTGGAGFVGSHLVDRLIARGDSVIVVDNFFTGRKENVMHHFGNPRFELIRHDVVEPLLLEVDQIYHLACPASPVHYKHNPVKTIKTNVVGTLNMLGLAKRVGARFLLTSTSEVYGDPLEHPQKETYWGNVNPIGVRSCYDEGKRTAETLTMDYHRGAEVEVRIARIFNTYGPRMCIDDGRVVSNFVAQALRKEPLTVYGDGKQTRSFQFVSDLVEGLMRLMEGEHVGPFNLGNPGEFTMLELAKVVQETIDPNAQIVHKPNTEDDPHKRKPDISKA…	1.09184	0.141086	1.46002	0.00341618	2.35	0.00148697	10.12	7.21783e-13	2.46229	9.76938e-08	2.63902	2.45408e-11	4	3.00597e-22	8	1.83519e-60	9.18959	2.17497e-40
Solyc04g005160.3.1	6-phosphogluconate dehydrogenase, decarboxylating	PGD	471	52.1	5.38	MGQNLALNIAEKGFPISVYNRSTSKVDETVERAKKEGNLPLYGFHDPESFVLSIQKPRVIIILVKAGLPVDQTIKTLSAFMEKGDCIIDGGNEWYENTERREKEMAELGLLYLGMGVSGGEEGARNGPSMMPGGSFEAYKYIEDILLKVAAQVPDSGPCVTYIGEGGSGNFVKMVHNGIEYGDMQLIAEAYDVLRSVGKLSNDELHQVFSEWNKGELLSFLIEITADIFGVKDDKADGYLVDKVLDKTGMKGTGKWTVQQAAELSVAAPTIAASLDSRFLSGLKDERVEAAKVFESSGVSDIFVEQSVDKNQLIDDVRKALYASKICSYAQGMNLIRAKSVEKGWDLKLGELARIWKGGCIIRAIFLDRIKGAYDRNPDLANLLVDEEFAKEMVERQSA…	1.55829	0.000759716	2.43404	3.8538e-05	8.69	0.0547508	26.31	1.53849e-05	#N/A	#N/A	#N/A	#N/A	#N/A	#N/A	#N/A	#N/A	#N/A	#N/A
Solyc06g081980.1.1	Pyridoxal 5'-phosphate synthase pdxS subunit	pdxS	309	33.1	6.32	MAGSGVVTVYGNGALTETTKQSPFSVKVGLAQMLRGGVIMDVVNAEQARIAEEAGACAVMALERVPADIRAQGGVARMSDPQLIKEIKQAVTIPVMAKARIGHFVEAQILEAIGIDYVDESEVLTLADDENHINKHNFRIPFVCGCRNLGEALRRIREGAAMIRTKGEAGTGNIIEAVRHVRSVMGDIRVLRNMDDDEVFTFAKKIQAPYDLVMQTKQLGRLPVVHFAAGGVATPADAALMMQLGCDGVFVGSGIFKSGDPAKRGRAIVQAVTHYSDPQLLAEISCGLGEAMVGINLDEKVERYANRSE	1.01483	0.820932	1.2008	0.0390184	#N/A	#N/A	#N/A	#N/A	#N/A	#N/A	#N/A	#N/A	#N/A	#N/A	0.287175	2.46032e-11	0.435275	6.19314e-05
	Cell wall organization										#N/A	#N/A	#N/A	#N/A	#N/A	#N/A	#N/A	#N/A	#N/A	#N/A	#N/A	#N/A	#N/A	#N/A
Solyc10g086180.2.1	Phenylalanine ammonia-lyase	PAL1	711	77.4	6.24	MAGVINGQQDLDFCIKVDPLNWEMAAESLRGSHLDEVKKMVAEFRKPVVKLGGETLTVAQVASVAAKVNVENVKVELCEDARAGVKASSDWVMESMSKGTDSYGVTTGFGATSHRRTKNGGALQKELIRFLNAGVFGNGTESCHTLPQSSTRAAMLVRINTLLQGYSGIRFEILEAITKLINHNVTPCLPLRGTITASGDLVPLSYIAGLLTGRPNSKAVGPNGETLNAEEAFHVAGVNGGFFELQPKEGLALVNGTAVGSGLASIVLFDANVLAVFSEVLSAIFAEVMNGKPEFTDHLTHKLKHHPGQIEAAAIMEHILDGSAYVKAAQKLHEMDPLQKPKQDRYALRTSPQWLGPQIEVIRSATKMIEREINSVNDNPLIDVSRNKALHGGNFQGTP…	1.09985	0.131809	1.37387	0.00258836	#N/A	#N/A	#N/A	#N/A	2.63902	7.90109e-10	#N/A	#N/A	#N/A	#N/A	2	3.28733e-07	3.4822	9.85753e-06
Solyc09g007900.5.1	Phenylalanine ammonia-lyase	PAL2	721	78.3	6.74	MASSIVQNGHVNGEAMDLCKKSINVNDPLNWEMAAESLRGSHLDEVKKMVDEFRKPIVKLGGETLTVAQVASIANVDNKSNGVKVELSESARAGVKASSDWVMDSMGKGTDSYGVTTGFGATSHRRTKNGGALQKELIRFLNAGVFGNGTESSHTLPHSATRAAMLVRINTLLQGYSGIRFEILEAITKLINSNITPCLPLRGTITASGDLVPLSYIAGLLTGRPNSKAVGPNGEKLNAEEAFRVAGVTSGFFELQPKEGLALVNGTAVGSGMASMVLFESNILAVMSEVLSAIFAEVMNGKPEFTDYLTHKLKHHPGQIEAAAIMEHILDGSSYVKAAQKLHEMDPLQKPKQDRYALRTSPQWLGPQIEVIRAATKMIEREINSVNDNPLIDVSRNKA…	1.26606	0.00890369	2.64868	0.000149385	3.02	0.000107572	2.52	0.00425637	#N/A	#N/A	#N/A	#N/A	#N/A	#N/A	#N/A	#N/A	#N/A	#N/A
Solyc05g055730.4.1	Methylenetetrahydrofolate reductase	MTHFR	596	67.6	5.82	MKVIEKIQESVKDDRVVFSFEFFPPKTEDGVDNLFERMERMVSHNPSFCDITWGAGGSTADLTLEISNRMQNMVCVETMMHLTCTNMPVEKIDHALETIKSNGIQNVLALRGDPPHGQDKFVQVEGGFACALDLVKHMRAKYGDYFGITVAGYPEAHPDVIPANGLATLETYENELAYLKQKVDAGADLVVTQLFYDTDNFLKFVSDCRQIGITCPIVPGIMPINNYKGFLRMTGFCKTRIPAEITAALEPIKDNEEAVKAYGIHLGTEMCKKIMASGIKTLHLYTLNMEKSALAILMNLGLIEESKISRLLPWRRPTNVFRIKEDVRPIFWANRPKSYISRTIGWDEFPHGRWGNAKNPSYGALSDYQFMRARSRDKKLQEEWAIALNSVEDIYERFM…	1.02577	0.591972	1.14388	0.0305064	#N/A	#N/A	#N/A	#N/A	#N/A	#N/A	#N/A	#N/A	#N/A	#N/A	#N/A	#N/A	#N/A	#N/A
Solyc08g082170.4.1	Pectin lyase-like superfamily protein	PLL	467	50.9	8.13	MNRWVGSIFLCIISTLLLTSWLVAAEGETCSGIVPMQYRNDKISILDFGGVGDGRTLNTKAFKEAIFRIQHLKRKGGTLLYIPAGVYLTGPFDLTSRMTLYLARGAVIKATQDPSQWPLVDPLPSYGRGRERPGARYMSLLHGDGLHDVIITGENGTIDGQGDVWWNMWRQRTLQFTRPHLVELMNSRGILISNVIFKNSPFWNIHPVYCSNVVIRYVTILAPADSPNTDGIDPDSSSNVCIEDSYISVGDDLVAVKSGWDQYGIAYGRPSHGITIRRITGSSPFAGIAVGSETSGGVVDVLAEHISLFNMGVGIHIKTNVGRGGMIRNITVSNVYMENARTGIKIAGDVGDHPDENFNPNALPVVKGIKIKDVWGEKVLQAGLIHGLKNSPFSGICLS…	0.942956	0.103226	0.809014	0.00183809	#N/A	#N/A	#N/A	#N/A	#N/A	#N/A	#N/A	#N/A	#N/A	#N/A	#N/A	#N/A	#N/A	#N/A
Solyc08g005800.4.1	Pectin acetylesterase	PAE	392	43.2	8.9	MVKGTMQLLLRAIFTLLIVLISEGHPVEITYLQSAVAKGAVCLDGSPPAYHFDKGFGAGVNNWFIQLEGGAWCNNATTCLERTKTRLGSSKLMVKTVSFSGILSNKAKFNPDFYNWNRIRIRYCDGSSFTGDVAAADPRTKVFYRGARIFSAVMDDFLAKGMKNAQNAILAGCSAGSLAAILHCDRFKGLLPSGAKVKCLSDAGFFINTQTISGTSHIEKFYSEVVNTHGSAKNLPQSCTSRLKPGLCFFPQNVAQQIQTPLFLVNAAYDSWQIKNILAPGVADPHGTWRNCKLDILKCSSAQLQTMQAFRSEFLKALNSLGPSSTRGYYINSCYAHCQTGTQETWLRDDSPVLSGTTIAKAVGDWYYERKRFQEIDCPYPCNKTCKNRNFE	0.907592	0.34268	0.825762	0.00306224	#N/A	#N/A	#N/A	#N/A	#N/A	#N/A	#N/A	#N/A	#N/A	#N/A	#N/A	#N/A	#N/A	#N/A
Solyc04g082140.3.1	Pectin esterase	PE	540	60	9.07	MLPLKFAVAVFLVVLIGNSVVAEDPYRYFDWNVTYGTIYPLGVPQQGILINGQFPGPDINSVTNDNLVINIHNSLDEPFLLSWNGVQNRRNSFVDGVYGTTCPIPPGRNNTFNLQVKDQIGSFYYFPSLAFHKAAGGFGGIRILSRPRIPVPFPDPANDYTILIGDWYKKNHTDLKAILDGGRKLPFPDGILINGRGPNGVTFTVDQGKTYRLRISNVGLQNSLNFRVEGHKMTLVEVEGTHTLQTTYSSLDVHAGQSYSVLITANQEAKDHYIVVSSRFTTPVLTTTAVLHYSSSNTPVSGPPPGGPTIQIDWSLNQARSIRTNLSASGPRPNPQGSYHYGMINTTKTIRLASSAGQVNGKQRYAVNSVSFVPLDTPLKLLDYFKIGGFRVGSIPDSP…	0.994195	0.927168	0.869397	0.0403962	#N/A	#N/A	#N/A	#N/A	#N/A	#N/A	#N/A	#N/A	#N/A	#N/A	#N/A	#N/A	#N/A	#N/A
Solyc04g081870.5.1	Expansin	EXP	257	27.7	8.92	MAKIGILTLGFIFVFCNILVSTANAFSASGWMSAHATFYGGSDASGTMGGACGYGNLYSTGYGTNTAALSTALFNDGASCGQCYKIMCDYNQDSKWCIKGTSITITATNFCPPNFALPSNNGGWCNPPRPHFDMAQPAWEKIGIYRGGIVPVMYQRIPCVKKGGVRFTINGRDYFELLMISNVGGAGSIQSVQIKGSRTNWMTMARNWGANWQSNAFLNGQSLSFKVTTSDGVTKTFLNVASSNWRFGQTYSSSINF	1.0205	0.809617	0.879922	0.0146567	#N/A	#N/A	#N/A	#N/A	#N/A	#N/A	#N/A	#N/A	#N/A	#N/A	#N/A	#N/A	#N/A	#N/A
Solyc03g065250.4.1	Fatty acid hydroxylase superfamily	FAH	626	72.8	8.37	MASKPGILTEWPWTWLGNFKYVVLAPFVGRSIESLLNREDGSKIDIGYLIIFPFLLFRMLHNQIWISLSRYKTAKGDNRILDKTIEFDQVDRERNWDDQILLNGLLFYYGYMKLEQSHYLPIWRSDGIILTTLLHIGPVEFLYYWLHRALHHHFLYSRYHSHHHSSIVTEPITSVIHPFAEHIAYFLLFSIPLLTTVVTKTASIVSFGGYITYIDFMNNMGHCNFEIIPKWMFSTFPPLKYLMYTPSYHSLHHTQFRTNYSLFMPIYDYIYGTLDKSSDTLYEKSLERQGKSPDVVHLTHLTTPESIYHLRLGFASFASQPYTSKWYFWLMWPVTLWSMMVTWIYGHTFTVERNVFNNLNLQTWAIPKYRVQYFMQWQRETINNLIEEAIMEADQKGIK…	0.971355	0.316418	0.89057	0.00322483	#N/A	#N/A	#N/A	#N/A	#N/A	#N/A	#N/A	#N/A	#N/A	#N/A	#N/A	#N/A	#N/A	#N/A
Solyc11g008630.3.1	HXXXD-type acyl-transferase family protein	H-AT	372	41.9	5.19	MNQESKRLEFDCNSDAGAVFMVASSELTLNEIGDLVYPNPGFRQLIVHENIDILEKDDKPLCILQVTSFKCGGFAMGFSTNHITFDGISFKTFLQNLASQAFDDDNNNPKPLAIVPCNDRTLLAARRPPRVTFPHVELLKLDVPIGEELNAKVFETLQEELDFKIFKFNPSDINSLKEKAKDENTPNAKITSFNVVTSYVWRCKALSYDDENNSERVSTVLFAVDIRPRLNPPLPQSYAGNAVLTSYASATCHELEEGPFSKIVDLVSQGGKRMDDEYARSAIDWGEINKGFPNGEFLLSSWWKLGFSQVEYPWGKPKYSCPVVCHRKEIILLFPNIDDGKSNNNDGVNIFVALPPKQMNKFESYFNKFLLD	0.917056	0.0208652	0.872778	0.0286106	#N/A	#N/A	#N/A	#N/A	#N/A	#N/A	#N/A	#N/A	#N/A	#N/A	#N/A	#N/A	#N/A	#N/A
Solyc09g092270.3.1	Transferase	Transferase	427	47.7	5.91	MVSSKLEDGLIYNIKLSSVGPARVTGQDVVYEPSNMDLAMKLHYLRGIYYFDSQAFQGVTIYKIKEPIFIWFNYFYMTNGRFRRAESGRPYIKCNDCGARFIEAQCDKTLDEWLEMKDTSLEKLLVSNQVLGPELAFSPPVLIQHTKFKCGGISLGLSWAHVLGDIFSATEFWNFLGKVVGGYQPPRPINLAHSLTKANSTETLQKIVEDPLSIKRVDPVEDHWVANASYKLESFSIHVSASKLGQLQSRIGIQGPFESLCSIIWQSISRIRDGPGPKVVTICKKGEEKKEGGLIGNTQLIGVVKVDDSIRDANPSELARLIKNEIIDERLKIDEAIEKEHGVSDVIVYGANLTFVSLEGVDLYEFDWKGHKPKNVSYFIDGVGDAGTVLVLPDGPNYA…	0.950313	0.234244	0.893437	0.0480713	#N/A	#N/A	#N/A	#N/A	#N/A	#N/A	#N/A	#N/A	#N/A	#N/A	0.0473661	1.9342e-25	0.0544094	1.58666e-16
	Energy										#N/A	#N/A	#N/A	#N/A	#N/A	#N/A	#N/A	#N/A	#N/A	#N/A	#N/A	#N/A	#N/A	#N/A
Solyc01g091880.3.1	ATPase	ATPase	360	40.4	4.88	MASNNQDLPEATVQNVLEQDTLKWVFVGGKGGVGKTTCSSILGILLSQFRSSVLIISTDPAHNLSDAFQQRFTKSPTLVNGFSNLYAMEIDPTVEKEDSISSDGMDDFLSDLANAIPGIDEAMSFAEMLKLVQTMDYSVIVFDTAPTGHTLRLLQFPSTLEKGLAKVMSLKSRFGGMLSQMTRLLGVDEEFGEAALLGKLEGMKDIIEEVNRQFKDPDLTTFVCVCIPEFLSLYETERLVQELAKFEIDTHNIIINQVIFDEEVVESKLLKARMRMQQKYLDQFYMLYDDFNITKLPLLPQEVCGVEALKEFSHHFVTPYQPSLARGSVEELQNRVAALKLLLKDAEAELERVQKGKQKI	1.01338	0.688019	1.12108	0.0119265	1.19	1	2.09	0.00373817	#N/A	#N/A	#N/A	#N/A	#N/A	#N/A	#N/A	#N/A	#N/A	#N/A
Solyc01g110390.2.1	NADH dehydrogenase [ubiquinone].1	NDU1	119	13.9	7.52	MSGIASVSFLARRASQRERVRILYRRALRDTLNWAVHRHLFYPDADALRERFEVNRKVEDVETIDRLIADGEASYNKWRHPDPYIVPWAPGGSKFNRNPVPPEGIEIVYDYGKEEAELV	0.927719	0.00395542	0.90868	0.0111638	#N/A	#N/A	#N/A	#N/A	#N/A	#N/A	#N/A	#N/A	#N/A	#N/A	#N/A	#N/A	#N/A	#N/A
Solyc02g087240.4.1	NADH dehydrogenase [ubiquinone] flavoprotein 1, mitochondrial	NDUFV1	487	53.6	8.03	MAPIKGLLSLQRTALAQRSSERWGQYGRLFSTQAASTASTPQPTPPPPPPERTHFGGLKDEDRIFTNLYGLHDPYLKGAMKRGDWYRTKDLVIKGSDWIVNEMKKSGLRGRGGAGFPSGLKWSFMPKTTDGRPSYLVVNADESEPGTCKDREIMRHDPHKLLEGCLIAGVGMRARAAYIYIRGEYVNERLSLQKARQEAYEAGLLGKNACGSGYDFDVYIHFGAGAYICGEETALLESLEGKQGKPRLKPPFPANAGLYGCPTTVTNVETVAVSPTILRRGPEWFASFGRKNNAGTKLFCISGHVNKPCTVEEEMSISLKELLERHCGGVRGGWDNLLAVIPGGSSVPLLPKNICEDVLMDFDALKAVQSGLGTAAVIVMDKSTDVVDAIARLSYFYKH…	1.04001	0.292341	1.17006	0.0085114	#N/A	#N/A	#N/A	#N/A	#N/A	#N/A	#N/A	#N/A	#N/A	#N/A	#N/A	#N/A	#N/A	#N/A
Solyc08g068400.4.1	Alpha/beta-Hydrolases superfamily protein	ABH#	359	40.2	5.33	MATVETNDAASELRSQFLQVLRSRRPSEVPLSVIPGKPVKDPFFQESPKPTFSEAMASCPKEDIPNSNELLQEENFYLTTEEGGQGILPVLVLSMKESEKKRRPTIVFLHSTNKCKEWLRPLLEGYASRGYIAVAIDSRYHGERATSITTYRESLVSSWKNGDTMPFIFDSVWDLIKLVDYLTEREDVDPSKIGITGESLGGMHAWFAAFVDTRYSVVVPIIGVQGFGWAIEHDKWQARVNSIKAIFEEASADLDKSAIDKEVVQKVWDRIAPGLASQFDAPYTVPTIAPRPLLILNGADDPRCPLGGLEIPESRTLEAYEKANCTQNFKLIAQPGIGHQMTPLMVKEASDWFDRFLKV	1.10248	0.0178795	1.03498	0.249037	#N/A	#N/A	#N/A	#N/A	#N/A	#N/A	#N/A	#N/A	#N/A	#N/A	#N/A	#N/A	#N/A	#N/A
Solyc01g073740.4.1	Citrate synthase	CS	474	53	8.24	MVFYRSVSLLSKLRSRAVQQSNVSNSVRWLQVQTSSGLDLRSELQELIPEQQDRLKKIKSEYGKVQLGNITVDMVLGGMRGMTGLLWETSLLDPDEGIRFRGLSIPECQKVLPAAKPGGEPLPEGLLWLLLTGKVSAIKRASEFIVSGIAESGYYPWYVNHVYKTIDALPVTAHPMTQFATGVMALQVQSEFQKAYEKGIHKSKFWEPTYEDSMNLIAQVPLVAAYVYRRMYKNGDTIPKDESLDYGANFAHMLGFSSSEMHELMRLYVTIHSDHEGGNVSAHTGHLVASALSDPYLSFAAALNGLAGPLHGLANQEVLLWIKSVVEECGENISKEQLKDYVWKTLNSGKVVPGFGHGVLRKTDPRYTCQREFAMKHLPKDPLFQLVSKLYEVVPPVLT…	1.10681	0.0062353	1.06671	0.0506048	2.19	0.0010564	2.72	6.2286e-06	#N/A	#N/A	#N/A	#N/A	#N/A	#N/A	#N/A	#N/A	#N/A	#N/A
Solyc02g078940.3.1	Oxidoreductase, zinc-binding dehydrogenase family protein ZBD#	ZBD#	325	34.6	7.21	MKAVVITSPGGPEVLKLQEVEDPQIKDDEILIKIAATALNRADTLQRQGKYPPPKGDSEYPGLECSGTVEAVGKEVTRWKIGDQVCALIGGGGYAEKVAVPTGQVLPIPSGVSLQDAASFPEVVCTVWSTIFMTSKLSSGETFLIHGGSSGIGTFAIQMAKCLGVKVFITAGSEEKLSACKELGADVCINYKTEDFVTRIKEETGGKGVDVILDNIGGSYFQRNLDSLNVDGRLFIIGFMGGTVTQVNLGCLLARRLTVQAAGLRSRSPKNKAQIVREVEKNVWPAIAAGKVKPVVYKYFPLAEAAEAHQLMESSNHIGKILLTV	0.90668	0.00753942	1.00098	0.974584	#N/A	#N/A	#N/A	#N/A	#N/A	#N/A	#N/A	#N/A	#N/A	#N/A	#N/A	#N/A	#N/A	#N/A
Solyc01g010640.3.1	NAD(P)-linked oxidoreductase superfamily protein	NL-OR#	205	22.1	9.54	MAMATTTTRSSAAAAAAAAATPLLSPTTSSLHTITRIPFISATPKCNRPITKLHVSSNPVASSSTSTSKPNQESIFFDGGAHYGDLAANLLLGFTLLWLPLTLASVFRAFYLRYRFTNLRVTVISGLTGQDRSDFSYKVIKDVQVVPRFIGEWGDVIITLKDGTVVDLRSVPKFREIAKYCLSMVDKESSGVSKEANTTDGPKGF	0.8884	0.00184134	0.921408	0.00596519	#N/A	#N/A	#N/A	#N/A	#N/A	#N/A	0.466516	7.05634e-06	0.353553	1.37217e-09	0.0947323	8.54104e-62	0.143587	1.26132e-15
Solyc09g082730.5.1	NAD(P)-linked oxidoreductase, aldo/keto reductase family protein	AKR	346	38.2	5.66	MEHNTQIQIPSVKLGSQGLEVSKLGFGCGGLSGFLNDPLSHEAGCAILQEAFSKGITFFDTANIYGHDGHNEIMVGKVLKQIPREQVQLATKFGCTFSEDLDGLQCQVKGTPQYVRQCCEESLKRLDVDYIDLYYQHRTDTSVPIEETMGELKKLVDEGKIRYIGLSEASVDTIKRAHAVHPITCVQMEYSLWTREIEEDVIPLCRELGIGIVAYSPLGHGFFGGKAITESLPEGSMMGSHPRFSGENLEKNKALFTRFANLAEKHGCTPPQLALAWLLHQGDDVVPIPGTTKIKNLNANIQSVAVKLTPEDVKEITDAIPVSEVCGARESGVMSKYEYRLADTRW	0.897494	0.0061032	0.986504	0.441345	#N/A	#N/A	#N/A	#N/A	#N/A	#N/A	#N/A	#N/A	#N/A	#N/A	#N/A	#N/A	#N/A	#N/A
Solyc09g083150.5.1	NADH dehydrogenase-like complex N	NDH-N	253	28.5	9.38	MTTLSYTFPSTTSSSSSTRRFLITSNGSSCRRRPNISTEDQPCSSSACYQGAVQSYGLQRQRVQLNGISKAVRTRRLDSVGRQKKGAIRCNIELQDFIGGDLIKPDLGQWLSDVEEHKAIAIYSPHEGGYEGRYLTRLKYQGYHFLDLSARGLGDPETTLTKFHPVCPAHVGKQPIARWYFPPEVDYRLSLLPPDAKGLVVWIIEAKVLSKAELQFLALLPTLRPNVRVIAECGNWRKFMWKPLKEIADLSQS	0.834032	0.00329516	0.859796	0.0198346	#N/A	#N/A	#N/A	#N/A	#N/A	#N/A	#N/A	#N/A	#N/A	#N/A	#N/A	#N/A	#N/A	#N/A
Solyc02g072160.4.1	NAD(P)-binding Rossmann-fold superfamily protein	NB-RFP1#	577	63.4	8.5	MNPERKPQEQEWRESERGKLAFGKMESCYFSVTKPSSSSTILNFQGVSSLGGRSSQKSLGAPSHLSWPLSGPNKKSQNFVYRRKTFKGPILAEAGKQVNSMDSSGITLVTGATGGVGRRVVDVLRNKKLSVRVLVRNEEKARRMLGEDVDLVVGDVTKASTLLPEYFKGITSVINAVSVIVGPKEGDTPDREKYSQGIKFFEPEIKGDSPEMVEYVGMKNLINAVKKNLGIRTGKLLFGYEGNSFKELPWGALDDVVMGGVSQSTFQIDLTGGENGGPTGLFKGVVTTANNGGFASIRTKNFSEPEDLSAYDGLELRLKGDGRRYKLIVRTSSDWDTVGYTAIFDTVEGWQSVRLPFSSLRPIFRARTVLDASPFDPSQITSLQLMFSKFESDGKLNPT…	0.938673	0.116903	0.875469	0.00776585	#N/A	#N/A	#N/A	#N/A	#N/A	#N/A	#N/A	#N/A	#N/A	#N/A	#N/A	#N/A	#N/A	#N/A
Solyc12g049280.3.1	NAD(P)-binding Rossmann-fold superfamily protein	NB-RFP2#	247	27	5.03	MDQILDYIEGGPKLRKWYGAPELLPKDGSLSEEDMSSEEDEVRDAVLVTDGDNEIGQMIILSLIIKRTRIKALVKDKRVAMEAFGTYVEPIAGDARDRSLLKKALSGVRAVICPNEGFISNLESWKGLQHVILLSQLSVYRGSSGVQAIVTANARKQAEQDESLVMASGIPYTIIRTGLLVNAPGGNQGFNIKEGCASQGKLSKEDAAFICVEALETVPQKGLTFEVVNGEDKVMDWKEWFATLIDK	0.9076	0.0113169	0.944497	0.0193786	#N/A	#N/A	#N/A	#N/A	#N/A	#N/A	#N/A	#N/A	#N/A	#N/A	#N/A	#N/A	#N/A	#N/A
Solyc06g071070.1.1	NAD(P)-binding Rossmann-fold superfamily protein	NB-RFP3#	261	27.2	7.15	MAETNVAQGQSLGNRVAIVTGSSRGIGKAIALHLASLGAKLVINYTSNSTQADDVVSQINSTSDSPRAIAVKANVSDPNQVKSLFDAAESAFQSPVNILVNCAGVLDGKYPSILNTTLEDFDRTFDVNVRGAFICCKEGANRIKRGGGGRIICLTSSMAVALRPGFGAYAASKAAVEAMVKILAKELKGTGITVNCAAPGPIATDMFYEGKTEEMIKKAIDECPHGRLGLPEDVAPVVGFLAGDASEWVNGQIIRVNGGYI	1.11444	0.067034	1.1672	0.000495874	2.2	0.270243	6.01	0.000127324	#N/A	#N/A	#N/A	#N/A	#N/A	#N/A	#N/A	#N/A	#N/A	#N/A
	Basic metabolism										#N/A	#N/A	#N/A	#N/A	#N/A	#N/A	#N/A	#N/A	#N/A	#N/A	#N/A	#N/A	#N/A	#N/A
	Lipid metabolism										#N/A	#N/A	#N/A	#N/A	#N/A	#N/A	#N/A	#N/A	#N/A	#N/A	#N/A	#N/A	#N/A	#N/A
Solyc02g093640.3.1	Very-long-chain 3-oxoacyl-CoA reductase	KCR	320	35.8	9.42	MESCIYHQLKSQPVWLLLLLSLGFLKVLCFSVIFLKWVYVNFLRPAKNLKKYGSWALVTGPTDGIGKGFAFELARKGLNLVLVGRNPDKLKDVSESIKAKYGQTQIKTVVVDFSGDLDEGVKKIKETIEGLDIGVLINNVGVSYPYARFFHEVDDKLLADLIKVNVEGTTKVTQAVLPGMIQRKRGAIVNIGSGAAIVIPSDPLYAVYAATKAYIDQFSRCLYVEYKKSGIDVQCQVPLYVATKMASIKRSSFFVPSTDGYARAALRWIGHEPRCTPYWPHSLLWGVLCSLPESMVDAWRLNFCIGIRRRGQLKDSRKKE	0.931637	0.224036	0.779225	0.000461427	#N/A	#N/A	#N/A	#N/A	#N/A	#N/A	#N/A	#N/A	#N/A	#N/A	#N/A	#N/A	#N/A	#N/A
Solyc12g017460.1.1	GDSL esterase/lipase At5g03980-like	GEL	369	40.8	9.13	MATFSLTKVSLSVLLVSLFFFSPSSAQTKCNVNSVYQLGDSLADAGNVIRTPGASIIFRADRSPYGETFFRKPTGRFSNGRVITDFISQSFKLPFLNAYLDRTASFSQGVNFAVAGATALDTSFWTARNIRLPTWNTPLSNQLTWFKSHLKSTCGSKCAENLKNSIVIMGEWGGNDYYNCFFQRKQISEVRSYVPFVVAGIMRGIKEVIQLGATRVLVPSIYPLGCLPLYLTSFPDNNTSGYDQLGCLKSFNDFASYHNRFVVRAMANLQRQFPNVSIVYGDFYGSILSLIRNPSSFGFNQNTLLSACCGTGGTHNFNFRTVCGGAGINACSNPAKYVHWDGIHLTDEAHRRISEVLVRDMLAKFNCVV	0.914638	0.251766	0.846665	0.000994679	#N/A	#N/A	#N/A	#N/A	#N/A	#N/A	#N/A	#N/A	#N/A	#N/A	4.59479	9.74183e-11	6.06287	3.70861e-16
Solyc06g051400.3.1	Omega-3 fatty acid desaturase	FAD	435	49.6	7.94	MASWVLSECGLRPLPKIYPKPTIGFSSSVSVSATSLNLRRISPSPIRTDRNCWALRVSAPLRIQIAGEEEEQTTNNGDEFFDPGAPPPFKLSDIKAAIPKHCWVKNPWTSMSYVVRDVAIVFGLAAAAAYFNNWLVWPLYWFAQSTMFWALFVLGHDCGHGSFSNNHSLNSVAGHILHSSILVPYHGWRISHRTHHQNHGHVENDESWHPLSEKLYNSLDDITKKFRFTLPFPLLAYPFYLWGRSPGKKGSHFDPNSDLFVASEKKDVITSTVCWTAMAALLVGLSFVMGPLQMLKLYGIPYWGFVIWLDLVTYLHHHGHEDKVPWYRGEEWSYLRGGLTTLDRDYGWINNIHHDIGTHVIHHLFPQIPHYHLVEATEAAKPVLGKYYKEPKKSGPLPF…	1.08679	0.459953	0.863298	0.0412796	#N/A	#N/A	#N/A	#N/A	#N/A	#N/A	0.406126	5.45169e-05	0.25	4.37071e-08	0.353553	2.26495e-12	0.378929	3.80027e-06
Solyc01g005985.2.1	Bifunctional inhibitor/lipid-transfer protein/seed storage 2S albumin superfamily protein	LTP	193	20.6	7.88	MSSKKLVTFELSFFFLILLLGFSSANLDKDREECANQLVGLATCLPYVSGEAKSPTPDCCTGLKEVLDKSKICLCILVKDRNDPSLGLKINATLALSLPTLCHAPPNMSNVSMCPELLHLAPNSPDAKVFQDFAKSAKGSSAAPSAPVSGNSSGKPANSSTNDKNDGGHKRRWMGFVEMTMGFLVILMLSYLT	0.915431	0.103075	0.898706	0.0289052	#N/A	#N/A	#N/A	#N/A	#N/A	#N/A	#N/A	#N/A	#N/A	#N/A	#N/A	#N/A	#N/A	#N/A
Solyc02g091100.3.1	2-hydroxyacyl-CoA lyase	HACL1	574	61.6	6.48	MSDSNHQTLSTVDGNTFVAMCLARAGVDRMFGVVGIPVTSLANRSVGLGIRFIAFHNEQSAGYAASAYGYLTGRPGILLTVSGPGCVHGLAGLSNATVNTWPMVLISGSSDQKEMGRGDFQELDQIEAVKPFSKYSAKATDITKIPSCVFSVLDWAVSGRPGGCYLDLPTDVLHQTISDTEAQKLIDDAESCRNKELIAKPIVQHSEIEKAAALLRKAERPLIVFGKGAAFSRAENALKNLVERTGIPFLPTPMGKGLLPDNHELAATAARSLAIGKCDVALIVGARLNWLLHFGEPPKWSKDVKFILVDVDKEEIELRKPCLGLVGDATKVVEMIHKEIKDDPFCLGKSHPWVEALSKKSKENVLKMEAQLAKDVVPFNFMTPMRIIRDAILQLGSPA…	1.04502	0.0397411	1.15827	0.000529478	1.78	0.692244	10.5	2.13027e-14	#N/A	#N/A	#N/A	#N/A	#N/A	#N/A	#N/A	#N/A	2.2974	6.8017e-05
	Amino acid metabolic process										#N/A	#N/A	#N/A	#N/A	#N/A	#N/A	#N/A	#N/A	#N/A	#N/A	#N/A	#N/A	#N/A	#N/A
Solyc07g053720.3.1	Tyrosine aminotransferase	TAT	422	46.9	5.34	MENGTTTGMRRWNFKENEKLVSVSDLTVRSVLNKLRCCVDPADTRPTIPLGHGDPSAFPCFLTTTIAEDAISDAVRSAKFNGYSSTVGILPARRAVAEYLSQDLPYKLSPDDIYLTSGCGQAIEILLNALARPNANILLPSPGFPYYEAWGGFTQMEMRHFNLLPEKEWEVDLNAVESLADENTVAMVIINPGNPCGNVYSEEHLKKVAETARKLGILVISDEVYAHLAFGSKPFVPMGIFGSIAPVVTLGSISKRWIVPGWRLGWLVTNDPNGILKEHGVIDSIMGYLNISTDPATFIQGAIPQILQETKDDFFSKIVNMLREDADICYERIKDIPCITCPSKPQGSMFLMVQLHLNLLEDIEDDLDFCAKLAKEESLIILPGVAVGLKNWLRITFAC…	1.13304	0.101632	1.16155	0.00022311	1.52	0.466887	3.3	1.05921e-07	#N/A	#N/A	#N/A	#N/A	#N/A	#N/A	#N/A	#N/A	#N/A	#N/A
Solyc04g074480.3.1	DAHP synthase 2 precursor	DAHPS2	541	59.9	8.73	MALSTNTTTNSLLSNKSLLQNQPLLSSPSKNAFFSNKSTKTVRFVQPIAAVHSSDSNKNPIVSDKPSKSSPPAATATTAPAPAVTKTEWAVDSWKSKKALQLPEYPDQEELRSVLKTIDEFPPIVFAGEARSLEERLGEAAMGRAFLLQGGDCAESFKEFNANNIRDTFRILLQMGAVLMFGGQMPVIKVGRMAGQFAKPRSDSFEEKDGVKLPSYRGDNVNGDAFDVKSRTPDPQRLIRAYCQSAATLNLLRAFATGGYAAMQRINQWNLDFTEHSEQGDRYRELASRVDEALGFMTAAGLTMDHPIMKTTEFWTSHECLLLPYEQSLTRRDSTSGLHYDCSAHFLWVGERTRQLDGAHVEFLRGIANPLGIKVSDKMDPSALVKLIEILNPQNKAGR…	1.13457	0.00688748	1.30933	0.000476185	3.13	0.0105858	4.29	0.00382864	2.14355	1.42238e-08	2	9.87849e-09	2.63902	4.02274e-19	24.2515	1.29102e-49	39.3966	2.18127e-43
Solyc01g098610.4.1	Glutathione synthetase 2	GS2	546	61.1	6.24	MGSGCSSPSISLTTIATSHFQSQESLSNSLNFYSPTRFLEPHLLKSSKIFIPKSPLKCAKVPEMQTQLEDSAKPIVDPHDIDSKLVQKLANDALVWCSLRGLLVGDRNSERSGTIPGVDMVHAPVALIPMSFPESHWKQACEVAPIFNELVDRVSQDGEFLQQSLSRTRKADPFTSRLLEIHSKMLEINKLEEIRLGLHRSDYMLDEQTKLLLQIELNTISSSFPGLSCLVSELHRSLLQQYREDIASDPNRIPANNAVNQFAEALAKAWNEYGDPRAVIIFVVQAEERNMYDQHWLSASLRERHQVTTIRKTLAEIDALGELQQDGTLVVDGQAVAVIYFRAGYAPSDYHSESEWKARLLMEQSRAVKCPSISYHLAGSKKIQQELAKPNVLERFLEN…	1.0603	0.14766	1.18707	0.00517791	#N/A	#N/A	#N/A	#N/A	#N/A	#N/A	#N/A	#N/A	#N/A	#N/A	#N/A	#N/A	#N/A	#N/A
Solyc10g083970.1.1	S-adenosylmethionine synthase	MAT	390	42.6	6.6	METFLFTSESVNEGHPDKLCDQVSDAILDACLEQDPESKVACETCTKTNMVMVFGEITTKAKVDYEKIVRDTCRGIGFTSPDVGLDADHCKVLVNIEQQSPDIAQGVHGHLTKKPEDIGAGDQGHMFGYATDETPELMPLTHVLATKLGAKLTEVRKNKTCPWLRPDGKTQVTVEYKNDNGAMVPIRVHTVLISTQHDETVTNDQIAKELKEHVIKPVIPAQYLDDKTIFHLNPSGRFVIGGPHGDAGLTGRKIIIDTYGGWGAHGGGAFSGKDPTKVDRSGAYIVRQAAKSVVAAGLARRCIVQVSYAIGVAEPLSVFVDTYKTGTIPDKDILVLIKENFDFRPGMMSINLDLKRGGNFRYQKTAAYGHFGRDDADFTWETVKALKPKA	1.05696	0.101254	1.18706	0.0104031	1.36	1	4.24	2.16283e-06	#N/A	#N/A	#N/A	#N/A	#N/A	#N/A	#N/A	#N/A	#N/A	#N/A
Solyc10g083760.3.1	Chloroplast threonine deaminase.1	TD1	606	66.1	6.37	MEVLRFTAVKSLNSCVRPEFTAMSSVIVPISTVKVSGTRKSKKKALICAKATEILSSPATVTEPLKAEPAEAPVPLLRVSPSSLQCEPGYLLPNSPVLGTGGVTGYEYLTNILSSKVYDVAYETPLQKAPKLSERLGVNVWLKREDLQPVFSFKIRGAYNMMAKLPKEQLEKGVICSSAGNHAQGVALSAQRLGCDAVIVMPVTTPDIKWKSVKRLGATVVLVGDSYDEAQAYAKKRAESEGRTFIPPFDHPDVIVGQGTVGMEINRQLKDNIHAIFVPVGGGGLIAGIAAYLKRVAPDIKIIGVEPLDANALALSLHHGQRVMLDQVGGFADGVAVKVVGEETYRLCEELIDGVVLVGRDAICASIKDMFEEKRSILEPAGALALAGAEAYCKYYGLK…	1.14372	0.0318089	1.11805	0.00193467	#N/A	#N/A	#N/A	#N/A	#N/A	#N/A	#N/A	#N/A	#N/A	#N/A	#N/A	#N/A	#N/A	#N/A
Solyc12g098490.2.1	Serine hydroxymethyltransferase	SHMT	471	52.2	7.52	MDPVSVWGNEPLNTTDPEIFDLIEKEKRRQCRGIELIASENFTSFAVIEALGSALTNKYSEGIPGNRYYGGNEYIDQIENLTRSRALQAFHLDPTKWGVNVQPYSGSPANFAAYTAVLNPHDRIMGLDLPSGGHLTHGYYTSGGKKVSATSIYFESLPYKLDFTTGYIDYDRLDEKAMDFRPKLLICGGSAYPRDWDYKRFREVADKCGALLLCDMAHISGLVAAQEAANPFEYCDLVTTTTHKSLRGPRAGMIFYRKGPKPPKKGQPEDAVYDFEDKINFSVFPSLQGGPHNHQIGALAVALKQSMTPGFKAYAKQVKANAVALGKFLMSKDYKLVTSGTENHLVLWDLRPLGLTGNKVEKLCDLANITVNKNAVFGDSSALAPGGVRIGTPAMTSRG…	1.14995	0.000889987	0.994757	0.864032	#N/A	#N/A	#N/A	#N/A	#N/A	#N/A	#N/A	#N/A	0.466516	0.00020366	0.287175	0.000112482	#N/A	#N/A
Solyc11g066890.1.1	Arogenate dehydratase	ADT	427	46.4	7.56	MQSLTPSSSGINLKSLIQTKIRSNRVNSIRPVITCVYRFDAANAAVNTGTANTNSAGHAGGSRADWQSSCAILASKVVSQQQNAEKSGGAGNITAVNGHKAAIDLDLVPIDNQPKPLTITDLSPAPMHGAQLRVAYQGVPGAYSEAAAGKAYPKCEAIPCDQFEVAFQAVELWIADRAVLPVENSLGGSIHRNYDLLLRHRLHIVGEVQLPVHHCLLALPGVRKEYLNRVISHPQALAQCELTLTKLGLNVTREAVDDTAGAAEYIASHNLRDTAAIASARAADLYGLQILAEGIQDDSSNVTRFVMLAREPIIPRTDRPFKTSIVFAHDKGTSVLFKVLSAFAFRNISLTKIESRPHRNRPIRLVDDANVGTAKHFEYMFYVDFEASMADVRAQNALA…	1.06346	0.00536839	1.19756	0.000719011	#N/A	#N/A	#N/A	#N/A	#N/A	#N/A	#N/A	#N/A	#N/A	#N/A	6.9644	1.7029e-17	6.9644	3.09719e-13
	Hormone signaling										#N/A	#N/A	#N/A	#N/A	#N/A	#N/A	#N/A	#N/A	#N/A	#N/A	#N/A	#N/A	#N/A	#N/A
Solyc10g008520.3.1	Auxin-responsive GH3 family protein	GH3	602	68.7	7.09	MEPSLDKSNYYTDTDEMINWFEKSAENAAAVQRQTLRRILELNHGVEYLKKWLGDIRLQDENAMESLYATMVPLASHADFEPYIHRIADGEKAPLLTQDPMRTLSLSSGTTEGRQKFVPFTHHSSQTTLQIFKLAAAYRSRIYSIREGGKVLEFIYSSKQTKTKGGLIAGTATTHYYASEEFKIKQQHTKSFTCSPEEVISSGDYKQSTYCHLLLGLYYCDEIEFVTSTFAYSIVQAFRSFEELWKELCHDIREGTLTSRINITKVRKVLLGMIVPNPELASRIESICEEVEKENWVSIIPKLWPNVKYVYTIMTGSMQPYLNKLRHYCGDLPLVSADYGSTESWIGVNVEPSSPPEKVTFAIIPTFSYFEFIPLHRSKSQSYNNSHKDANLLANDDFI…	0.930386	0.117986	0.888993	0.00429366	#N/A	#N/A	#N/A	#N/A	2.63902	7.38212e-12	#N/A	#N/A	0.329877	3.10936e-12	#N/A	#N/A	2	0.0492826
Solyc03g025850.3.1	Remorin 1	REM1	197	21.8	5.68	MAELEAKKVEIVDPAPAQEPVEAPKEVVADEKAIVEPAPPPPAEEKEKPDDSKALVVVENKAEEAADEKKEGSIDRDAVLARVATEKRLSLIKAWEESEKSKAENKAQKKVSAIGAWENSKKANLESELKKMEEQLEKKKAIYTEKMKNKIALLHKEAEEKRAMIEAKRGEDLLKAEELAAKYRATGTAPKKILGIF	0.986218	0.642872	0.870833	0.00406666	#N/A	#N/A	#N/A	#N/A	#N/A	#N/A	#N/A	#N/A	0.5	1.96566e-07	#N/A	#N/A	#N/A	#N/A
Solyc07g007870.3.1	12-oxophytodienoate reductase 3	OPR3	396	43.5	8.37	MASSAQDGNNPLFSPYKMGKFNLSHRVVLAPMTRCRALNNIPQAALGEYYEQRATAGGFLITEGTMISPTSAGFPHVPGIFTKEQVREWKKIVDVVHAKGAVIFCQLWHVGRASHEVYQPAGAAPISSTEKPISNRWRILMPDGTHGIYPKPRAIGTYEISQVVEDYRRSALNAIEAGFDGIEIHGAHGYLIDQFLKDGINDRTDEYGGSLANRCKFITQVVQAVVSAIGADRVGVRVSPAIDHLDAMDSNPLSLGLAVVERLNKIQLHSGSKLAYLHVTQPRYVAYGQTEAGRLGSEEEEARLMRTLRNAYQGTFICSGGYTRELGIEAVAQGDADLVSYGRLFISNPDLVMRIKLNAPLNKYNRKTFYTQDPVVGYTDYPFLQGNGSNGPLSRL	0.965686	0.151362	1.18452	0.00102563	1.74	0.579629	5.34	0.000221389	2.63902	9.55826e-10	#N/A	#N/A	#N/A	#N/A	12.1257	7.17196e-68	22.6274	2.15817e-63
Solyc09g061840.5.1	3-ketoacyl-CoA thiolase peroxisomal-like	PKT	512	54.2	8.41	MSPDIPLNFIGSFFGPLKIHYLIIRCVYKYEGTRSVVFNNPIFICAGLKGKKEELIMEKAIERQRVLLEHLQPIRSSSITPSVCLAGDSSAYHRTSAFGDDVVIVAAYRTAICKAKRGGFKDTLSDDLLAPVLKAVVEKTNLNPSEVGDIVVGTVLAPGSIRAMECRMAAFYAGFPDTVPIRTVNRQCSSGLQAVADVAAAIKAGFYDIGIGAGLEFMTVDNIGLVVKANPKVDAFAQARDCLLPMGITSENVAQRFGVTRLEQDQAAVISHQRAAAATASGKFKDEIIPVLTKIVDPQTGNEKPVVISVDDGIRPTTNLTGLAKLKPAFKRDGATTAGNSSQVSDGAAAVLLMKRSVAMQKGLPILGVFRSFAAVGVDPAVMGIGPAVAIPAAVKSAG…	1.07486	0.540911	2.12544	0.000959148	1.74	0.082159	7.69	5.99982e-24	#N/A	#N/A	#N/A	#N/A	#N/A	#N/A	#N/A	#N/A	#N/A	#N/A
Solyc06g068090.3.1	Phospholipase PLDa1	PLD1	809	92.1	5.64	MAQIQLHGTLHVTIFEVDNLQGEEEGGHFFSKIKQHFEETVGIGKGTPKLYATIDLEKARVGRTRIIENEPKNPRWYESFHIYCAHMASNVIFTIKDDNPFGASLIGRAYVPVEELLEGEEIDKWVEIMDKEMNPTAEGSKIHVKLQFFDVSRDPNWGRGIRSSRYPGVPYTFFAQRPGSRVSLYQDAHVPDNFIPKIPLSGGKYYEPHRCWEDIFDAITNAKHLIYITGWSVYTEIALVRDSRRQKPGGDIMLGELLKKKASEGVKVLMLVWDDRTSVGLLKKDGLMATHDQETEQYFQGTDVNCVLCPRNPDNGGSFVQDIQISTMFTHHQKIIVVDSALPSGELEKRRILSFVGGIDLCDGRYDTPFHSLFRTLDTAHHDDFHQPNFADGSITKGG…	1.01126	0.790202	1.1679	0.0011171	1.25	0.97386	2	0.00369805	#N/A	#N/A	#N/A	#N/A	#N/A	#N/A	#N/A	#N/A	3.24901	2.32403e-08
Solyc08g080130.3.1	Phospholipase PLDb1	PLDb1	846	95.6	7.21	MAHFSYSESMSGSSQHGVQVVPFKTSAGSLRVLLLHGNLDIWVREAKNLPNMDLFHKKLDNLLGGLAKLGSKKEGSPKITSDPYVTVSVSNAVVARTYVINNSENPIWMQHFYVPVAHYASEVHFVVKDNDVVGSQIIGAVGISVEQLCSGAMIEGTFPVLNSSGKPCKEGAVLTLSIQFTPMERVPLYHGGVGGDHEYQGVPGTYFPLRRGGKVTLYQDAHVPEGSLPNLWLENRVQYQHGQCWQDIFDAITQARRLIYITGWSVYHLVTLVRDNDNAEKSMLGEILKRKSQEGVRVLLLIWDDPTSKSILGYKTEGIMGTNDEETRRYFKHSSVQVLLCPRSAGKGHSWAKKQETETIYTHHQKTVILDADAGNYQRKIMAFVGGLDLCKGRYDTPA…	1.25307	0.0141916	1.38185	0.00188143	3.4	0.0202254	3.83	0.0455987	2.2974	0.000445894	4.59479	1.07297e-13	8.57419	1.20313e-23	13.9288	7.4347e-76	25.9921	1.41601e-35
Solyc11g071620.3.1	Aldehyde oxidase 1	AOX1	1361	148.7	6.61	MEERQKKGNLVFAVNGERFELPSVDPSTTLLHFLRSETCYKSPKLGCGEGGCGACVVLISKYEPKFKKVEDFSASSCLTLLCSLNGCSITTSEGLGNTRDGFHSIHERFAGFYASQCGFCTPGLCMSLFSALVNADKGNKPNPPPGFSKLTSSEAENAIAGNLCRCTGYRPIADACKTFAADIDIEDLGFNSFWKKGDSKEMKVSKLPPYDPTKNFSTYPEFLKSESATNLDSSKYPWYSPVSIKELWSLLNFNVTVNRGSFKLVVGNTGTGYYKETQRYDHYVDLRHIPELSIIKRDQTGIEVGATVTISKFISVLKEESHINLGSYGKLVSQKLADHMEKIASPFVRNSASVGGNLVMAQKNGFPSDIATLLLGLSATVSLMTSHGPENHTWEELLS…	1.10623	0.0331081	1.03253	0.370176	#N/A	#N/A	#N/A	#N/A	#N/A	#N/A	#N/A	#N/A	#N/A	#N/A	#N/A	#N/A	#N/A	#N/A
Solyc03g115700.3.1	SNF1-related protein kinase	SnRK	504	57.7	8.24	MSSRGGGIAESPYLRNYRVGKTLGHGSFGKVKIAEHLLTGHKVAIKILNRRKMKTPDMEEKLRREIKICRLFVHPHVIRLYEVIETPTDIYVVMEYVKSGELFDYIVEKGRLQEDEARKFFQQIIAGVEYCHRNMVVHRDLKPENLLLDARRNVKIADFGLGNIMRDGHFLKTSCGSPNYAAPEVVSGKLYAGPEVDVWSCGVILYALLCGTLPFDDENIPNLFKKIKSGVYTLPSHLSPLARDLIPRMLIVDPMKRISVADIRQHQWFKIHLPRYLAVPPPDARQHLKKLDEEILQQVTRMGLDRDQLLDSLQKRIQDDATVAYYLLYDNRSMASSGYLGAEFQESVDGYSSGLFPNLDLQLSSGNGVSEESLRRPFRKEKTWLVGLQSPANPKEIMN…	1.10583	0.0153948	1.02585	0.273023	1.48	0.364444	2.18	0.0395777	#N/A	#N/A	#N/A	#N/A	#N/A	#N/A	2	0.000138978	2.63902	8.17767e-07
Solyc07g049530.3.1	1-aminocyclopropane-1-carboxylate oxidase 1	ACO1	315	35.8	5.25	MENFPIINLEKLNGDERANTMEMIKDACENWGFFELVNHGIPHEVMDTVEKMTKGHYKKCMEQRFKELVASKGLEAVQAEVTDLDWESTFFLRHLPTSNISQVPDLDEEYREVMRDFAKRLEKLAEELLDLLCENLGLEKGYLKNAFYGSKGPNFGTKVSNYPPCPKPDLIKGLRAHTDAGGIILLFQDDKVSGLQLLKDEQWIDVPPMRHSIVVNLGDQLEVITNGKYKSVLHRVIAQTDGTRMSLASFYNPGSDAVIYPAKTLVEKEAEESTQVYPKFVFDDYMKLYAGLKFQAKEPRFEAMKAMESDPIASA	1.68559	0.000379269	2.76449	2.40421e-05	9.7	0.00101359	27.96	1.49261e-21	2.2974	0.0377515	4.92458	0.000637519	13.9288	1.20931e-06	103.968	3.34511e-84	119.428	2.56448e-77
Solyc04g014670.3.1	Short-chain dehydrogenase/reductase SDR	SDR	253	26.9	8.65	MEKIGKRFEGKVVIVTASSQGIGFSIAQRLGFEGASVVISSRKQENVDEAVKKLRDGGIEVLGLVCHVSNAQQRKNLIDKTIQKYGKLDVVVSNAAVNPSVDAILETKSSVLDKLWDINVKAAILLLQDAVPYLKKGSSVVLISSISGYSPPASMGMYGVTKTALLGLTKALAAEMSPDTRVNCVAPGFVPTHFADFITSNEQVRREIEGKTLLNRLGTTHDMAAAVAYLASDDASYVTGETLVVAGGMPSRL	1.10941	0.000356519	0.989232	0.750944	#N/A	#N/A	#N/A	#N/A	#N/A	#N/A	#N/A	#N/A	#N/A	#N/A	4	8.17658e-25	4.59479	9.17746e-18
	Chlorophyll biosynthetic process										#N/A	#N/A	#N/A	#N/A	#N/A	#N/A	#N/A	#N/A	#N/A	#N/A	#N/A	#N/A	#N/A	#N/A
Solyc06g007760.4.1	Ycf54-like protein	Ycf54	220	25.5	7.17	MSASTALNLASFCTSVVNSHTHFTHKPSLLLHGTQSSQSHNNTLFKNCSWKLNRTTKRAVAAVDSSDPAEKQETERKKYHFLVANAKFMLDEEEHFQEQMFERRRLYEERNMEPDFWLVVEPKFLDKFPNITKRLNRPAVALVSTNGPWITFMKLRLDRVLQESYEADSVEEALACTPVSIEFEKPEKWTAPYPKYESGWWDSFLPPGSQTSKNPEKFIG	0.987036	0.873426	0.777549	0.0239714	#N/A	#N/A	#N/A	#N/A	#N/A	#N/A	#N/A	#N/A	#N/A	#N/A	#N/A	#N/A	#N/A	#N/A
Solyc04g015750.3.1	CobN/magnesium chelatase	CobN	1381	153.6	6.28	MASLVSSPFTLPNSKVEHLSSISQKHYFLHSFLPKKTNPTFSKSPKKFQCNAIGNGLFTQTTQEVRRIVPENLKGLATVKIVYVVLEAQYQSALTAAVQTLNKNGEFASFEVVGYLVEELRDENAYKTFCKDLEDANIFIGSLIFVEELALKVKSAVEKERDRLDAVLVFPSMPEVMRLNKLGSFSMSQLGQSKSPFFQLFKKKKSSAGFSDQMLKLVRTLPKVLKYLPSDKAQDARLYILSLQFWLGGSPDNLVNFLKMVSGSYVPALKGVKMDYSDPVLYLDSGIWHPLAPCMYDDVKEYLNWYATRRDTNEKLKSSSAPVIGLVLQRSHIVTGDESHYVAVIMELEARGAKVIPIFAGGLDFSGPVERYFIDPITKKPFVNSVVSLTGFALVGGPA…	0.900149	0.0359419	0.854247	0.0213259	#N/A	#N/A	#N/A	#N/A	0.466516	0.00390833	0.217638	3.54706e-10	0.0947323	2.25401e-23	0.0192366	9.92969e-45	0.0334929	5.94745e-24
	Other metabolism										#N/A	#N/A	#N/A	#N/A	#N/A	#N/A	#N/A	#N/A	#N/A	#N/A	#N/A	#N/A	#N/A	#N/A
Solyc09g090980.3.1	Pathogenesis-related protein STH-2-like	PR-STH2	160	17.4	5.74	MGVNTFTHESTTTIAPTRLFKGLVLDFDSLVPKLLSHDVKSIEIVEGDGGAGSIKQMNFVEGGPIKYLKHKIHVIDDKNLVTKYSLIEGDVLGDKLESIAYDVKFEAAGDGGCVCKTTTEYHTKGDHVVSEEEHNVGKGKAIDLFKAIEAYLLANPSVYA	1.38801	0.0146941	1.39143	9.67457e-05	21.82	4.79696e-16	19.85	1.74145e-09	#N/A	#N/A	#N/A	#N/A	#N/A	#N/A	#N/A	#N/A	#N/A	#N/A
Solyc12g006460.2.1	Cytochrome P450	CYP4501	487	56.3	8.19	MDFYNLALFFIALILGIFTFYAILMRINGWYYAIKFCSNKYNIPNGYMGLPYFGNTLSYFKASMCGDPKSFIDFFATRFGEGGMYRAYIFGKPTIMVTKPEIIRKVLMDEEYLERGLPNYMKKLIGLTTSIEEDKYFRRLTAPVKSHGLLSDYFDYIDKTVSSTLEKYATTEEPVEFLHKMHKLTFEVFMRLLIGDEVNQELFDEMFEEITAVISGVHNLPINLPGFAYHKGLKARKVLGEVFKKLIDERREAMKDGKSMPKANIIDMLLSNNNQDYEANMLSDKKIIEILVLFSFAGFEPVALMSVKAIFHLQKHPHFLEKAKEEQEEIVKRRASSNAGLSFDEIRQMTFVSKIINETLRIATDQSVFLRDTSTTFNINGYTIPKGWKFFAVVWNIHM…	1.03665	0.632721	0.721845	0.0128891	#N/A	#N/A	#N/A	#N/A	2.63902	4.78368e-11	0.287175	1.98092e-11	0.143587	3.29505e-36	#N/A	#N/A	#N/A	#N/A
Solyc04g078290.5.1	Cytochrome P450	CYP4502	544	62	8.69	MSPQTQVFHLNPNNINTKKCNNSTNTFTFPFTMDYTLSPFLYAAPLLLAFYIITKHFLRKFHNHPPAPFLTFPIIGHLYLFKKPLQRSLAKISDRYGPVLLLQFGSRKVLLVSSPAGAEECFTKNDVVFANRPHLMAGKHLGYNFTSLAWSSYGDHWRNLRRITSVEMFSTHRLQMLHGIRVDEVKSMVKRINSSAMAEKSVDMKSMFFELMLNVMMRTIAGKRYYGENVEDIEEATRFREMVEETFRIGGATNVGDFLPALKLLVRKLEKSLLVLQQKRDEFMQGLIKGCRKRMEKDGTVTDSEIEGKKKSLIEVLLTLQEKEPEYYKDEIIRSLMLVLLAAGTDTSVGTMEWALSLMLNHPETLKKAQAEIDERIGHERLIDESDMNNLPYLRCIVN…	1.08611	0.398533	1.18383	0.000429191	3.67	0.0791911	12.85	3.91718e-14	#N/A	#N/A	#N/A	#N/A	#N/A	#N/A	#N/A	#N/A	#N/A	#N/A
Solyc06g150137.1.1	Cytochrome P450	CYP4503	505	58	9.26	MDLLLLEKTLIGLFFAILIAIIISKLRSKRFKLPPGPIPVPIFGNWLQVGDDLNHRNLTEYAKKFGDVFLLRMGQRNLAVVSSPELAKEVLHTQGVEFGSRTRNVVFDIFTGKGQDMVFTVYGEHWRKMRRIMTVPFFTNKVVQQYRGGWESEAASVVEDVKKNPESATNGIVLRKRLQLMMYNNMFRIMFDRRFESEDDPLFVKLRALNGERSRLAQSFEYNYGDFIPILRPFLRGYLKICKEVKEKRLKLFKDYFVDERKKLANTKSMDSNALKCAIDHILDAQQKGEINEDNVLYIVENINVAAIETTLWSIEWGIAELVNHPHIQKKLRDEIDTVLGPGVQVSEPDMPKLPYLQAVIKETLRLRMAIPLLVPHMNLHDAKLAGYDIPAESKILVN…	1.1359	0.0164977	1.2763	0.00301043	#N/A	#N/A	#N/A	#N/A	#N/A	#N/A	#N/A	#N/A	#N/A	#N/A	#N/A	#N/A	#N/A	#N/A
Solyc07g006890.1.1	Cytochrome P450	CYP4504	502	57.6	8.28	MTFIDLLLLFSLIPFFLIFFLKFQKARKNPISSNTKIPKSYPIIGSYFSLLANQEQRIQWLSDIILSTPKLTFTLIRPLNFHTIITANPSNVQHILKTNFSVYQKGQNSNNTLADFLSNGIFNVDGDIWKYQRQVASHEFNTRSLRKFVESVVDVEVSERLVPILANAAAEKNVVDLQDVLQRFAFDNICKIAFGYDPKYLLPNLPEAEFAVAFEDCVRLSSERFAVPFPLIWKMKRAFGIGSEKKLRIAVGEVREFAKRIVREKLNERSSLDSADLLSRFLSTGHSDEDFVVDIVISFILAGRDTTSAALTWFFWLISKNADVESEILREIGGKEEDVSMRYDEVKNMMYTHASLCESMRFYPPVPMDSKEVMKDDVLPDGTFVKKGMRVTYHPYAMG…	1.0039	0.201951	1.46394	2.4908e-05	2.39	0.0133534	19.73	8.70013e-07	#N/A	#N/A	#N/A	#N/A	2.46229	1.86456e-14	4	3.11412e-17	3.24901	5.25646e-07
Solyc07g019460.3.1	NADPH--cytochrome P450 reductase	CPR	715	79.2	5.29	MDSTSEKLSPFDFMAAIFKGGKIFDKLNSSLDSGDSTSPASLTALLMENKDLMMILTTSVAVLIGCAVVLMWRRSSTSARKVVELPKLVVPKSVVEPEEIDDGKKKIAIFFGTQTGTAEGFAKALAEEAKARYEKAIFKVIDMDDYAADDEEYEEKLKKEKLAFFFLATYGDGEPTDNAARFYKWFEEGKERGDCFKNLQYGVFGLGNRQYEHFNKIAKVVDELLAEQGGQRLVPVGLGDDDQCIEDDFAAWRELVWPELDKLLLDGDDATATTPYTAAVLEYRVVTYDKSNFDNDLTNTNGHANGHVIVDAQHPVRANVAVRKELHTPASDRSCTHLEFDISCTGLTYETGDHVGVYCENFVETVEEAERLLNISPDTFFSIHTDKEDGTPLGGSSLP…	1.13219	0.0860593	1.23617	0.00723995	#N/A	#N/A	#N/A	#N/A	#N/A	#N/A	#N/A	#N/A	#N/A	#N/A	#N/A	#N/A	#N/A	#N/A
Solyc01g074030.3.1	Beta-glucosidase	BG	517	58.6	9.01	MAFQGSFWAISLLIFLANFLSMIEFSKAANAKVPSHTISNPFNRTIFSPDFLFGASTSSYQYEGAWNEDGKGPSIVDTFVHTHPEKILDRSNGDIALDFYHRYKEDVKLAKFEGLDAFRISIAWTRILPKGSVKKGINQAGIDYYNSLINEIVALGIKPLVTLFHWDLPQALEDEYLGFLSPKVVDDYVDFVEICFKNFGDRVKLWATMNEPWIFTSTGYDSGSLAPGRCSAWMNNNCTIGNSGTEPYIAGHNILLAHAAASKLYRQKYKPIQKGQIGTIVVSHWFEPASNKPEDIKASIRALDFMLGWFMHPLTYGDYPTSMRKLVGKRLPKFTPKESMLVKDSCDFIGLNYYTSNFAAHISKPPNTVNISSGTDNLVNQTTSLNGKLIGDPTGVSIF…	1.00776	0.917095	0.887352	0.00278847	#N/A	#N/A	#N/A	#N/A	#N/A	#N/A	#N/A	#N/A	#N/A	#N/A	#N/A	#N/A	#N/A	#N/A
Solyc01g107820.2.1	TOMATO WOUND-INDUCED 1	TWI1	470	52.9	5.53	MGQLHFFFFPMMAQGHMIPTLDMAKLVACRGVKATIITTPLNESVFSKAIERNKHLGIEIDIRLLKFPAKENDLPEDCERLDLVPSDDKLPNFLKAAAMMKDEFEELIGECRPDCLVSDMFLPWTTDSAAKFSIPRIVFHGTSYFALCVGDSIRRNKPFKNVSSDTETFVVPDLPHEIRLTRTQLSPFEQSDEETGMAPMIKAVRESDAKSYGVIFNSFYELESDYVEHYTKVVGRKNWAIGPLSLCNRDIEDKAERGRKSSIDEHACLKWLDSKKSSSIVYVCFGSTADFTTAQMQELAMGLEASGQDFIWVIRTGNEDWLPEGFEERTKEKGLIIRGWAPQVLILDHEAIGAFVTHCGWNSTLEGISAGVPMVTWPVFAEQFFNEKLVTEVMRSGAG…	1.15066	0.0156451	1.6441	0.000542549	5.63	3.00203e-07	29.07	2.01332e-24	#N/A	#N/A	#N/A	#N/A	#N/A	#N/A	#N/A	#N/A	#N/A	#N/A
Solyc07g054190.4.1	Riboflavin synthase	RibE	280	30.6	8.21	MATISFKFASPSKPSNPSIAPKNPTIFNLLPTPSNPQLKRAFFLKSPAISPIFIRALKPQQCRSSSTPITSLFTGIVEEMGQIKQLGYDKPDSFTMKIQAKLILEDINLGDSISVNGTCLTVAEFDTQKLEFSVGLAPETLRKTSLIELEQGSLVNLERALRPSTRMGGHFVQGHVDGTGEIVELKTEGDSLWVKVKTAKEILRYIVPKGFIAVDGTSLTVVDVVDEEGCFNFMLVAYTQQNVVIPLKKVGQKVNLEVDILGKYVERLLSSGFVDSIKSS	1.07201	0.146349	1.12912	0.0370943	#N/A	#N/A	#N/A	#N/A	#N/A	#N/A	#N/A	#N/A	#N/A	#N/A	#N/A	#N/A	#N/A	#N/A
Solyc01g105560.3.1	GTP cyclohydrolase II/3,4-dihydroxy-2-butanone 4-phosphate synthase	DHBPS	552	59.7	6.54	MASINISFPSTTFHSRSQANFKLFSGLHSGDVVSLNGVSSGSFIRLNARPHLTIKSDFKITSALLSGEGDIRFQSRGEKTLFSSLSTGTETQPDAVTFATLEADGVPTTSGFLSDDDECDLDRPTEGFSSVPEAIEDIRQGKMVLVTDDEDRENEGDLVMAASKATPEAMAFFVKYGTGIVCVSMTEEHLERLQLPLMVNDKKNEEKLCTAFTVSVDAKHGTTTGVSAHDRATTVLALASGDSKPEDFNRPGHIFPLKYREGGVLKRAGHTEASVDLAVLAGLDPVGVICEVVDDDGSMARLPMLRQFAKEHNLKIISVADLIRYRRKTDQLVEHASAARIPTMWGPFTAHCFKSIIDGIEHIAMVKGDIGDGQDILVRVHSECLTGDIFGSARCDCGS…	1.01562	0.621554	1.26116	0.00832172	1.47	0.443145	2.22	0.00062599	#N/A	#N/A	#N/A	#N/A	#N/A	#N/A	#N/A	#N/A	#N/A	#N/A
Solyc01g088480.3.1	UMP-CMP kinase	UMK	209	22.9	5.99	MGTVVESANQGAVSLPTNKKVTVIFVLGGPGSGKGTQCANIVEHFGYTHLSAGDLLRAEIKSGSENGTMISNMIKEGKIVPSEVTVKLLQRAIQENGNDKFLIDGFPRNEENRAAFELVTGIEPEFVLFFDCPEAEMEKRLLGRNQGREDDNIETIKKRFNVYMESSLPVIEHYNSKGKVRKIDAVKPVGEVFEAVKAVFAPSNEKVAA	1.0801	0.0293694	1.11072	0.00950737	1.8	0.538279	3.75	1.51637e-09	#N/A	#N/A	#N/A	#N/A	#N/A	#N/A	#N/A	#N/A	2.14355	0.000600455
Solyc10g074590.2.1	Pantothenate kinase	PANK	367	40.8	5.11	MESSGELVPFPLLTTPIESNYRACTIPYRFPSDNPKKPTPTELSWIDLFMNSIPSFRKRAESDDSVPDAPIRAEKFAQRYSAILEDMKKDPESHGGPPDCILLCRLREQVLREVGFRDIFKKVKDEENAKAISLFKDVVSLNDAIEDEAKRVENLVRGIFAGNIFDLGSAKLAELFSEDGISFLASFQNLVPRPWVIDDLDVFITKWSKKTWKKAVIFVDNSGADVILGILPFARELLRHGAQVVLAANDLPSINDVTYPELVEIISKLKDEHGKLIGVDTSNLLVANSGNDLPVIDLTTVSQELAYLASDADLVIVEGMGRGIETNLYARFKCDSLKIGMVKHPEVAQFLGGRLYDCVFKFNEASS	0.868822	0.00562477	0.884686	0.00703365	#N/A	#N/A	#N/A	#N/A	#N/A	#N/A	#N/A	#N/A	#N/A	#N/A	#N/A	#N/A	#N/A	#N/A
Solyc02g094420.3.1	Shikimate kinase	SK	250	27.6	6.68	MKVVQLAQPFVVPTFCHHLKPPRAVSKHNHDFTISLTLKRKAAEISPDLKGTCLFLVGINSSIKSNSAQLLADALRYYYFDSDSVVEQALGGKDAVRSFMKTDLKGFRDSETEVLKQLSSMGRLVVCAGNGAVQCAANLALMRHGISIWIDVPLDMVAKQIVEEKFQLPAAEAINGSYSEVLTQLTAIYEDSRNGYATADTTIALQNTASRLGYDTLDAVTTEDMVLETLKEVERLMRSKKLMEEAARPF	1.12388	0.162661	1.10925	0.00335401	#N/A	#N/A	#N/A	#N/A	#N/A	#N/A	0.435275	3.21308e-05	0.378929	1.82997e-05	0.0883883	1.17106e-63	0.125	3.3514e-18
Solyc09g091070.3.1	Malate dehydrogenase	MDH	298	31.8	5.54	MSPLVSSLHLYDIANVKGVAADLSHCNTPAQVFDFTGASELANSLKGIDVVVIPAGVPRKPGMTRDDLFNINANIVKSLVEAVADNCPDAFIHIISNPVNSTVPIAAEVLKQKGVYDPKKLFGVTTLDVVRANTFVAQKKNLKLIDVDVPVIGGHAGITILPLLSKTRPSTTFTDEEVQELTVRIQNAGTEVVEAKAGAGSATLSMAYAAARFVESSLRALDGDADVYECSYVQSDLTELPFFASRVKLGRNGIEALISSDLRGLTEYEQKALEALKIELKASIEKGIAYAQKQTVSA	1.10158	0.362398	0.865317	0.0313927	#N/A	#N/A	#N/A	#N/A	#N/A	#N/A	#N/A	#N/A	#N/A	#N/A	#N/A	#N/A	#N/A	#N/A
Solyc05g050120.3.1	Cytosolic NADP-malic enzyme	NADP-ME	579	64.1	6	MESALKDLSTPTGGVEDVYGEDCATEDQCITPWTIAVSSGYNLLRDPRYNKGLAFTERERDAHYLRGLLPPVISSQELQEKKLMQSIRQYDVPLHKYVAMMELEERNERLFYKLLIDNVEELLPIVYTPTVGEACQKYGSLFKRPQGLYISLNEKGRILEVLKNWPEKSIQVIVVTDGERILGLGDLGCQGMGIPVGKLALYTALGGVRPSACLPITIDVGTNNEKLLNDEFYIGLRQRRATGQEYYDFLHEFMSAVKQNYGEKILVQFEDFANHNAFELLAKYRTSHLVFNDDIQGTASVVLAGLIASLKLLGGALCDHTFLFLGAGEAGTGIAELIALEISNKTNIPVEETRKKIWLVDSKGLIVSGRKETLQAFKKPWAHEHEPVNNLLDAVKAVK…	1.33138	0.000109394	1.30795	0.00283453	3.9	1.08254e-11	5.06	2.50825e-08	#N/A	#N/A	4.59479	2.62353e-10	7.46426	1.13007e-15	2.82843	3.112e-09	8.57419	1.7899e-15
Solyc11g065240.2.1	Saccharopine dehydrogenase	SDH	430	46.6	6.6	MASLGMYSWTTGIKKRVFVRAANLAKENEKRVEVAEKVRNSKAVILGGTGRVGGSTAIALSKLCPDLNIVIAGRNREKGAAMVSKLGKNAEFAEVNIDDREALEANLTDADIVVHAAGPFQQSENCKVLEAAIGTKTAYLDICDDTSYATRAKSYMNMALEANIPAITTAGIYPGVSNVMAAELVRTAKLESEGELERLRFYYYTAGTGGAGPTILATSFLLLGEDVIAYNKGEKIKLTPYSGMLSIDFGMGIGKKDVYLLNLPEVKSVHEVLGVPTVSARFGTDPFFWNWGMIAMRNLLPQEFLRDRSKVQQLVQLFDPVVRAVDGTAGEAVSMRVDLECSDGHNRIGIFSHKRLSRSVGISTAAFVLAMLEGSTKPGVWFPEEPEGIAVEAREVLLQ…	0.904656	0.0132098	0.97736	0.3092	#N/A	#N/A	#N/A	#N/A	#N/A	#N/A	#N/A	#N/A	0.5	1.35065e-05	0.125	2.56355e-28	0.164938	3.72338e-09
Solyc05g025810.3.1	Strictosidine synthase	STR	357	39.6	6.01	MDSMLYFSFLMVILVAIILQLVLFSPISPQILEIPSPSPTFTSNSYLQRVSKVGEGFVDRPEDVAVDKMGVVYTATRDGWIKRMHKNGSWESWKYIGRDTLLGLKVSSAGHIIVCDAQEGLLKVTEDAVTVLASHVNGEKIRLADDVVEASDGSVYFSVASTKFGLHEWFLDVLEAKPHGQLLKYSPSLNQTSVIIDNLAFANGVALSADQDYLVVCESWKFRCQKYWLKDEMKGQTEIFIDNLVGAPDNIKLAPDGSFWIALVQVTAPRLNFIHKSRASKHLLATFPKLMKWVMGAYDKAMVVNVAADGKITKGFDDPNGKVMSFVTSVLEYDDHLYLGSLSCDFIGKLPLTTSTD	1.00995	0.846397	0.906611	0.0415354	#N/A	#N/A	#N/A	#N/A	#N/A	#N/A	0.406126	2.72208e-06	0.25	1.04959e-10	0.143587	7.99446e-19	0.217638	1.66099e-08
Solyc03g117430.3.1	Cobalamin biosynthesis protein CobW	CobW	459	51	6.34	MASLSIDIATTFMGLAKRQTPQFYGLRTAVFPTLWKTSKCQRFSLSTSSSSRISVAINTSSKPNRFSRGFTVSATSTSAPQSEDSDILTKIPQDNRIPATIITGFLGSGKTTLLNHILTADHGKRIAVIENEYGEVDIDGSLVAAKTAGAEEIMMLNNGCLCCTVRGDLVRMIAELVSRKKGKFDHIVIETTGLANPAPIIQTFYAEDQVFNDVKLDGVVTLVDSKHVGFHLDETKPKGVVNEAVEQIAYADRIIINKTDLVGDSEVSSLIQRIKNINKMAHLKRTQFGKVDLDYVLGIGGFDLERIESSVGAEGSKEDHTGHDHDHDHDHHHHHDHDHDHEHDHKHEHHDHHHSHDHTHDPGVSSVSIVCEGTLDLEKANMWLGTLLMERSDDIYRMK…	0.915734	0.0118794	0.909826	0.00661282	#N/A	#N/A	#N/A	#N/A	#N/A	#N/A	#N/A	#N/A	#N/A	#N/A	#N/A	#N/A	#N/A	#N/A
Solyc10g049620.2.1	Progesterone 5-beta-reductase 4	5β-POR	388	43.7	5.82	MSWWWAGAIGAAKKKFEDDEAPPKYESVALIIGVTGIVGNSLAEILPLADTPGGPWKVYGVARRARPSWNADHPIEYVQCDISNPEDTQSKLSVLTDVTHVFYVTWANRSTEVENCEINGKMFRNVLNVIIPNCPNLRHICLQTGRKHYLGPFELYGKVSHDPPFHEDLPRLDAPNFYYVLEDILFKEVEKKEGLTWSVHRPGTIFGFSPYSLMNIVGTLCVYAAICKHEGLPLKFPGVKGAWDGYSDCSDADLIAEHQIWAAVDPYAKNEAFNVSNGDVFKWKHFWKVLGEQFGLEAAEFDEGKRCTLVEMMKDKGAVWDEIVKENGLVPTKLEEVGVWWFVDLILSGDCALDTMNKSKEHGFLGFRNSQKAFISWIDKVKAYKVVP	1.12689	0.0197537	1.05358	0.00835123	#N/A	#N/A	#N/A	#N/A	#N/A	#N/A	#N/A	#N/A	#N/A	#N/A	#N/A	#N/A	#N/A	#N/A
Solyc07g043420.3.1	2-oxoglutarate-dependent dioxygenase 2	2OGDD2	342	38.2	5.64	MADLLSNWSSTLEAVPKSHCIPEHERPSDPVEIGDSIPVIDLGKANGEERSVVVKDLLKAFEEYGFFQIINHGVPVDLMDEAMKVYKEFFSLPAEEKENYAKDAANNTNRGAATLYSSSAKHYDSEEHRYWRDVLEHSCNLDGEDKKTWPDNPPRYREVIGAYGDELRRVSKVILGMLSEGLGLEAGFFDKELGQRMLVNHYPACPNPSLTLGVGGHCDPNLITIIQQEVYGLQILKDDKWIGVQPIRNAFVVNSGLPITVYSNGKLTSVAHRVVTNTTESRTSIGTFICPHEIVEPAKALVGPENPPQFKPFHWGIDFMPHYLSKKSVYHASLEPFKTEAN	1.20795	0.0330061	0.954961	0.463443	#N/A	#N/A	#N/A	#N/A	#N/A	#N/A	0.176777	2.79938e-11	0.0769465	4.66814e-22	0.00480916	2.17416e-96	0.0669858	0.000601763
Solyc03g094175.1.1	Transcriptional coactivator/pterin dehydratase	PCDH	210	23.1	7.78	MAAATHLSFSPPISVSSLPLRKPNFVTPNLQTSQSRICTRIRCNTNLLGDFGARDPFPAEVESKFGEKVLGNPDTEHKILIPAASALSLANQECTDISPNQTPLSEFEAKQLLFKVVGWRIANEDGVLKLQCTWKLKDFDCGVELINRIGKVVEGTGHLPTLHQLQQSNQVHAELWTPSIGGLSMNDFIIAAKIDQVKTSDLVPRKRVWA	1.14825	0.342528	1.62018	0.00853732	#N/A	#N/A	#N/A	#N/A	#N/A	#N/A	#N/A	#N/A	#N/A	#N/A	#N/A	#N/A	#N/A	#N/A
Solyc07g049645.1.1	Benzyl alcohol O-benzoyltransferase	BEBT	294	32.2	8.66	MSDAAGLVQFMTAVGEMARGASVPSTLPVWSRELLNSRDPPRVTCTHHEYDEVPDTKGTIIPLDDMVHKSFFFGPSQVSALRRFIPPHLRKSSTFELLTSVLWRCRTISLKPDPEEEVRVLCLVNARSKFNPPLPNGFYGNAFAFPVAVTTAAKLCKNPLGYALELVKKAKSDVTEEYMKSVADLMVMKGRPHFTVVRTYLVSDVTRAGFGEVDFGWGKAAYGGPAKGGVGAIPGVASFYIPFKNKNGENGIVVPVCLPAFAMEIFVRELNGMLKSEEDPLGKYTNYAIIKPAL	1.3188	0.0305909	2.29264	0.00811681	#N/A	#N/A	#N/A	#N/A	#N/A	#N/A	#N/A	#N/A	#N/A	#N/A	#N/A	#N/A	#N/A	#N/A
	Membrane and transport										#N/A	#N/A	#N/A	#N/A	#N/A	#N/A	#N/A	#N/A	#N/A	#N/A	#N/A	#N/A	#N/A	#N/A
	Channel proteins and transporters										#N/A	#N/A	#N/A	#N/A	#N/A	#N/A	#N/A	#N/A	#N/A	#N/A	#N/A	#N/A	#N/A	#N/A
Solyc09g074940.3.1	(DB240) meloidogyne-induced giant cell protein	MI-GCP#	1403	151	4.61	MDSEEATFSPPAVSSSPGSSPINNSSSNHTETENVSKINVEINDSDINSNSNSEGKSASDVTIVGGQQELPIPADPDEGTLEKTIGEEKLDDSVVGSAEIEKPVSEVSMSEGVENVEALGGDVGGSVPVIGNSLPDSTDSDATKSLGTGIEGSEGNTEEFDSVDKLNSIEQVKDNGGEVAVGAGLKEGEDRSTQEEVKETVEDEKMEPKEGGDRSIEEEVKETVEDEKIELQGGEDRSIQEEVKEIVEDEKNEALTSVASSNLKEAEEPTSVIEESAIASSNLKESEEPTSVFEEVAIASSNLKEAEEPTSVIEERAIHSDDAEKLNKVVVEQPSESLLAETGSKKFTSEGDAVVDAIEVNVSGPGVAVVGDVDESKEVEEHIEGTHDENVTSVNDVGE…	0.93672	0.757565	0.749257	0.0184756	#N/A	#N/A	#N/A	#N/A	#N/A	#N/A	#N/A	#N/A	#N/A	#N/A	#N/A	#N/A	#N/A	#N/A
Solyc02g087150.3.1	Heavy metal transport/detoxification superfamily protein	HIPP	186	19.5	4.77	MATVSAFSVCRAKSHSRIPHSSSNAIPQLFPMQFLRCQSNRSIGGGYSCSSSSVKAKVPLRTTRICSATEEDGATAVAEEESAAPTTSDQTVSVSVSPSDVLTMFFQAEGTMNEAAIPSVTNSLEDIEGITGLKIQVVEGIASVELTKQTTIQATGVASSLVETIQGSGFKLQTLNLSFQDEEDIS	0.930857	0.141073	0.894324	0.0221539	#N/A	#N/A	#N/A	#N/A	#N/A	#N/A	0.353553	5.9905e-07	0.203063	7.19104e-13	0.0358968	2.53204e-84	0.0717936	4.58822e-12
Solyc04g080190.3.1	Outer envelope pore protein 24, chloroplastic	OEP24	212	23.6	9.14	MKASFKARYEPDKAAANATVAFNAGDLKLRASMTDATVVKGPSLNGLALAVEKPGLFIVDYNVPKKDIRFQFMNSIKVLEKPLNLNYIHFHGDKRTILDGTLVVDSANKVSANHVMGSGSCKLKYTYVHGGITTFEPIYDTAKNAWDFMVSRKVYGDDVFKATYQTTSKNLGLEWSRSSKLNGSFKICASLCLLEERKIPKLSAETSWDFEM	0.9548	0.487735	0.903002	0.0235741	#N/A	#N/A	#N/A	#N/A	#N/A	#N/A	#N/A	#N/A	#N/A	#N/A	#N/A	#N/A	#N/A	#N/A
Solyc11g069090.2.1	ATP-binding ABC transporter	ABCT	601	67.1	6.62	MVSDAAKKRDAQKKAAAAARRGGKGAAAPKSAATASKSAVESNGVDNLTNGVGDLQISDRTCTGVLCSHPLSRDIRIESLSVTFHGHDLIVDSELELNYGRRYGLLGLNGCGKSTLLTAIGLRELPIPDHMDIFHLSREIEASDMTSLEAVINCDEERLQLEKEAEALAGQDDGGGEQLERIYERLEAMDAATAEKRAAEILFGLGFDKKMQAKKTRDFSGGWRMRIALARALFMNPTILLLDEPTNHLDLEACVWLEESLKNFERILVVISHSQDFLNGVCTNIIHMQNKKLKLYTGNYDQYVQTRSELEENQMKQYKWEQEQISAMKEYIARFGHGSAKLARQAQSKEKTLAKMERGGLTEKVGRDSVLVFRFTDVGKLPPPVLQFSEVAFGYTPDN…	1.09364	0.0813842	1.11651	0.0469983	#N/A	#N/A	#N/A	#N/A	#N/A	#N/A	#N/A	#N/A	#N/A	#N/A	#N/A	#N/A	#N/A	#N/A
Solyc03g114950.2.1	ABC transporter B family member 27	ABCB27	638	68.3	8.32	MDCQLGVQGHGFGNARTPLLDRPALGRKRNDAGDGQLGDLEHGDSVPAPNVGFGRVISLAKPEAGSLVLATIALLFAATSSILIPKFGGKIIDIVSGDIQTPEQKSEALNAVKNTILEIFLIVIVGSVCTALRAWLFSSASERVVARLRKNLLSHLVHQEIAFFDVTRTGELLSRLSEDTQIIKNAATTNLSEALRNLATAFIGLGFMFQTSWKLTLLSLAVVPVISVAVRRFGRYMRELSHKTQAAAAVASSIAEETFGAIRTVRSFAQEDYEISRYSEKVDETLNLGLGQAKVVGLFSGSLSAASTLSVIVVVIYGATLTIQGAMTPGALTSFILYSLTVGSSVSGLSGLYTVAMKAAGASRRVFQILDRTSSMPKSGDLCPMGDQAAEVELDDVWF…	1.04896	0.125745	1.21346	0.00315381	1.49	0.331983	5.82	4.44744e-07	#N/A	#N/A	#N/A	#N/A	#N/A	#N/A	#N/A	#N/A	#N/A	#N/A
Solyc09g091660.3.1	Pleiotropic drug resistance protein	PDR	1440	162.5	7.17	MEPANLGNLRGSSLRGSISGSRRGSVSLRANSNSIWRNTGVEIFSRSARDEDDEEALKWAALEKLPTFDRLRKGLLFGSQGAAAEIDIDDIGLQERKNLLERLVRVADEDNEKFLLKLKNRIDRVGIDLPTIEVRYENLNIEADAYVGSRGLPTFINFMTNFLETLLNTLHILPSSKRQITILKDISGIIKPCRMTLLLGPPSSGKTTLLLALAGKLDSSLKVTGKVSYNGHELHEFVPQRTAAYISQHDLHIGEMTVRETLEFSARCQGVGSRYEMLAELSRREKAANIKPDPDIDIYMKASATEGQEANVVTDYVLKILGLDICADTMVGDEMLRGISGGQKKRVTTGEMLVGPSKALFMDEISTGLDSSTTYSIVNSLRQSVQILKGTAVISLLQP…	1.19089	0.00291481	1.5213	0.00067503	2.69	0.335315	5.9	0.00017799	#N/A	#N/A	#N/A	#N/A	#N/A	#N/A	#N/A	#N/A	#N/A	#N/A
Solyc04g005653.2.1	Peroxisomal nicotinamide adenine dinucleotide carrier	NDT	350	38.1	9.89	MSSALANGLAGAGGGIIAQIITYPLQTVNTRQQTERVSREGRDSRGSALFQILQVVRSEGLPGLYSGLKPSLLGTAVSQGVYYYFYQVFKNRAEAIAAANKKRGRGDGSVGMLSWLVVAALAGSVNVLLTNPIWVLVTRMQTHTQAERKIVEAKRETLLKEASQSVLTASSLEVQLAELDSLKPHPYGTLQAAREVYNESGVTGFWKGVIPALIMVSNPSIQFMIIESLSKQLRAKRAAKNKDQQNITALEVFIIGAFAKLGATVCTYPLLVVKSRLQAKQEISGNVSLRYSGTVDAIIKMIHHEGFRCFYQGMRTKIVQSVFAASVLFMVKEELVKVYAVLANKSKVNV	1.12491	0.0143497	1.08628	0.0354541	#N/A	#N/A	#N/A	#N/A	#N/A	#N/A	#N/A	#N/A	#N/A	#N/A	#N/A	#N/A	#N/A	#N/A
Solyc02g094140.4.1	Mitochondrial import receptor subunit TOM20	TOM20	204	22.6	5.41	MDMQSDFDRLLFFEHARKTAETTYATDPLDAENLTRWAGALLELSQFQSVSESKKMISDAISKLEEALEVNPQKHDAIWCLGNAYTSHGFLNPDEDEAKIFFDKAAQCFQQAVDADPENELYQKSFEVSSKTSELHAQIHKQGPLQQAMGPGPSTTTSSTKGAKKKSSDLKYDVFGWVILAVGLVAWIGFAKSNMPPPAHPLPR	1.13426	0.108174	1.15856	0.0496793	#N/A	#N/A	#N/A	#N/A	#N/A	#N/A	#N/A	#N/A	#N/A	#N/A	#N/A	#N/A	#N/A	#N/A
Solyc11g017010.2.1	SlSUT1	SlSUT1	511	54.1	9.19	MENGTKGKLTVSSSLQIEQPLPPSKLWKIIVVASIAAGVQFGWALQLSLLTPYVQLLGIPHRFASFIWLCGPISGMIVQPVVGYYSDNCSSRFGRRRPFIAAGAALVTIAVFLIGFAADLGHASGDPLGKGSKPRAIAVFVVGFWILDVANNMLQGPCRALLADLSGGKSGRMRTANAFFSFFMAVGNILGYAAGSYSRLFKVFPFSKTKACDMYCANLKSCFFIAIFLLLSLTTLALTLVRENELPEKEELEIDEKLSGAGKSKVPFFGEIFGALKDLPRPMWILLLVTCLNWIAWFPFFLYDTDWMAKEVFGGQVGDAKLYDLGVRAGALGLLLQSVVLGFMSLGVEFLGKKIGGAKRLWGILNFVLAICLAMTILVTKMAEKSRRHDAAGTLMGPT…	1.15832	0.0282012	1.12389	0.0207859	#N/A	#N/A	#N/A	#N/A	#N/A	#N/A	#N/A	#N/A	#N/A	#N/A	0.25	1.0229e-10	0.378929	4.79376e-05
	Vesicular transport										#N/A	#N/A	#N/A	#N/A	#N/A	#N/A	#N/A	#N/A	#N/A	#N/A	#N/A	#N/A	#N/A	#N/A
Solyc02g072130.3.1	Protein transport protein Sec.1	Sec1	475	51.9	8.81	MGGGFRVLHLVKPFLSFLPEVQSADRKVQFKEKVIYTVIALAIFLVCSQLPLYGIHSTTGADPFYWMRVILASNRGTVMELGITPIVTSGMVMQLLAGSKIIQVDNNVREDRALLNGAQKLLGILIAVGEAVAYVLSGMYGSVSQLGVGNAILIILQLCFAAIIVMCLDELLQKGYGLGSGISLFIATNICESIIWKAFSPTTINTGRGAEFEGAIIALFHLTITRSNRISALREAFYRQSLPNVTNLLATVLIFLIVIYFQGFRVVLPVRSKNARGQQGSYPIKLFYTSNMPIILQSALVSNLYFISQLLYRRYGGNFIVDMIGTWKESEYSGQSVPVAGLAYLVTAPSSLAEMVSHPFHALFYIVFMLSACALFSKTWIEVSGSSARDVAKQLKEQQ…	0.972935	0.724317	1.10201	0.0350721	1.47	0.432245	2.69	4.68503e-05	2.14355	3.47071e-05	2.14355	1.94914e-06	2.82843	3.19793e-10	6.06287	2.2712e-32	9.18959	4.09523e-25
Solyc04g071350.3.1	Exocyst complex component SEC5B	SEC5B	1106	124.6	5.59	MSTDTDDEDELLQIALQEQAQRNINYQKPSKQPSKPVRNFVQPPSQPNLRVAAGATSERKNPNIAAAMQKTSNKSSSNQRKTVEDDDDSEIEMLSISSGDEDSSKDRGFGSRNRVVSGGGRAGREDDGLWDGGEPDSWKRVDESELRRRVREMREARVVATTQKPEQEKTAVPKKDLNNLQSFPRGMECVDPLKLGIVDNRTLRLISENISSSPSIGDRDHLDPNVRERLNYFSEKFDPKLFLCRIHQDTSASELESGALAVKTDLKGRTLQRKQLVKENFDCFVSCKTTIDDIESKLRRIEEDPEGSGTSHLFNCIEGVSSIANRAFGPLFERQAQAEKIRSVQGMLQRFRTLFNLPSTIRHSISTGEYDLAVREYRKAKSIVLPSHVGILKRVLEEV…	0.835549	0.28235	0.783308	0.00198852	#N/A	#N/A	#N/A	#N/A	#N/A	#N/A	#N/A	#N/A	#N/A	#N/A	#N/A	#N/A	2.14355	0.000657111
Solyc09g010370.3.1	Rab family GTPase	Rab	216	23.9	7.83	MAAPPARARADYDYLIKLLLIGDSGVGKSCLLLRFSDGSFTTSFITTIGIDFKIRTIELDSKRIKLQIWDTAGQERFRTITTAYYRGAMGILLVYDVTDESSFNNIRNWIRNIEQHASDNVNKILVGNKADMDESKRAVPTSKGQALADEYGIKFFETSAKTNMNVEEVFFSIARDIKQRLAESDSKAEPQTIRINQPDQGAGSSQGAQKSACCGS	0.877942	0.0140144	0.960151	0.0298996	#N/A	#N/A	#N/A	#N/A	#N/A	#N/A	#N/A	#N/A	#N/A	#N/A	#N/A	#N/A	#N/A	#N/A
Solyc08g005070.4.1	Arf GTPase activating protein	GAP	374	41.7	9.91	MAADSFTDKNAVFRKLKAKPENKMCFDCNAKNPTWASVTYGIFLCIDCSATHRSLGVHISFVRSTNLDSWSPDQLKMMYFGGNNRAQVFFKQHGWTDGGKIEAKYTSRAAELYKQLLSKEVAKSKAEDTGLPTSPVASQLVQTTNGFSNIKISEAPKETSLFKDETPEVSASPKASQSMFTTSIKKPIVAKKSGKPGGLGARKLTKKTSESLYDQKPEEPPVQVSSSNPASSAPTGGSSFTSRFEYTDNVQSSEMSSGRVLNHVSLQCPPIFLRTMEWKAVSQRKAQNLPKFKSRKLMMQGRSLLMQKQFHLPNSLVIRAKLKWKPQFLLRSSRVQVPYQVQTFLVTMIDQIWTSLLVISLTGSHSRHNRTCPL	1.02549	0.622049	0.905401	0.0186786	#N/A	#N/A	#N/A	#N/A	#N/A	#N/A	#N/A	#N/A	#N/A	#N/A	#N/A	#N/A	#N/A	#N/A
Solyc03g096000.3.1	Clathrin heavy chain	CHC	1702	193	5.39	MAAATAPIIMKETLTLPSAGVNQQFINFTNVTMESEKYICVRETSPQNSVVIIDMNMPMQPLRRPITADSAIMNPNSRILALKAQVPGTTQDHLQIFNIEAKQKIKSYQMPEQVVFWKWITPQILGIVTQTSVYHWPIEGDTEPIKMFDRTANLANNQIINYRCDPSEKWLVLIGIAPGSPERPQLVKGNMQLYSVDQQRSQSLEAHAASFASFRVPGSDRDSILISFATKSLNAGQVISKLHVIELGAQPGKPSFTKKQADLFFPPDFADDFPVSMQISHKYSLIYVITKLGLLFVYDLETATAVYRNRISPDPIFLTAEASSIGGFYAINRRGQVLLATVNETTIIPFVSGQLNNLELAVNLAKRGNLPGAETLVVQRFQELFAQTKYKEAAELAAE…	1.04518	0.242747	1.11419	0.0343552	#N/A	#N/A	#N/A	#N/A	#N/A	#N/A	#N/A	#N/A	#N/A	#N/A	2	4.25192e-05	3.73213	2.71075e-08
	Other membrane protein										#N/A	#N/A	#N/A	#N/A	#N/A	#N/A	#N/A	#N/A	#N/A	#N/A	#N/A	#N/A	#N/A	#N/A
Solyc02g087400.1.1	Ankyrin repeat-containing protein	ANKRD	368	41.5	4.56	MDALFVNSSLSRLKLKFSSQFPTFSPLPHHSYLPLKKLNLPLVFATLQNQHQQQSAAEEVAQEEFEDYDADETYGEVNKIIGSRAIEGGKGMEYLIEWKDEHAPTWVPSNFIAQDVVAEYETPWWNAAKKSDESALRELIEAEDDRDVDAVDDDGRTALLFVSGLGSEPCVKLLAEAGADVNYRDRSGGLTALHMAAGYVKPGVAKLLIELGADPEVQDYRGQTPLSLARMVLNQTPKGNPMQFARRLGLENVIRVLEDAIFEYAQVEEILEKRGKGENVEYLVKWKDGEDNEWVKAWLISEDLVRDFEAGLEYAEAECILEKREGDNGKGEYLVKWTDIEEATWEPEENVDPLLIEDFEKGQQKVVS	0.880745	0.309133	0.768699	0.00819078	#N/A	#N/A	#N/A	#N/A	#N/A	#N/A	0.435275	4.30708e-07	0.25	5.1703e-16	0.0358968	5.16267e-71	0.0358968	7.24004e-27
Solyc10g081240.3.1	GrpE protein homolog	GrpEL	380	42.1	4.82	MFENLLKEPKTLPAYLLYLLPPFPLYHTMATTNLTTPATTLRSPSTTVSATAYSSVKPNCITFLSYSRCGRRQTPLLPRRCRIHHSANSIVPLQHRSVEKFVIFASNEDVAEAAETETETEQVEESEQEGSLDGAASEEASDEDDNAAAEETLSVVAASLQLYRDALATNDDSKVAEIEISLKSIEDEKIELQTKVASLTKELSSERDRVLRISADFDNFRKRTDRERASLVTNAQGEVVEKLLSVMDNFERAKTQIKVATEGEEKINNSYQSISKQFMEILGSLGVEPVETVGKPFDPLLHEAIMREDSSEFKEGVVIEEYRKGFRLGDRLLRPSMVKVSAGPGPAKPETTEPKEKEQIETDEKTAETPGDEGTGEGGN	1.0134	0.834359	0.837856	0.00515459	#N/A	#N/A	#N/A	#N/A	#N/A	#N/A	#N/A	#N/A	#N/A	#N/A	#N/A	#N/A	#N/A	#N/A
Solyc06g035870.3.1	Membrane steroid-binding protein	MSBP	240	25.8	4.55	MALQQWDAWKESIIESTGLSPATIFTIVALAVAFYYAISGFSPSSDHAHHQRSRDFEEQTQVLPPVQLGEVTEDELKEYDGSDPKKPLLMAIKGQIYDVSQSRMFYGPGGPYALFAGKDASRALAKLSFEEKDLTGDISGLGAFELDALQDWEYKFMSKYVKVGTVKQAVPVNDGQANDETIEATTDGEAKPGEDDASGSAKPSEYDGPSKGSEAGADAPSETAAVESVVKSEADVDKKD	0.865337	0.0400503	0.937344	0.086804	#N/A	#N/A	#N/A	#N/A	#N/A	#N/A	#N/A	#N/A	#N/A	#N/A	#N/A	#N/A	#N/A	#N/A
	Cell structure										#N/A	#N/A	#N/A	#N/A	#N/A	#N/A	#N/A	#N/A	#N/A	#N/A	#N/A	#N/A	#N/A	#N/A
Solyc02g089065.1.1	Protein SPIRA.1	SPIRA1	110	11.2	9.31	MGRGVSAGGGQSSLGYLFGSGEPANNSQTARNQEKAPTNEPVSRPAAAAQPVDNTKNVPAGIHSNNTNNYFRADGQNCGNFLTERRSTKVQAAPGGGSSLGYLFGDGSSK	0.893488	0.00755	0.849665	0.00144852	#N/A	#N/A	#N/A	#N/A	#N/A	#N/A	#N/A	#N/A	#N/A	#N/A	#N/A	#N/A	0.5	0.00833999
Solyc11g072490.2.1	Interactor of constitutive active ROPs-like protein	ICR	641	71.6	5.47	MQTPKARNSSSEVPQKKSPRGNSSEVPLKISPRAVRSREAPQKISPRGVPQDVPHKISPRVVRRLKTGASDSDSASSPHVNGRTPKERRAKVAEQKSPKSLESEKKGASKVTELESQITQLKNDLKDKLNSSEACKKQTEVEAKESKEQCAVLSSEPDQSPKQLVNQPSSECTCPTDHQKSSEDLTLRSELETIQKQHSADSASLASALNEIKELKTQLETVAISEATKIKDAEAAQAELQSLKQNLSDTLLLLEDMKKQLKDSKDSEAQAQALVTETLLQLESAKKIVESLRSDGNKVVEAYNALSSELDQSKARASSLEDLVCKLQSGTGNVGESEIVEIDESKETLEAELSSLKSEVQRLRADLKAADIKFNEEKNRSTLEMRSAYELVEQIKSMS…	0.931013	0.0983593	0.862339	0.0180904	#N/A	#N/A	#N/A	#N/A	#N/A	#N/A	#N/A	#N/A	0.406126	7.42167e-20	#N/A	#N/A	#N/A	#N/A
Solyc06g066030.4.1	Protein WVD2-like.1	WDL1	476	51.4	9.35	MMDVVNNIAVSGNGLGFGNGVHQLPEVVAGISNGMPHASPSNEELERSFQSTVILTDSETVGSSVQEVSNETTITVESNAGVSSEEHEAKESDDATNSKEQKTPPRARNAKNSGPQNGVAKKSKDGKEASNGTLASKPRPKQSSSLDAKGKSFSDKKTVEYYSKPALAHLNVDRAKQPGHAEVAASASPSAAQSEGLKEKTKLMPLKKVPPAKADGSAESSSSPTAASDAKPRKVGTLPTYNISFKCDARAEKRKEFYSKLEEKTQAKEVEKSNMQAKTKETQEAEIKMLRKSLKFKATPMPSFYQEPAPPKMELKKIPPTRAKSPKLGRRKSSPTKERINESVMRPGRLSLDENASQNNPVKGHSPLIVKKPQRKSLPKLPSEKTNLSNETRKLSIRK…	0.924684	0.333546	0.889241	0.0299958	#N/A	#N/A	#N/A	#N/A	#N/A	#N/A	#N/A	#N/A	#N/A	#N/A	#N/A	#N/A	#N/A	#N/A
Solyc05g009930.3.1	Protein CHUP1, chloroplastic	CHUP1	991	110.4	5.38	MIVRVGFLVAASIAAYAVKQINVKPSKPSLENGEPLLEQRGDEGDEKEQLLYSTDGLKEVVDEEEEKEEVKLINGIINPAQGNQIDLDDDLFPEFEDLLSGEIEFPLPSDKYDTGREERERVYQTEMAYNANELERLRNLVKELEEREVKLEGELLEYYGLKEQESDVLELQKQLKIKAVEIDMLNITINTLQAEKQKLQEEVFHGTTARKDLEAARSKIKELQRQMQLEANQTKAQLLLLKQHVTELQEKEEEAFKRDSEVDKKLKLVKELEVEVMELKRKNKELQHEKRELVIKLDAAESKIAKLSNMTENEMVAQVREEVTNLKHTNDDLLKQVEGLQMNRFSEVEELVYLRWVNACLRFELRNYQTPQGKVSARDLSKSLSPKSQHKAKQLMLEY…	1.01951	0.710643	0.890081	0.00141109	#N/A	#N/A	#N/A	#N/A	#N/A	#N/A	0.435275	0.000141453	0.267943	2.13201e-07	0.125	2.13682e-27	0.143587	3.86806e-11
Solyc10g085020.3.1	Tubulin beta chain	TubB	454	51.1	4.83	MREILHIQGGQCGNQIGAKFWEVVCAEHGIDSTGRYDGDADLQLERINVYYNEASCGRFVPRAVLMDLEPGTMDSIRSGPYGQIFRPDNFVFGQSGAGNNWAKGHYTEGAELIDAVLDVVRKEAENCDCLQGFQVCHSLGGGTGSGMGTLLISKIREEYPDRMMLTFSVFPSPKVSDTVVEPYNATLSVHQLVENADECMVLDNEALYDICFRTLKLTTPSFGDLNHLISATMSGVTCCLRFPGQLNSDLRKLAVNLIPFPRLHFFMVGFAPLTSRGSQQYRALTVPELTQQMWDAKNMMCAADPRHGRYLTASAMFRGKMSTKEVDEQMLNVQNKNSSYFVEWIPNNVKSTVCDIPPTGLKMASTFIGNSTSIQEMFRRVSEQFTAMFRRKAFLHWYT…	0.92481	0.519482	0.898311	0.00766704	1.76	0.156156	2.85	1.35853e-06	#N/A	#N/A	#N/A	#N/A	#N/A	#N/A	#N/A	#N/A	#N/A	#N/A
Solyc07g064970.4.1	65-kDa microtubule-associated protein 1-like	MAP65-1	581	65.3	5.2	MAAVDDQTPPVLDETTCGTLLQKLQQIWDEVGETDDERDKMLLQIDQECLDVYKRKVDHAVKSRAHLLQALADAKVELSRLLSALGEKTYVGIPEKTSGTIKEQLAAIAPTLEKLWKQKDDRIKDFFDVQSQIQKISSEIAGYSEQVESLTVDESDLSVKKLDEFHVQLQELQKEKSDRLHKVLDLVSTVHDLCAVLGMDFFSTVTEVHPSLDDSTGVQSKSISNDTLSNLANTVLVLKEDKKQRLLKLQELATQLIDLWNLMDTPEEERSLFDHVTCNISASVDEVAIPGALALDLIEQAEVEVERLDQLKASKMKEISFKRQAELEDIYARAHVEIDTEAAREKIMGLIDSGNVDPAELLADMDNQIVIAKEEAHSRKEILEKVEKWMAACEEESWL…	0.954397	0.477933	0.908143	0.0189835	#N/A	#N/A	#N/A	#N/A	#N/A	#N/A	#N/A	#N/A	#N/A	#N/A	#N/A	#N/A	#N/A	#N/A
Solyc07g043320.3.1	Myosin heavy chain%2C embryonic smooth protein	MHC	1511	170.1	4.77	MEAETATTDVPVVQVSEKIEGGKEDLIKVSNGEIGQTEHEESAFDGEFIKVEKEALESKDGSDAAAEASHAEGKVSVMDRSSNISASSREYLEAEEKAKELELELERVAGSLKDTESQNVKLKDELSLTKEKLEETARKFEDLELDHKKLQEQIAEAENRYSTELNALQEALQAQELNNKEHVNVKEAFDRLGLEFESSKKKMEELEQELLASAGEAQKFEELHKQSGSLAESETKKALDFERLLELSKQNAKEVEDQMASLQEELKSLNVKIAENQKVEEALVNTASELSKVQGELETSKSQVQDIESKLASKEALIDELSQELNTRKASESQVKENISSLELLISSTKEDLQAKVSELEGIKLKLQEEVGLKEQIEGKLKSQETQLSESQEELAKLS…	1.15425	0.00693808	1.27788	0.000195082	1.5	0.79011	2.27	0.015529	#N/A	#N/A	2.2974	5.14951e-14	3.03143	1.75625e-25	3.24901	1.08567e-05	2.63902	0.00270852
Solyc05g013850.2.1	Sieve element occlusion b	SEOB	795	90.7	6.96	MTSINPLNEKVSMNNPMTTNPMNNMSSGSAANMMHPISNPTTGHHINPLNAQINPHSVVKPVSHHDMIPASVVPAAHHTAPINPRTSNLAARLPHRRGDHHMFLTSDDNAMMKHIEETHIPDGRDFDVKPLVHIIEDIVHRATPIAGHVHEAKVQAHLEALEEKAPHSGLTDILNYLAYPIHRISMELISKCANKEDAHSTTMSLLHSLTTYAWDTKVVITFAAFAQQYGQFGLLAHQYTTNPLAKSVAIIMELPEIMSRQDVLKHKFDAIHDLIDKMLDVTKCIIEFRDVQTSHSQHVITQELEMLINTAHISTAAYWTMRAAVMCAAMILNLIAIGHEQISSTSESWELSSLTHKLANILDHLKKVLNLCHQKIEEKRQHDAFEALLRLLRTPHIDN…	1.27088	0.00595249	1.41925	0.00427418	#N/A	#N/A	#N/A	#N/A	#N/A	#N/A	#N/A	#N/A	#N/A	#N/A	0.466516	0.00233746	0.5	0.000168583
	Photosynthesis										#N/A	#N/A	#N/A	#N/A	#N/A	#N/A	#N/A	#N/A	#N/A	#N/A	#N/A	#N/A	#N/A	#N/A
Solyc05g014050.3.1	ALBINO3-like protein 1, chloroplastic	ALB4	531	58.5	7.06	MATFFPSLGPNSILSPFVDRTRTLNPVFQRTHFGNLPLNKPFSRGMLGVARFGLGQDPFPDPETAELFFKDLLTRTEGFLYTVADAAVSGSVDTVVDTTGSVKQNSDWLSGITNGMETVLKVLKDGLSTLHVPYSYGFAIILLTILVKAATFPLTKKQVESSLAIRSMAPQIKAIQERYAGDQERIQLETARLYKLAGVNPLAGCLPTLATIPIWIGLYRALSNVANEGLLTEGFFWIPSLAGPTTVAARQTGSGTSWLFPFVDGHPPLGWSDTFAYLVLPVLLVVSQYISIQIMQPSQQSDDPNVKNSQAITKFLPLMLGYFSLSVPSGLSLYWLTNNILSTGQQVWLQKLGGAKVPTLKLSDDTPKKEQPQIQKLVSEATIAKKKDANPTSDKPRQG…	0.921053	0.0294924	0.840501	0.00971633	#N/A	#N/A	#N/A	#N/A	#N/A	#N/A	#N/A	#N/A	#N/A	#N/A	#N/A	#N/A	#N/A	#N/A
Solyc12g056830.1.1	ATP synthase subunit delta, chloroplastic-like	ATPD	250	27.3	8.92	MAALQQTPITFQSRSPPPTQLINGTVAKLSYSGGLKLPKLTLKLRSKRTSRRGRGRGVLGAKMADSAAGSYANALADVAKSNETLEQTTADLEKIEKIFDDDAVYDFFVSPIVSEEKKRELVDEIVSSTGIQPHVANFLNILVDMKRVELIKDIVKEFEKVYNTLTDTELAVVTSVVKLESQHLAQIAKGVQRLTGAKNVRIKTVIDESLVAGFTIRYGNSGSKLIDMSVKKQLEDIAAQLEIGDIQLAV	1.05947	0.423719	1.10166	0.0319286	#N/A	#N/A	#N/A	#N/A	#N/A	#N/A	0.435275	0.000735598	0.25	3.1458e-10	0.0544094	3.04201e-63	0.0669858	1.05999e-15
Solyc12g036170.2.1	Photosynthetic NDH subcomplex B 4	PNSB4	173	20.2	5.78	MSFTFIKPSIPSPTSELLHPFSKSRLRHCPTSPFGNNAGRRHQIERNRVKALPDWPLMAVLVEHMEGQRDLITHKSVWHLSDEAMKNVYTFYIMFTVWGCCFFGSTKDPYYDSEQYRGDGGDGTGHWVYEKQEDIEEEARAELWRDELIEEIEQKVGSLRELEEAGKKEQLVK	0.982313	0.776815	1.13371	0.00942587	#N/A	#N/A	#N/A	#N/A	#N/A	#N/A	0.353553	4.00005e-05	0.189465	2.53978e-10	0.0118415	3.94918e-103	0.0507658	1.37206e-05
Solyc06g065990.1.1	ATP synthase subunit b', chloroplastic	ATPB	223	24.4	5.85	MANMIMSSSKALITSSSSTIPSSPRFKLSLTQIPFPKLPLPRSPKSLETLSIPSTLKSISVILASSLAIAPPSLAEEIEKASLFDFNLTLPTMMAEFLFLMFALDKIYFSPLGKFMDERDSAIKEKLSSVKDTSTEVKQLEDQAAAIMKAARAEISAALNKMKKETQQEVEQKIAEGRKKVEAELLEALASLENQKEETMKSLDSQIAALSDEIVKKVLPASN	1.06898	0.172385	1.19463	0.00526877	#N/A	#N/A	#N/A	#N/A	#N/A	#N/A	0.353553	6.53824e-06	0.189465	2.92337e-11	0.0236831	1.8929e-65	0.0358968	1.35367e-18
Solyc04g009420.3.1	PsbP domain-containing protein	PPD	244	26.5	7.28	MSAISSLVCSNIFRNGFFQCLPSISSIITPLQLKTRSRSLVVLSNEDELVPTYSTRRRALNVSILTVLLSIPFSSFAIAIGEVLELERYTDSAEGFTLLKPSSWSKVDKAGATALFQDANKGSNNVGVVVIPVKITTLSQFGTPQFVADKLILAEKRKESTKEAEVVSVSERTGEGGLQVYEFEYKVDSTRGGLKRILSAAFVASGKLYLLNIAHSDGSEGPIDPDRRNTLEQILHSFDIAPST	0.926599	0.308672	1.2609	0.0116024	#N/A	#N/A	#N/A	#N/A	#N/A	#N/A	0.378929	4.51804e-05	0.189465	3.84482e-08	0.015625	3.95943e-59	0.0334929	1.43502e-20
Solyc05g005490.4.1	Carbonic anhydrase	CA	155	17.2	6.34	MTLFSTSREVTKMAEDSYEDAIAGLKKLLSEKNELEDTAAAKIRQLTAELEGADGKKSDPDEKIRSGFAHFKAEKYEKNPELFGQLAKGQSPKFLVFACSDSRVCPSHILNFQPGEAFVVRNIANMVPPYDQTKYSGVGAAVEYAVVHLKVEKFW	0.988747	0.894497	0.826642	0.0310646	1.44	0.434804	2.26	0.000738038	#N/A	#N/A	#N/A	#N/A	#N/A	#N/A	#N/A	#N/A	#N/A	#N/A
	Chloroplast development										#N/A	#N/A	#N/A	#N/A	#N/A	#N/A	#N/A	#N/A	#N/A	#N/A	#N/A	#N/A	#N/A	#N/A
Solyc10g083490.3.1	Cell division protein FtsZ	FtsZ	480	50.6	5.87	MASCTSAVFVPLDTRLRNGVLTVLARRVCPLKMQDEKVGYLSVNQKGISSCPQFKCSANSHRFNNYQSKDSFLNLHPEISMLQGEGNHTFTTSRQESSSGGVAESLMDSSSLKNFNEAKIKVVGVGGGGSNAVNRMIESSMNGVEFWIVNTDIQAIRMSPVFPENRLPIGQELTRGLGAGGNPDIGMNAAKESKEAIEEAVRGADMVFVTAGMGGGTGTGGAPIIAGIAKSMGILTVGIVTTPFSFEGRRRAVQAQEGIAALRENVDTLIVIPNDKLLTAVSLSTPVTEAFNLADDILRQGVRGISDIITIPGLVNVDFADVRAIMANAGSSLMGIGTATGKTRARDAALNAVQSPLLDIGIERATGIVWNITGGNDLTLFEVNAAAEVIYDLVDPSAN…	0.980592	0.543175	0.851734	0.022604	#N/A	#N/A	#N/A	#N/A	#N/A	#N/A	#N/A	#N/A	#N/A	#N/A	#N/A	#N/A	#N/A	#N/A
Solyc10g084050.2.1	Cell division cycle protein 48-like protein	CDC48	808	89.7	5.27	MTNKAESSDSKGTKRDFSTAILERKKSPNRLVVDEATNDDNSVVAIHPDTMEKLQLFRGDTILIKGKKRKDTICIALADDTCDVPKIRMNKVVRNNLRVRLGDVVSVHQCPDVKYGKRVHILPIDDTIEGVTGNLFDAYLKPYFLEAYRPVRKGDLFLVRGGMRSVEFKVIETDPAEYCVVAPDTEIFCEGEPVIREDENRLDEVGYDDVGGVRKQMAQIRELVELPLRHPQLFKSIGVKPPKGILLYGPPGSGKTLIARAVANETGAFFFCINGPEIMSKLAGESESNLRKAFEEAEKNAPSIIFIDEIDSIAPKREKTNGEVERRIVSQLLTLMDGLKSRAHVIVMGATNRPNSIDPALRRFGRFDREIDIGVPDEVGRLEVLRIHTKNMKLAEEVD…	1.05544	0.277555	1.15586	0.0272662	1.29	0.877495	2.18	0.000792633	#N/A	#N/A	#N/A	#N/A	2.46229	2.86291e-06	4.59479	1.70849e-12	6.9644	4.85468e-19
Solyc02g081200.1.1	Octicosapeptide/Phox/Bem1p (PB1) domain-containing protein / tetratricopeptide repeat (TPR)-containing protein	PB1/TPR	778	85.5	5.76	MGKSGGRKKKAGISQNQNQNQGAVGNSHSPVVNGSVDLDSSIFSKRAHELKEEGNKRFQAKDYVGALEQYENALKLTPKTHPDRAVFHSNRAACLMQMKPIDYDSVVSECTMALQVQPSYVRALLRRARAFEAVGKYEMAMQDVQILLGADPNHRDALEIAGRLRMALGPRPEAQQDLQSRPSPAALGASAVGAAPIAGLGPCLPARPMSKKPAPLGGASAISVNNKPEKPYQVTPAENGPHAKVQLPKVVLKPANGPSRPHADRNKDGQREKASLSASSAVHGHSKDVAIRWRPLKLVYDHDIRLAQMPVTCSFRVLRDIVSKRFPMSKSVLVKYKDSDGDLVTITCTAELRSAESWVDGLLPKDPDADKTGAIGLLRLHVVEVSPEQEPALLEEEEE…	0.85732	0.340809	0.852357	0.0438817	#N/A	#N/A	#N/A	#N/A	#N/A	#N/A	#N/A	#N/A	#N/A	#N/A	#N/A	#N/A	#N/A	#N/A
Solyc04g080900.3.1	GTPase OBG	OBG	681	75.7	7.08	MDIDPRQYEDIAVNDNDVHSIVMSYLAHSCFTDTLESFTTSMGMNQTANLEDMEKRKRIYHLALEGSVLKAIEITDQFAPDLLEKNKDLHFDLLSLHFVGLVCSRKCTEALEFAQAKLAPFGKVQKYVEKLEDFMALLAYNEPEKSPMFHLLSLEYRQQVADSLNRAILANSNLPSYSAVERLMQQTTVVRQCLSQESRRVSSICFERLFEELEPSASQKRNSNEIYRGYTVKCALAKTRMPPSPASDAYIREPHKYFDEVVITVRAGDGGHGAVLSMPNQKAPSKSQGKFDRDKTKKKASYKRDFDGSIILPMGGHGGDVVLYADESKDSLLEFHNKSKHKAKRGGNVDSMGVLTSHMQNGATSPTLRIPVPLGTVVKLKKGKFLADLANPGDEVLVA…	0.886839	0.0214304	0.937577	0.194591	#N/A	#N/A	#N/A	#N/A	#N/A	#N/A	0.466516	0.000199824	0.378929	3.06631e-06	#N/A	#N/A	#N/A	#N/A
Solyc11g012670.1.1	Pentatricopeptide repeat-containing protein	PPR	689	76.9	5.63	MASAPSSTLSPLYESNIFCNFNSPQKFTFPLKLHSKSCIRTTQVSLQEQSQVSNPNTSQYPDRKAVSSSKSKLWVNPKSPRASELKRKSYDFRYASLMKVAESLDSCKPVEEDVSNVLAELGDKIVEQDAVVTLNNMTNAETALLAMKYFQQRLKLSKEVIVYNVTLKVLRKNKDLDRAEKVFDEMLERGVKPDNVTFSTIISCARQCNLPEKAIEWFEKLPSFGCEPDDVTYSVMIDAYGKAGNVDMALSLYDRARTEKWRIDAVTFATLIRIYGAAGNFDGCLNVYEEMKALGVKPNMTVYNSLLDAMGRARRPWQAKNIYGEMLTNGFQPSWGTYASLIRAYGRARYGEDALKIYKEMKEKGLELSVVLYNTLLAMCADVGLTDEAVNIFEEMKSS…	1.04665	0.502506	0.906709	0.0179257	#N/A	#N/A	#N/A	#N/A	#N/A	#N/A	#N/A	#N/A	#N/A	#N/A	0.203063	1.43357e-24	0.217638	3.89988e-09
Solyc12g044400.3.1	ATP-dependent zinc metalloprotease FtsH	FtsH	860	97.6	9.41	MACNSILNSPFLPSFPPKNKPHYRKNTIPVIISCNSHKPRTEEEKKIRISQLGLLNLSVTLTVISASLVRPANAAKVSEKRKKSEALTPQELKKWSQGLPTVSNRLPYTEILDLKREGKLKHIIKPPNVGLKQRPEVVLAVLEDSKVVRIVLPSVESDPRFWAEWDELKVDGLCMNAYTPPLKKPELPSPYLGFLSNIPAWLLSFMKAKPQSKKALELKRMREELKRRQKQELAKIQNERERMAKAMKMQKKMEESKRKRELKRMSYRRQKKDYDDRLKIEKADAEEKKKLRELEREMEGIEGVDDDEEEGRKGEDNPYMKMAMQFMKSGARVRRARNTKLPQYLERGIDVKFSDVAGLGKIREELEEIVKFFTHGEMYRRRGVKIPGGILLCGPPGVG…	0.909939	0.0218384	0.986812	0.530732	#N/A	#N/A	#N/A	#N/A	#N/A	#N/A	#N/A	#N/A	#N/A	#N/A	#N/A	#N/A	#N/A	#N/A
	Embryo development										#N/A	#N/A	#N/A	#N/A	#N/A	#N/A	#N/A	#N/A	#N/A	#N/A	#N/A	#N/A	#N/A	#N/A
Solyc06g006000.3.1	Maternal effect embryo arrest 59	MEE59	169	19.5	5	MEVNGNIRPNRSDVHLSKEEETKIEEETREYFDGIAPKRHTKPQRSDYSSTYVDHINLYPSSHDTIPENLEFQRLENDPQKLVYNGSQVTEEFIETEYYKDLNCIDKQHHTTGTGFIKVENNENTFNIGADYTTDPSHVYKGNPATNDWIPSAVDEVNFISGKPHRSDN	0.941027	0.00218027	0.89981	0.000330605	#N/A	#N/A	#N/A	#N/A	#N/A	#N/A	#N/A	#N/A	#N/A	#N/A	4	5.74898e-05	3.73213	4.56791e-06
Solyc03g117360.4.1	TOPLESS1	TPL	1151	126.8	7.02	MESAQTLFLHNSSGLGDEVVAMSSLSRELVFLILQFLDEEKFKETVHKLEQESGFFFNMKYFEDEVHNGNWDEVEKYLSGFTKVDDNRYSMKIFFEIRKQKYLEALDKRDRSKGVEILVKDLKVFASFNEELFKEITQLLTLENFRENEQLSKYGDTKSARAIMLVELKKLIEANPLFRDKLQFPNLKNSRLRTLINQSLNWQHQLCKNPRPNPDIKTLFVDHSCGQPNGARAPSPANNPLLGSVPKPGSFPPLGAHGPFQPGPAPVAAPLAGWMSNPPTVAHPAVSGGPMGLGPSSIPASLKHPRTPPTNPSIDYPSGESDHAAKRTRSLGISDEVNLPVNVLPISFPGQGHNQSLTVPDDLPKTVARTLNQGSSPMSMDFHPSQQTLLLVGTNVGDI…	1.03826	0.644623	0.901606	0.00732041	#N/A	#N/A	#N/A	#N/A	#N/A	#N/A	#N/A	#N/A	#N/A	#N/A	#N/A	#N/A	#N/A	#N/A
	Miscellaneous & function unknown										#N/A	#N/A	#N/A	#N/A	#N/A	#N/A	#N/A	#N/A	#N/A	#N/A	#N/A	#N/A	#N/A	#N/A
Solyc08g067030.3.1	DUF642 domain-containing protein	DUF642	371	40.7	6.65	MKSSIKVLLLLVLLCAISSISIAVIDGLLKNGNFEMPPSKADLNGTEVLKHNAIPEWSISGFVEYIKAGQKQGDMLLVVPEGYAAVRLGNEASIKQILNVTKGMYYSLTFSAARTCAQEERINVSVTPDFGVLPIQTLYSSSGWDSYAWAFQAEFPQVEILLHNPGVEEDPACGPLIDSIAIRTLYPPRATNQNLLKNGDFEEGPYVFPNTSWGVLVPPNIEDDHSPLPAWMVESLKAVKYLDSDHFSVPHGKRAIELVAGKESAIAQVARTTIGKMYQLSFKVGDASNACEGSMIVEAFAGRDTLKVPYESMGKGGYKRAILRFKATASRTRIMFLSTYYHTRSDDFVSLCGPVVDDVTLLSVRTHRRVL	0.929477	0.0619197	0.832972	0.030214	#N/A	#N/A	#N/A	#N/A	#N/A	#N/A	0.378929	0.000121953	0.217638	4.01846e-07	0.0236831	6.54289e-63	0.0544094	4.55642e-32
Solyc11g068510.2.1	Copper ion binding protein	CBP	124	13.5	9.28	MLGIFEKKFEMAARNAFRYVSRRLSSSGKVLSEEEKAAENVYIKKMEKEKLEKLARQGPKPGEQAAGGSGSVPDAASSAQASSTSRVSDDKYRNYGVLAGLITGVGALGWYLMSKDKKTEEVQD	0.883714	0.246851	0.833333	0.0177224	#N/A	#N/A	#N/A	#N/A	#N/A	#N/A	#N/A	#N/A	#N/A	#N/A	#N/A	#N/A	#N/A	#N/A
Solyc01g068590.4.1	Metal ion-binding protein	MBP	1255	142.1	6.55	MRSMSIPKEPEQVMKQRDGSVLGKKTILKSDHFPGCQNKRLSPHIDGAPNYRKAASLHVHGVAIPTVEGIQNVLDHIGTQLSGKKTHILWINLREEPVLYINGRPFVLREVERPFSNLEYTGINRTRVEEMEDRLKDDVLQEAARYGNKILVTDELPDGQMVDQWEPVTYDSVKTPLQVYEELQTKEYLVEYERVPITDEKSPKELDFDILVHRVSQADVNTQIIFNCQMGRGRTTTGMVIATLVYLNRIGASGIPRSNSIGRVSDCISNLNDTLANSEEAIRRGEYTVIRSLIRVLEGGVEGKRQVDKVIDKCSSMQNLREAIAIYRNSILRQPDEMKREAALSFFVEYLERYYFLICFAVYLHTQRDALFAGSSAHCSFSDWMKARPELYSIIRRLL…	0.960816	0.429736	0.870142	0.00821752	#N/A	#N/A	#N/A	#N/A	#N/A	#N/A	#N/A	#N/A	#N/A	#N/A	#N/A	#N/A	#N/A	#N/A
Solyc08g082410.4.1	LOW protein: zinc finger CCCH domain protein	ZC3H	1333	149.5	5.82	MPRSSKHKSHKQSKYSPKECRDYSYSDSDSEVKTKEKEKERSSKEDSLARVSKDSIHSGSGEKRKHSSQSKEGKDGKDLSGYGNGDASEEYVSSKRRKEKVEVGSGGADRWNGAADNALKGESLKIDADKGSKGKETKSSSDSKSKSSKKEGNVASLVEKEESKSGRVESKRKSEKDSGRKEGKDSKEVKEKERGSDREKKGHESKRDDADNVKKQGSQSGDVTEEKQNKKGRETAEWSIQNEAPNVDLDKDAEKRARKRREIPGDRDKYDDDINEGDERRLSSRSERTKGEKQRHEKHKEYKEDVDKDDRHKDDRYREDVDKDRKRRDDKYREDSDRDNRRRDDKYLEDVDRDSRRRDDKYRDDGDRDNRRKDGRYREDDERDSRRRDDKYREDGDND…	0.948187	0.605723	0.885039	0.00117795	#N/A	#N/A	#N/A	#N/A	#N/A	#N/A	#N/A	#N/A	#N/A	#N/A	#N/A	#N/A	#N/A	#N/A
Solyc10g076350.2.1	Macrophage migration inhibitory factor	MIF	136	14.5	7.75	MPCLNISTNVNLEGVDTSSVLSEATSTVAKLIGKPEAYVMIVLKGSVPMAFGGTEQPAAYGELVSIGGLNADVNKKLSAAIADILETKLSIPKSRFFLKFYDTKVCPSKSRICTMSSCYTPVLDHGSFFGWNGSTF	0.992776	0.853338	0.890704	0.0161478	#N/A	#N/A	#N/A	#N/A	#N/A	#N/A	#N/A	#N/A	#N/A	#N/A	0.353553	6.15429e-12	0.287175	3.14999e-11
Solyc07g061790.3.1	Heme-binding protein 2-like	HBP2	229	25.8	7.72	MLSVSMNLLMMRLCLFLFLVSKLCNGYSTKLNFYPPTCQRIECPNYDLIESGKDYEIRRYDSPMWMSTAPIDDISYVSATRTGFLRLFDYIQGKNKYHETVKMTAPVIIQVKPSDGPFCASSFVVSFYVPKKNQPNPPPAKGLHLQKWGDTYVAVRQFSGFIADDDLPREAAALSASIAGTNWAAAIDKSHAADNTTLYTVAGYNSPFEFKNRVNEIWFTFDLEKALAI	0.899849	0.271271	0.900151	0.0148212	#N/A	#N/A	#N/A	#N/A	#N/A	#N/A	0.307786	3.79494e-06	0.164938	1.45419e-10	0.0769465	1.91014e-50	0.0769465	4.40118e-18
Solyc11g011220.2.1	Transmembrane protein (Protein of unknown function DUF2359)	TP	601	66.8	8.32	MEEYEAFLIEPEQEWQTVSYHKKNKKQSGKSKQGEEFSGNWNNGESSGDVFRSIEQHAEERRKRIVESQKLYEAASGESSAVIDKNEQDSDGEDAAGGAIENDGVVEKKSKPKKVKKPKVTVAEAAAKIDNSDLVVYLVDISTSFDKQEDIQLMRFADYFGRAFAKVSSSQFPWMKILRESSVEKMIDIPVSQISEDVYKTSVDWLNQRSFDALGSFVLWSLDSIIADLVQHEGASKGSKKVVQQVSSKSQVAMFVVLAMVLRRKPDVLISLLPILNENGKYRGQDKLPVMIWAVTQACQADLIVGLFMWVHFLLPLLSSKLNSNPQSRDLMLQLAERIVSSPKARAILINGAVRKGERVVPPSALEVLMRITFPAPSARIKATDRFEAVYPTLKEVAL…	1.00872	0.819721	1.10642	0.0203203	3.02	0.378107	7.73	3.40071e-22	#N/A	#N/A	3.03143	1.39285e-12	4.28709	3.26149e-18	3.24901	5.80666e-10	3.03143	4.93173e-10
Solyc01g107330.5.1	SWIB domain-containing protein	SWIB	187	20.7	10.26	MVNKTESPKGAVTLIFTDTKNPFGHTYLCKFKNIKTYRKKIMAVSLGLFSVFSTGVTASFAKSDSFSSVRLASPLAAHHVNNLRTVRTVTFATASKPVAEPKKREPRGIMKPRRVSPEMQAFLGGMSEVPRTQALKLIWAHIKANDLQDPQNKKVIICDEKLKTIFGGKERVGFLEIAGLISPHFLK	1.08638	0.0648368	1.13553	0.0102704	#N/A	#N/A	#N/A	#N/A	#N/A	#N/A	#N/A	#N/A	#N/A	#N/A	#N/A	#N/A	#N/A	#N/A
Solyc05g051750.3.1	TOMPRORNA prosystemin	TomP#	201	23	4.68	MGTPSYDIKNKGDDMQEEPKVKLHHEKGGDEKEKIIEKETPSQDINNKDTISSYVLTGDDTQEIPKMEHEEGGYVKEKIVEKETISQYIIKIEGDDDAQEKLKVEYEEEEYEKEKIVEKETPSQDINNKGDDAQEKPKVEHEEGDDKETPSQDIIKMEGEGALEITKVVCEKIIVREDLAVQSKPPSKRDPPKMQTDNNKL	1.13206	0.0195723	1.04606	0.152882	#N/A	#N/A	#N/A	#N/A	#N/A	#N/A	#N/A	#N/A	#N/A	#N/A	#N/A	#N/A	2.2974	0.00419693
Solyc11g012320.3.1	Induced stolen tip protein TUB8-like isoform.1	TUB8	154	15.3	3.47	MASVEVESAPVAPVETTPAEVEVTPAPEVNKAEEPAPAVEKDVEVESAPAPEEAAPAAEEVAAPVAEEPAAAEPVAAESEEPVAVAAEPVAAPVEEPVAAEEPAAAAEEPVAAAPVEEAPAPVAEPEAAPVAEPEAEKTEESAPASEEPEKVEE	1.03336	0.932839	1.63568	0.00996094	#N/A	#N/A	#N/A	#N/A	#N/A	#N/A	#N/A	#N/A	#N/A	#N/A	#N/A	#N/A	#N/A	#N/A
Solyc01g100760.2.1	DUF538 domain-containing protein	DUF538	164	18.5	6.58	MSLITEEMRASATEFYTGNDICQEKSKFLLTEMNLPNGLLPLQDMLECGYVKDTGFVWLKSKKKTEHKFEKIGRSVQYATEVTAYVEPNKIKKLTGVKAKELLMWLTLNEISVDEPSTGKIHFKTPTGLARTFPVSAFELDLPKKEVKEEAKEVNAAAVEVKEV	1.01199	0.77426	0.87918	0.00838617	#N/A	#N/A	#N/A	#N/A	#N/A	#N/A	#N/A	#N/A	0.406126	5.95992e-07	#N/A	#N/A	0.435275	0.0261015
Solyc11g007680.2.1	Hypothetical protein, no putative conserved domains have been detected	/	138	15.2	5.31	MADTTTTTTISGDSITVTDDQKNNPTNPLASFISSVLQLFKPPPASSKKIEPTAATSDLKPIASAEKEEKAAVVKFPRQDLPSLKLETEGAEPNTNPIVLWQVYAIGGFFVLRWAWSRWNERRGNRKPSDEEPPPSQE	0.972154	0.652891	1.13289	0.0102156	#N/A	#N/A	#N/A	#N/A	#N/A	#N/A	#N/A	#N/A	#N/A	#N/A	0.435275	7.99778e-07	0.378929	6.90644e-05
a Accession number from ITAG 4.1 protein database from the Sol Genomics Network. b The name of the proteins. c The abbreviations for the protein names. The abbreviations marked with a pound (#) are defined by us. d The quantitation information in different comparison of samples upon different immune response activation revealed by whole poproteome analysis. The red or green color indicates the in…
