# Supplementary material for: Integrative Proteomic and Phosphoproteomic Analyses of Pattern- and Effector-Triggered Immunity in Tomato
Source: Front Plant Sci. 2021 Dec 3;12:768693. doi: 10.3389/fpls.2021.768693 (PMC8677958; doi:10.3389/fpls.2021.768693)
Supplement: Supplementary file 14 [file Table_11.XLSX]

## Sheet: Table S11
Supplementary Table S11. The newly identified PTI-specific, ETI-specific, as well as ETI and PTI common induced proteins by the proteomic analysis.
Accession No.	Protein name	Abbreviation	Protein abundance from the whole proteome
			PTI/CK		ETI/CK
			Ratio	p value	Ratio	p value
Newly identified PTI-specific induced proteins
Solyc10g085920.3.1	UDP-glucuronic acid decarboxylase.1	UXS1	1.22326	0.0323382	1.03864	0.507285
Solyc07g043420.3.1	2-oxoglutarate-dependent dioxygenase 2	2OGDD2	1.20795	0.0330061	0.954961	0.463443
Solyc12g098490.2.1	Serine hydroxymethyltransferase	SHMT	1.14995	0.000889987	0.994757	0.864032
Solyc01g098000.3.1	Elongation factor 1-delta	eEF1d	1.1416	0.0169757	1.0253	0.267798
Solyc05g054310.4.1		eEF	1.14018	0.0151013	0.988897	0.659612
Solyc02g065170.3.1	L-ascorbate oxidase-like protein	ASO	1.13377	0.011482	0.927472	0.183734
Solyc05g051750.3.1	TOMPRORNA prosystemin	TomP#	1.13206	0.0195723	1.04606	0.152882
Solyc09g031970.3.1	Alpha-1,4 glucan phosphorylase	GP	1.1303	0.0064701	0.989576	0.775969
Solyc10g049620.2.1	Progesterone 5-beta-reductase 4	5β-POR	1.12689	0.0197537	1.05358	0.00835123
Solyc04g005653.2.1	Peroxisomal nicotinamide adenine dinucleotide carrier	NDT	1.12491	0.0143497	1.08628	0.0354541
Solyc02g093140.4.1	Cystathionine beta-synthase (CBS) domain-containing protein CBSX1, chloroplastic	CBSX1	1.11195	0.030281	0.985532	0.60402
Solyc05g006520.5.1	Pyruvate dehydrogenase E1 component subunit alpha	PDHA1	1.11134	0.0476227	1.04454	0.122294
Solyc04g014670.3.1	Short-chain dehydrogenase/reductase SDR	SDR	1.10941	0.000356519	0.989232	0.750944
Solyc11g071620.3.1	Aldehyde oxidase 1	AOX1	1.10623	0.0331081	1.03253	0.370176
Solyc08g068400.4.1	Alpha/beta-Hydrolases superfamily protein	ABH#	1.10248	0.0178795	1.03498	0.249037
Newly identified ETI-specific induced proteins
Solyc11g012320.3.1	Induced stolen tip protein TUB8-like isoform.1	TUB8	1.03336	0.932839	1.63568	0.00996094
Solyc03g094175.1.1	Transcriptional coactivator/pterin dehydratase	PCDH	1.14825	0.342528	1.62018	0.00853732
Solyc09g089720.4.1	2-oxoglutarate (2OG) and Fe(II)-dependent oxygenase superfamily protein	2OGX	1.08726	0.0152213	1.34367	7.31087e-05
Solyc07g019460.3.1	NADPH--cytochrome P450 reductase	CPR	1.13219	0.0860593	1.23617	0.00723995
Solyc01g098610.4.1	Glutathione synthetase 2	GS2	1.0603	0.14766	1.18707	0.00517791
Solyc02g087240.4.1	NADH dehydrogenase [ubiquinone] flavoprotein 1, mitochondrial	NDUFV1	1.04001	0.292341	1.17006	0.0085114
Solyc02g094140.4.1	Mitochondrial import receptor subunit TOM20	TOM20	1.13426	0.108174	1.15856	0.0496793
Solyc04g074380.4.1	Glycosyltransferase	GTase1	1.06441	0.017758	1.15587	0.00367785
Solyc05g012480.4.1	Mitochondrial processing peptidase	MPP	1.07649	0.290125	1.14695	0.0152818
Solyc05g055730.4.1	Methylenetetrahydrofolate reductase	MTHFR	1.02577	0.591972	1.14388	0.0305064
Solyc01g107330.5.1	SWIB domain-containing protein	SWIB	1.08638	0.0648368	1.13553	0.0102704
Solyc06g084520.3.1	Cul1	Cul1	1.06382	0.161427	1.13123	0.0217719
Solyc07g054190.4.1	Riboflavin synthase	RibE	1.07201	0.146349	1.12912	0.0370943
Solyc05g056250.3.1	Aspartate--tRNA ligase, cytoplasmic	AspRS	1.05361	0.0304601	1.11668	0.0118954
Solyc11g069090.2.1	ATP-binding ABC transporter	ABCT	1.09364	0.0813842	1.11651	0.0469983
Solyc09g011730.5.1	Nuclear transport factor 2 (NTF2) family protein	NTF22	0.972184	0.683621	1.11613	0.0141295
Solyc05g005800.5.1	Threonine--tRNA ligase, cytoplasmic	ThrRS	1.09036	0.086703	1.11562	0.00727524
Solyc01g111780.5.1	Transportin-1	TRN1	1.07504	0.0195592	1.10846	0.01707
Solyc04g007120.4.1	Ubiquitin receptor RAD23c	RAD23c	1.04647	0.174019	1.10587	0.0356152
Solyc02g070650.2.1	60S ribosomal protein L18a	RPL18A	1.09881	0.128267	1.10097	0.0064361
Solyc09g059310.3.1	Nuclear transport factor 2 (NTF2) family protein with RNA binding (RRM-RBD-RNP motifs) domain-containing protein	NTF21	1.04653	0.23095	1.10057	0.0411133
Newly identified PTI-ETI common induced proteins
Solyc07g049645.1.1	Benzyl alcohol O-benzoyltransferase	BEBT	1.3188	0.0305909	2.29264	0.00811681
Solyc05g013850.2.1	Sieve element occlusion b	SEOB	1.27088	0.00595249	1.41925	0.00427418
Solyc11g017010.2.1	SlSUT1	SlSUT1	1.15832	0.0282012	1.12389	0.0207859
Solyc04g082460.4.1	Catalase	CAT	1.15568	0.00384413	1.1026	0.0343691
Solyc10g083760.3.1	Chloroplast threonine deaminase.1	TD1	1.14372	0.0318089	1.11805	0.00193467
Solyc06g150137.1.1	Cytochrome P450	CYP4503	1.1359	0.0164977	1.2763	0.00301043
